# Supplementary material
Source: publisher figshare collection journal article supplement (https://geolsoc.figshare.com/ndownloader/files/35238307)
Supplement: Supplementary file 1 [file 35238307]

## Sheet: Sheet2
Table S1. U-Pb isotope data
												Radiogenic Ratios (± 1 sigma error absolute)											Age (Ma)
Spot Name	Session	U (ppm)	Th (ppm)	Th/U	± 1σ	Pb* (ppm)	204Pb (ppb)	204Pb/ 206Pb	± 1σ	f(206)204	± 1σ	208Pb/ 206Pb	± 1σ	208Pb/ 232Th	± 1σ	206Pb/ 238U	± 1σ	207Pb/ 235U	± 1σ	207Pb/ 206Pb	± 1σ	Correlation Coefficient	206Pb/ 238U	± 1σ	207Pb/ 206Pb	± 1σ	Discord %			Kohler
07RAT-35
9349-001.1	IP449-1	100.29	75.15	0.77412	0.01725	39	2	8.521e-05	8.453e-05	0.00148	0.00146	0.22345	0.00644	0.09746	0.0038	0.33764	0.00469	5.41626	0.12005	0.11634	0.00182	0.7144	1875.32	22.63	1900.78	28.37	1.3
9349-002.1	IP449-1	205.61	85.25	0.42832	0.00917	100	5	6.459e-05	2.831e-05	0.00112	0.00049	0.12259	0.00184	0.12716	0.00376	0.44426	0.00616	9.40407	0.15539	0.15352	0.00114	0.8954	2369.69	27.56	2385.55	12.68	0.7
9349-003.1	IP449-1	109.09	97.97	0.92773	0.01965	44	3	9.726e-05	6.025e-05	0.00169	0.00104	0.27671	0.00428	0.10128	0.00302	0.33958	0.00482	5.50223	0.1116	0.11752	0.00151	0.7786	1884.64	23.23	1918.79	23.19	1.8
9349-004.1	IP449-1	158.75	92.5	0.60195	0.01265	113	2	1.971e-05	3.296e-05	0.00034	0.00057	0.16386	0.0022	0.16145	0.0046	0.59307	0.00816	19.2526	0.30086	0.23544	0.00139	0.9275	3001.86	33.1	3089.41	9.42	2.8
9349-005.1	IP449-1	42.76	74.06	1.78949	0.0621	18	2	0.00021806	0.00017824	0.00378	0.00309	0.52108	0.0107	0.08633	0.00378	0.29647	0.00502	4.25353	0.15202	0.10406	0.00306	0.5766	1673.78	25	1697.69	55.24	1.4
9349-006.1	IP449-1	40.73	56.3	1.42784	0.03539	16	5	0.00044579	0.00023312	0.00773	0.00404	0.42807	0.01713	0.0902	0.00447	0.30085	0.0047	4.2571	0.18165	0.10263	0.00388	0.4765	1695.54	23.31	1672.15	71.58	-1.4
9349-007.1	IP449-1	6.43	3.22	0.5174	0.03881	2	4	0.00243328	0.00200273	0.04217	0.03471	0.13674	0.07734	0.08442	0.04967	0.31943	0.04586	3.81175	1.59258	0.08655	0.03244	0.4558	1786.93	228.07	1350.43	974.92	-32.3
9349-008.1	IP449-1	78.83	54.26	0.71112	0.0157	30	3	0.00011468	6.819e-05	0.00199	0.00118	0.2028	0.00805	0.09485	0.0047	0.33258	0.00662	5.42052	0.13851	0.11821	0.00162	0.8458	1850.89	32.09	1929.28	24.82	4.1
9349-011.1	IP449-1	115.63	93.93	0.83918	0.01769	59	1	1.967e-05	3.337e-05	0.00034	0.00058	0.23565	0.00299	0.12067	0.0034	0.42973	0.00594	9.11606	0.15116	0.15386	0.00117	0.8905	2304.49	26.82	2389.22	13	3.5
9349-014.1	IP449-1	70.33	36.19	0.5316	0.01162	40	4	0.00013966	8.16e-05	0.00242	0.00141	0.14677	0.00398	0.13816	0.00518	0.50042	0.00698	12.6514	0.22442	0.18336	0.00172	0.8518	2615.61	30.04	2683.48	15.57	2.5
9349-016.1	IP449-1	96.99	46.44	0.4946	0.01089	63	2	3.981e-05	3.41e-05	0.00069	0.00059	0.13452	0.00445	0.15048	0.00637	0.55328	0.00807	17.003	0.29026	0.22288	0.00161	0.9076	2838.82	33.59	3001.63	11.66	5.4
9349-017.1	IP449-1	113.05	188.6	1.7234	0.03667	54	4	0.00012612	6.055e-05	0.00219	0.00105	0.51126	0.00804	0.10038	0.00306	0.33838	0.00514	5.45907	0.1139	0.11701	0.00147	0.803	1878.86	24.8	1911.01	22.67	1.7
9349-018.1	IP449-1	151.55	73.02	0.49777	0.01052	83	2	3.608e-05	3.639e-05	0.00063	0.00063	0.14254	0.00212	0.13798	0.00401	0.48183	0.00638	11.5804	0.17935	0.17431	0.00114	0.908	2535.22	27.82	2599.5	10.95	2.5
9349-020.1	IP449-1	70.64	51.47	0.75271	0.02039	24	3	0.00014034	7.56e-05	0.00243	0.00131	0.22889	0.00552	0.09116	0.00365	0.2998	0.00505	4.41629	0.11223	0.10684	0.00182	0.7472	1690.31	25.12	1746.17	31.51	3.2
9349-021.1	IP449-1	37.04	22.7	0.63312	0.01448	12	4	0.00038019	0.00015715	0.00659	0.00272	0.1788	0.01334	0.08368	0.00675	0.2963	0.00607	4.27738	0.17947	0.1047	0.00358	0.5897	1672.95	30.24	1709.03	64.21	2.1
9349-022.1	IP449-1	65.43	32.05	0.50595	0.02716	51	3	9.259e-05	8.198e-05	0.0016	0.00142	0.13436	0.00468	0.17142	0.01134	0.64552	0.01091	24.5095	0.59886	0.27538	0.00431	0.7716	3210.67	42.87	3336.9	24.73	3.8
9349-024.1	IP449-1	55.61	39.49	0.73362	0.02476	33	2	8.108e-05	7.851e-05	0.00141	0.00136	0.19933	0.00467	0.13351	0.00591	0.49135	0.00811	12.4821	0.26987	0.18424	0.00222	0.8334	2576.52	35.17	2691.45	20.04	4.3
9349-025.1	IP449-1	211.34	106.29	0.51953	0.03229	53	86	0.00194562	0.00025047	0.03372	0.00434	0.12862	0.02632	0.05814	0.01318	0.23485	0.01763	3.97978	0.5875	0.1229	0.01451	0.6084	1359.86	92.69	1998.82	226.24	32
9349-026.1	IP449-1	157.75	11.89	0.07787	0.00185	104	5	5.79e-05	4.307e-05	0.001	0.00075	0.01881	0.00169	0.147	0.01379	0.60849	0.0078	20.1524	0.84613	0.2402	0.00923	0.4196	3063.95	31.33	3121.29	62.49	1.8
9349-027.1	IP449-1	163.36	71.15	0.44994	0.00944	77	5	8.119e-05	4.396e-05	0.00141	0.00076	0.12524	0.00475	0.12028	0.00642	0.43213	0.01348	8.91121	0.44744	0.14956	0.00533	0.7102	2315.29	60.98	2340.94	62.27	1.1
9349-028.1	IP449-1	94.18	69.3	0.76016	0.01781	76	1	1.605e-05	1.884e-05	0.00028	0.00033	0.20294	0.00235	0.17043	0.00503	0.63837	0.00878	23.054	0.66492	0.26192	0.00621	0.5795	3182.59	34.64	3258.32	37.79	2.3
9349-030.1	IP449-1	95.06	90.88	0.98758	0.02105	38	0	1.04e-05	3.751e-05	0.00018	0.00065	0.29595	0.00456	0.09945	0.003	0.33185	0.00492	5.18938	0.10425	0.11342	0.00134	0.8118	1847.33	23.87	1854.86	21.52	0.4
9349-031.1	IP449-1	175.6	67.72	0.39839	0.00829	90	12	0.00017093	4.347e-05	0.00296	0.00075	0.10863	0.00211	0.12728	0.00405	0.46678	0.00669	10.372	0.17028	0.16116	0.00103	0.922	2469.43	29.48	2467.84	10.86	-0.1
9349-032.1	IP449-1	309.85	20.14	0.06716	0.00153	137	1	1.195e-05	1.177e-05	0.00021	0.0002	0.01953	0.00122	0.1277	0.00868	0.43905	0.00582	9.30278	0.13032	0.15367	0.00049	0.9743	2346.37	26.12	2387.22	5.43	1.7
9349-033.1	IP449-1	112.93	109.39	1.00065	0.02216	61	5	0.00010674	3.776e-05	0.00185	0.00065	0.28113	0.00309	0.12346	0.00352	0.43945	0.00621	9.32372	0.15054	0.15388	0.00096	0.9234	2348.2	27.87	2389.47	10.67	1.7
9349-034.1	IP449-1	92.15	99.8	1.1188	0.02354	50	1	4.089e-05	3.68e-05	0.00071	0.00064	0.31707	0.004	0.12232	0.00343	0.43161	0.00586	8.98855	0.14522	0.15104	0.00109	0.8961	2312.99	26.43	2357.74	12.4	1.9
9349-035.1	IP449-1	147.99	117.25	0.81848	0.01881	75	1	1.016e-05	3.152e-05	0.00018	0.00055	0.23767	0.00309	0.12321	0.00377	0.42432	0.00653	8.72307	0.16327	0.1491	0.00133	0.8821	2280.04	29.64	2335.63	15.29	2.4
9349-036.1	IP449-1	79.97	62.21	0.80364	0.02027	30	3	0.00014006	0.00010769	0.00243	0.00187	0.23048	0.00589	0.09308	0.00375	0.32456	0.00594	5.12165	0.13813	0.11445	0.00202	0.7604	1811.96	28.97	1871.23	32.19	3.2
9349-037.1	IP449-1	72.74	38.9	0.55242	0.01211	36	0	1.428e-05	0.00014027	0.00025	0.00243	0.15199	0.00589	0.12191	0.00578	0.4431	0.00714	9.66495	0.2413	0.1582	0.00272	0.7312	2364.49	31.97	2436.48	29.38	3
9349-038.1	IP449-1	187.99	153.62	0.84419	0.01742	145	2	2.506e-05	1.601e-05	0.00043	0.00028	0.2281	0.0037	0.16488	0.00497	0.61024	0.00904	20.3175	0.33649	0.24147	0.00139	0.9384	3070.96	36.31	3129.71	9.2	1.9
9349-040.1	IP449-1	96.6	53.48	0.57197	0.01305	53	2	5.497e-05	7.507e-05	0.00095	0.0013	0.16475	0.00357	0.13697	0.00474	0.47552	0.00681	11.3331	0.20342	0.17285	0.00158	0.8621	2507.73	29.84	2585.46	15.38	3
9349-041.1	IP449-1	55.01	23.47	0.44069	0.01012	29	4	0.00019625	6.821e-05	0.0034	0.00118	0.12776	0.00439	0.13584	0.0061	0.46854	0.00822	11.2608	0.24659	0.17431	0.00193	0.8647	2477.16	36.2	2599.45	18.6	4.7
9349-042.1	IP449-1	52.48	54.69	1.07648	0.02476	27	2	0.00012117	9.126e-05	0.0021	0.00158	0.31518	0.00937	0.12106	0.00506	0.41348	0.00754	8.52172	0.22609	0.14948	0.00256	0.7679	2230.81	34.47	2339.94	29.61	4.7
9349-043.1	IP449-1	256.4	145.08	0.58454	0.01198	177	5	4.156e-05	2.573e-05	0.00072	0.00045	0.16331	0.00168	0.16172	0.00427	0.57886	0.00759	17.8983	0.27607	0.22425	0.00149	0.9038	2944.08	31.06	3011.49	10.73	2.2
9349-045.1	IP449-1	142.99	249.96	1.80588	0.03834	67	1	2.802e-05	5.051e-05	0.00049	0.00088	0.52204	0.00623	0.09574	0.00275	0.3312	0.00502	5.35506	0.11562	0.11727	0.00159	0.7813	1844.2	24.38	1914.96	24.57	3.7
9349-046.1	IP449-1	155.83	221.58	1.46892	0.03434	107	0	2.85e-06	2.158e-05	5e-05	0.00037	0.41093	0.00375	0.13947	0.00401	0.49855	0.00699	12.5569	0.22416	0.18267	0.00172	0.8516	2607.57	30.14	2677.28	15.69	2.6
9349-047.1	IP449-1	130.98	78.55	0.61958	0.01298	106	10	0.00013747	3.125e-05	0.00238	0.00054	0.16594	0.00409	0.17564	0.00628	0.6558	0.00998	24.1771	1.42251	0.26738	0.0147	0.3754	3250.82	38.97	3290.74	89.07	1.2
9349-048.1	IP449-1	109.86	131.3	1.23464	0.02642	63	0	8.74e-06	3.209e-05	0.00015	0.00056	0.3658	0.00397	0.12908	0.00367	0.43565	0.00663	9.21025	0.17811	0.15333	0.00156	0.8532	2331.15	29.86	2383.41	17.42	2.2
9349-049.1	IP449-1	287.18	116.78	0.42007	0.00891	100	15	0.00018198	4.718e-05	0.00315	0.00082	0.12089	0.0022	0.09439	0.00291	0.32798	0.00425	5.15095	0.08619	0.1139	0.00104	0.842	1828.58	20.65	1862.62	16.52	1.8
9349-050.1	IP449-1	150.95	63.31	0.4333	0.00913	80	6	0.0001008	4.297e-05	0.00175	0.00074	0.12324	0.00224	0.13566	0.00418	0.47695	0.00631	11.459	0.17688	0.17425	0.00113	0.909	2513.98	27.58	2598.88	10.85	3.3
9349-051.1	IP449-1	187.6	59.24	0.32622	0.00684	62	62	0.00118226	0.00017925	0.02049	0.00311	0.08553	0.00744	0.08345	0.00758	0.3183	0.00505	5.3317	0.16214	0.12149	0.00292	0.6208	1781.41	24.75	1978.18	43.43	9.9
9349-052.1	IP449-1	70.45	46.55	0.68252	0.01491	24	3	0.00016854	0.00016496	0.00292	0.00286	0.19645	0.00713	0.08736	0.00393	0.30351	0.00457	4.52456	0.14152	0.10812	0.00277	0.5838	1708.67	22.64	1767.98	47.5	3.4
9349-054.1	IP449-1	193.39	87.34	0.46652	0.01022	98	24	0.00032298	6.187e-05	0.0056	0.00107	0.13403	0.00291	0.129	0.00436	0.44903	0.00619	10.8267	0.17905	0.17487	0.00133	0.8906	2390.94	27.59	2604.82	12.69	8.2
9349-055.1	IP449-1	162.77	28.91	0.18349	0.00399	73	4	5.964e-05	2.727e-05	0.00103	0.00047	0.05243	0.00274	0.12411	0.00721	0.43433	0.00573	9.01137	0.13855	0.15048	0.00097	0.9097	2325.2	25.78	2351.36	11.04	1.1
9349-057.1	IP449-1	55.94	71.77	1.32537	0.02888	21	1	7.195e-05	0.00011065	0.00125	0.00192	0.39356	0.0115	0.08699	0.00342	0.29296	0.00433	4.39938	0.12808	0.10892	0.00254	0.608	1656.28	21.64	1781.35	43.1	7
9349-058.1	IP449-1	73.97	123	1.71781	0.03846	54	4	0.00012637	5.239e-05	0.00219	0.00091	0.46636	0.0068	0.1384	0.00426	0.50978	0.00779	13.3875	0.24586	0.19046	0.00161	0.8893	2655.71	33.33	2746.16	13.99	3.3
9349-060.1	IP449-1	33.29	38.79	1.20378	0.03208	13	2	0.00026005	0.0003501	0.00451	0.00607	0.36713	0.01565	0.09012	0.00479	0.29549	0.00513	4.48567	0.27615	0.1101	0.00627	0.3975	1668.9	25.57	1801.04	107.35	7.3
9349-061.1	IP449-1	89.16	49.31	0.57134	0.01456	30	3	0.00011657	9.614e-05	0.00202	0.00167	0.16708	0.00494	0.08871	0.0037	0.30337	0.00443	4.47521	0.10612	0.10699	0.00181	0.7049	1707.98	21.94	1748.78	31.37	2.3
9349-062.1	IP449-1	49.79	46.39	0.96258	0.02275	29	2	9.983e-05	6.006e-05	0.00173	0.00104	0.27429	0.00791	0.13188	0.00531	0.4628	0.00703	10.5042	0.2135	0.16461	0.00193	0.8199	2451.92	31.07	2503.61	19.87	2.1
9349-065.1	IP449-1	99.24	74.19	0.77231	0.01664	53	3	7.499e-05	4.815e-05	0.0013	0.00083	0.2155	0.00331	0.12559	0.00377	0.4501	0.00638	9.99296	0.20294	0.16102	0.00207	0.7774	2395.7	28.43	2466.42	21.91	2.9
9349-066.1	IP449-1	75.35	60.34	0.82725	0.01904	42	4	0.00012542	5.956e-05	0.00217	0.00103	0.23556	0.00391	0.13054	0.00416	0.45843	0.00662	10.1948	0.21803	0.16129	0.00227	0.7578	2432.61	29.34	2469.23	23.95	1.5
9349-067.1	IP449-1	110.22	75.41	0.7068	0.01729	63	2	3.84e-05	1.757e-05	0.00067	0.0003	0.19409	0.00261	0.13283	0.00409	0.48371	0.00626	11.7382	0.17802	0.176	0.00114	0.9065	2543.41	27.25	2615.53	10.78	2.8
9349-069.1	IP449-1	83.16	50.53	0.62773	0.0135	33	4	0.00016747	6.432e-05	0.0029	0.00111	0.18791	0.00499	0.10625	0.00395	0.35495	0.0052	5.98308	0.149	0.12225	0.00225	0.6809	1958.19	24.8	1989.36	33.06	1.6
9349-070.1	IP449-1	58.47	41.54	0.73386	0.01615	29	3	0.00011836	0.00010617	0.00205	0.00184	0.21431	0.00542	0.12342	0.0045	0.42264	0.006	8.88697	0.18417	0.1525	0.00205	0.7657	2272.47	27.23	2374.18	23.09	4.3
9349-071.1	IP449-1	60.23	63.29	1.08562	0.02824	27	2	0.000114	8.689e-05	0.00198	0.00151	0.33398	0.00808	0.11023	0.00435	0.35831	0.00618	6.00705	0.16465	0.12159	0.00234	0.7171	1974.17	29.4	1979.69	34.69	0.3
9349-073.1	IP449-1	128.92	52.04	0.41698	0.00888	66	1	2.456e-05	3.851e-05	0.00043	0.00067	0.11431	0.00339	0.12836	0.00504	0.4682	0.00676	10.5892	0.18836	0.16403	0.00143	0.8732	2475.67	29.75	2497.66	14.79	0.9
9349-074.1	IP449-1	61.21	575.44	9.71249	0.21703	144	1	1.763e-05	2.984e-05	0.00031	0.00052	2.62669	0.02658	0.18668	0.0056	0.69028	0.01192	29.7663	0.62055	0.31275	0.00304	0.8866	3383.68	45.62	3534.56	15.06	4.3
9349-075.1	IP449-1	78.8	75.32	0.98738	0.02115	42	9	0.00031034	7.529e-05	0.00538	0.0013	0.29253	0.0046	0.12512	0.00377	0.42232	0.00601	9.15766	0.16803	0.15727	0.00156	0.8434	2271.02	27.3	2426.49	16.95	6.4
9349-076.1	IP449-1	104.64	72.77	0.71843	0.01533	41	4	0.00012236	5.629e-05	0.00212	0.00098	0.19786	0.0035	0.09602	0.00307	0.34863	0.00554	5.82426	0.1307	0.12116	0.00169	0.7865	1928.07	26.55	1973.42	25.11	2.3
9349-077.1	IP449-1	48.51	25.67	0.54663	0.01285	16	0	1e-05	1e-05	0.00017	0.00017	0.16967	0.00395	0.09454	0.0036	0.30458	0.00575	4.488	0.10213	0.10687	0.00113	0.8874	1714	28.47	1746.66	19.5	1.9
9349-078.1	IP449-1	151.2	106.19	0.72552	0.01548	94	4	5.803e-05	4.63e-05	0.00101	0.0008	0.19838	0.00298	0.14178	0.00437	0.51851	0.00851	13.5453	0.38615	0.18947	0.00404	0.6695	2692.85	36.24	2737.53	35.56	1.6
9349-079.1	IP449-1	44.91	24.95	0.57389	0.01525	16	6	0.00047749	0.00033986	0.00828	0.00589	0.16549	0.01557	0.0952	0.0098	0.33012	0.01065	5.09477	0.31487	0.11193	0.00547	0.6208	1838.97	51.83	1831	91.25	-0.4
9349-080.1	IP449-1	30.85	35.53	1.18991	0.0271	12	7	0.00090134	0.00026611	0.01562	0.00461	0.33704	0.01273	0.08669	0.0041	0.30607	0.00526	4.264	0.22513	0.10104	0.00483	0.4387	1721.33	26.02	1643.32	91.46	-4.7
9349-082.1	IP449-1	280.99	174.65	0.64207	0.01325	142	4	3.793e-05	1.503e-05	0.00066	0.00026	0.18372	0.0037	0.12576	0.00404	0.4395	0.00622	9.28432	0.1488	0.15321	0.00091	0.9292	2348.39	27.9	2382.09	10.21	1.4
9349-084.1	IP449-1	131.32	62	0.48776	0.01042	52	3	7.485e-05	4.014e-05	0.0013	0.0007	0.13769	0.00267	0.10334	0.00331	0.36605	0.00511	6.29469	0.18707	0.12472	0.00306	0.5727	2010.81	24.15	2024.79	44.15	0.7
9349-085.1	IP449-1	48.01	32.42	0.6976	0.01833	17	3	0.0002131	0.00013368	0.00369	0.00232	0.1994	0.00686	0.08771	0.00408	0.30684	0.00523	4.53561	0.14823	0.10721	0.00277	0.62	1725.16	25.83	1752.44	48.07	1.6
9349-087.1	IP449-1	50.27	43.22	0.8882	0.02239	31	6	0.00027152	0.00010553	0.00471	0.00183	0.2394	0.00589	0.13619	0.00518	0.50528	0.00721	12.5027	0.24543	0.17946	0.00212	0.8022	2636.46	30.96	2647.89	19.73	0.4
9349-088.1	IP449-1	103.12	79.63	0.79766	0.01937	52	2	4.042e-05	3.18e-05	0.0007	0.00055	0.22674	0.00311	0.12059	0.00375	0.42421	0.00581	8.70999	0.14578	0.14892	0.0012	0.8786	2279.55	26.36	2333.51	13.86	2.3
9349-089.1	IP449-1	32.07	28.02	0.90235	0.0231	19	4	0.00029625	0.00016802	0.00513	0.00291	0.25192	0.00829	0.13375	0.00608	0.4791	0.0087	11.1458	0.31728	0.16873	0.00333	0.7249	2523.32	38.04	2545.07	33.51	0.9
9349-090.1	IP449-1	116.37	160.25	1.4226	0.03366	53	8	0.00023039	0.0001244	0.00399	0.00216	0.42546	0.00633	0.10151	0.00315	0.33942	0.00459	5.49877	0.13086	0.1175	0.00211	0.6628	1883.9	22.13	1918.48	32.57	1.8
9349-091.1	IP449-1	54.66	64.24	1.21403	0.02947	21	4	0.00029084	0.00025567	0.00504	0.00443	0.35862	0.01328	0.08919	0.00423	0.30195	0.00508	4.38299	0.21333	0.10528	0.00459	0.4574	1700.96	25.18	1719.17	82.4	1.1
9349-092.1	IP449-1	101.18	128.88	1.31587	0.02947	44	3	0.00010028	6.641e-05	0.00174	0.00115	0.37408	0.00511	0.09702	0.00287	0.34129	0.00467	5.49202	0.10796	0.11671	0.00146	0.7762	1892.9	22.51	1906.41	22.61	0.7
9349-137.1	IP449-1	24.33	38.03	1.61494	0.03972	10	3	0.00048527	0.0002884	0.00841	0.005	0.47229	0.01686	0.0912	0.00453	0.31183	0.00754	4.61836	0.28683	0.10742	0.00583	0.4983	1749.71	37.14	1756.03	102.73	0.4
07RAT-11
9350-002.1	IP452-1	160.56	128.94	0.82962	0.01999	96	1	1e-05	1e-05	0.00017	0.00017	0.22508	0.0041	0.13283	0.00457	0.48959	0.00808	12.6201	0.28002	0.18695	0.00241	0.8168	2568.88	35.08	2715.54	21.43	5.4
9350-003.1	IP452-1	257.47	198.22	0.79531	0.01657	142	3	3.4e-05	2.249e-05	0.00059	0.00039	0.21824	0.00203	0.12747	0.00336	0.46451	0.00611	10.3051	0.1919	0.1609	0.00187	0.784	2459.44	26.93	2465.14	19.82	0.2
9350-005.1	IP452-1	27.36	14.76	0.55736	0.01681	16	24	0.00188868	0.0003358	0.03273	0.00582	0.12453	0.0137	0.11702	0.01359	0.52377	0.01123	15.0836	0.59361	0.20886	0.00635	0.6416	2715.15	47.7	2896.75	50.22	6.3
9350-006.1	IP452-1	243.47	114.79	0.48705	0.01056	122	4	4.765e-05	2.747e-05	0.00083	0.00048	0.13746	0.00185	0.12636	0.00354	0.44775	0.00518	9.85216	0.14741	0.15959	0.0013	0.8418	2385.24	23.12	2451.28	13.84	2.7
9350-007.1	IP452-1	201.38	124.28	0.63755	0.01344	107	3	4.289e-05	1.996e-05	0.00074	0.00035	0.17408	0.0019	0.12579	0.00332	0.46068	0.00535	10.4168	0.16506	0.164	0.00155	0.8074	2442.57	23.66	2497.28	15.96	2.2
9350-008.1	IP452-1	113.71	114.95	1.0444	0.02268	46	3	9.606e-05	5.914e-05	0.00166	0.00102	0.30873	0.00466	0.09777	0.00292	0.33075	0.0046	5.2959	0.11072	0.11613	0.00162	0.749	1842.03	22.33	1897.45	25.32	2.9
9350-009.1	IP452-1	97.84	66.18	0.69874	0.01541	50	5	0.00014818	9.363e-05	0.00257	0.00162	0.18361	0.0058	0.11505	0.00491	0.43783	0.00804	10.0676	0.28116	0.16677	0.00315	0.7417	2340.9	36.13	2525.51	32.05	7.3
9350-010.1	IP452-1	227.51	90.5	0.41095	0.00952	80	3	4.469e-05	2.167e-05	0.00077	0.00038	0.12307	0.00185	0.09952	0.00314	0.33231	0.00506	5.23418	0.09668	0.11424	0.001	0.883	1849.56	24.51	1867.88	15.85	1
9350-013.1	IP452-1	43.36	29.99	0.7144	0.01909	25	2	0.00010128	0.00017456	0.00176	0.00303	0.19608	0.00802	0.13116	0.00696	0.47789	0.00988	11.7504	0.45725	0.17833	0.00544	0.6291	2518.06	43.23	2637.4	51.55	4.5
9350-014.1	IP452-1	133.21	63.13	0.48956	0.01095	48	0	4.03e-06	5.499e-05	7e-05	0.00095	0.14072	0.00306	0.09674	0.00331	0.33654	0.00469	5.38264	0.10751	0.116	0.00147	0.7776	1870.01	22.68	1895.46	22.94	1.3
9350-015.1	IP452-1	187.88	87.26	0.47979	0.01044	83	2	2.366e-05	1.609e-05	0.00041	0.00028	0.1353	0.01767	0.1129	0.02088	0.40036	0.05173	7.82224	6.11015	0.1417	0.1069	0.2861	2170.71	242.66	2248.11	2972.35	3.4
9350-016.1	IP452-1	227.12	87.06	0.39598	0.02011	63	45	0.00081317	0.00024106	0.01409	0.00418	0.03635	0.00915	0.02585	0.00671	0.2816	0.01016	4.06016	0.22667	0.10457	0.00401	0.7321	1599.44	51.31	1706.74	72.27	6.3
9350-018.1	IP452-1	20.96	17.89	0.88162	0.03638	12	4	0.00043179	0.0001681	0.00748	0.00291	0.24647	0.02111	0.13332	0.01362	0.47688	0.0178	10.5473	0.596	0.16041	0.0061	0.7445	2513.66	78.15	2459.98	65.73	-2.2
9350-020.1	IP452-1	187.49	127.17	0.70069	0.01523	72	5	9.336e-05	4.084e-05	0.00162	0.00071	0.19984	0.00277	0.09604	0.00285	0.33674	0.00493	5.44226	0.11063	0.11721	0.00145	0.7968	1870.97	23.83	1914.18	22.39	2.3
9350-023.1	IP452-1	67.07	15.18	0.2338	0.00697	24	0	1e-05	1e-05	0.00017	0.00017	0.06493	0.00227	0.09649	0.0048	0.34743	0.0066	5.76264	0.152	0.1203	0.00193	0.7965	1922.29	31.66	1960.64	28.97	2
9350-025.1	IP452-1	356.44	223.55	0.64792	0.01429	141	3	2.454e-05	2.053e-05	0.00043	0.00036	0.18973	0.00197	0.10299	0.00287	0.35169	0.00478	5.77013	0.09273	0.119	0.00084	0.9003	1942.65	22.83	1941.19	12.67	-0.1
9350-026.1	IP452-1	180.27	113.06	0.64788	0.01448	87	1	1e-05	1e-05	0.00017	0.00017	0.17701	0.00216	0.11584	0.00331	0.42401	0.00549	8.74262	0.15318	0.14954	0.00154	0.8124	2278.65	24.9	2340.71	17.73	2.7
9350-027.1	IP452-1	55.5	61.8	1.15039	0.02655	23	0	6.5e-06	0.0002465	0.00011	0.00427	0.33176	0.01113	0.09584	0.00424	0.33233	0.00573	5.1314	0.22556	0.11199	0.00429	0.5011	1849.66	27.77	1831.9	71.16	-1
9350-028.1	IP452-1	772.07	522.5	0.69912	0.01471	287	22	0.0001014	1.733e-05	0.00176	0.0003	0.19678	0.0026	0.0925	0.00276	0.32865	0.00542	5.27362	0.10447	0.11638	0.00106	0.8895	1831.84	26.33	1901.32	16.48	3.7
9350-029.1	IP452-1	203.18	115.75	0.58856	0.01256	77	3	4.431e-05	1.965e-05	0.00077	0.00034	0.16616	0.00337	0.09662	0.00313	0.34223	0.00458	5.42143	0.11026	0.11489	0.00158	0.7427	1897.37	22.04	1878.24	24.95	-1
9350-031.1	IP452-1	138.62	49.47	0.36865	0.0097	108	1	1e-05	1e-05	0.00017	0.00017	0.10029	0.00155	0.17855	0.00613	0.65636	0.01032	25.328	0.48763	0.27987	0.0026	0.8775	3253.01	40.31	3362.21	14.61	3.2
9350-033.1	IP452-1	378.43	29.89	0.0816	0.00191	211	2	1e-05	1e-05	0.00017	0.00017	0.02441	0.00088	0.16065	0.00715	0.53709	0.00643	13.5173	0.5227	0.18253	0.00644	0.4237	2771.27	27.03	2676	59.64	-3.6
9350-034.1	IP452-1	137.34	37.56	0.28251	0.00641	73	4	6.08e-05	2.598e-05	0.00105	0.00045	0.07716	0.00227	0.13583	0.00533	0.49731	0.00632	11.8469	0.19346	0.17277	0.00152	0.8453	2602.21	27.26	2584.7	14.76	-0.7
9350-035.1	IP452-1	127.57	266.46	2.15774	0.04667	97	2	4.54e-05	2.424e-05	0.00079	0.00042	0.59382	0.03776	0.13705	0.00945	0.49798	0.00783	12.0209	0.25476	0.17507	0.00217	0.8147	2605.13	33.77	2606.74	20.78	0.1
9350-036.1	IP452-1	162.66	96.58	0.6134	0.01416	58	1	1.715e-05	3.404e-05	0.0003	0.00059	0.16885	0.0028	0.08917	0.00281	0.32394	0.00439	5.02053	0.11317	0.11241	0.00184	0.6919	1808.93	21.4	1838.66	30	1.6
9350-038.1	IP452-1	85.4	34.08	0.41228	0.0114	47	2	4.856e-05	6.738e-05	0.00084	0.00117	0.1178	0.00334	0.1419	0.00598	0.49662	0.00716	12.1039	0.23702	0.17677	0.00204	0.8102	2599.26	30.92	2622.76	19.37	0.9
9350-039.1	IP452-1	226.51	264.87	1.208	0.02689	153	1	9.98e-06	1.343e-05	0.00017	0.00023	0.32739	0.00232	0.14068	0.00366	0.51909	0.00596	13.2581	0.17641	0.18524	0.00101	0.9136	2695.32	25.33	2700.36	9.03	0.2
9350-041.1	IP452-1	125.48	88.22	0.72632	0.01714	52	1	2.061e-05	3.823e-05	0.00036	0.00066	0.20645	0.00379	0.10203	0.00338	0.35895	0.00514	6.0416	0.11542	0.12207	0.00134	0.8219	1977.19	24.45	1986.74	19.64	0.5
9350-042.1	IP452-1	140.39	108.44	0.79792	0.01737	66	3	6.845e-05	8.159e-05	0.00119	0.00141	0.23455	0.0043	0.11768	0.00367	0.40033	0.00508	7.65248	0.14598	0.13864	0.00177	0.7486	2170.58	23.42	2210.25	22.29	1.8
9350-043.1	IP452-1	29.78	77.17	2.67672	0.37391	6	17	0.00382652	0.00148107	0.06632	0.02567	0.36111	0.05973	0.02251	0.00515	0.16684	0.01232	2.55866	0.7305	0.11122	0.02966	0.3754	994.7	68.43	1819.52	584.55	45.3
9350-045.1	IP452-1	225.23	122.18	0.56041	0.01205	120	0	5.52e-06	3.198e-05	0.0001	0.00055	0.16005	0.00201	0.13293	0.00365	0.46546	0.00538	10.6557	0.14978	0.16603	0.00111	0.8816	2463.62	23.7	2518.06	11.28	2.2
9350-046.1	IP452-1	298.27	38.79	0.13435	0.00318	147	5	3.807e-05	1.241e-05	0.00066	0.00022	0.02987	0.0013	0.10582	0.00551	0.47604	0.00733	11.5276	0.71823	0.17563	0.01027	0.3645	2510.01	32.1	2612	100.82	3.9
9350-048.1	IP452-1	185.05	116.98	0.65305	0.01497	84	5	8.45e-05	3.736e-05	0.00146	0.00065	0.18754	0.00267	0.11228	0.00342	0.39099	0.0055	8.46395	0.14812	0.157	0.00138	0.8668	2127.43	25.55	2423.62	15	12.2
9350-049.1	IP452-1	128.05	82.36	0.66444	0.02643	42	9	0.00025829	8.76e-05	0.00448	0.00152	0.12775	0.00488	0.05953	0.0034	0.30959	0.00454	4.72493	0.12813	0.11069	0.00233	0.6383	1738.67	22.41	1810.79	38.72	4
9350-050.1	IP452-1	179.89	118.01	0.6777	0.01436	53	2	5.546e-05	3.898e-05	0.00096	0.00068	0.18257	0.00328	0.07163	0.00238	0.26589	0.00488	3.64704	0.08926	0.09948	0.0014	0.8213	1519.92	24.89	1614.36	26.44	5.8
9350-050.2	IP452-1	146.06	109.01	0.771	0.01723	48	4	9.845e-05	3.569e-05	0.00171	0.00062	0.2266	0.00791	0.08509	0.00369	0.28952	0.00371	3.9399	0.07633	0.0987	0.00128	0.7455	1639.11	18.58	1599.68	24.49	-2.5
9350-050.2.2	IP452-1	142.83	103.45	0.74825	0.01731	46	4	0.00011708	4.435e-05	0.00203	0.00077	0.22387	0.00329	0.0842	0.00267	0.28141	0.00448	3.81142	0.07438	0.09823	0.00093	0.8764	1598.48	22.58	1590.78	17.8	-0.5
9350-053.1	IP452-1	154.63	78.94	0.5274	0.01142	157	3	2.806e-05	2.003e-05	0.00049	0.00035	0.13612	0.00233	0.20186	0.00609	0.7821	0.00955	39.7701	0.5447	0.3688	0.0018	0.9358	3724.68	34.63	3786.51	7.4	1.6
9350-055.1	IP452-1	189.64	210.88	1.14877	0.02414	107	1	2.048e-05	2.954e-05	0.00036	0.00051	0.32587	0.00607	0.12629	0.00394	0.44519	0.00607	9.30712	0.17359	0.15162	0.00169	0.8057	2373.83	27.14	2364.33	19.13	-0.4
9350-057.1	IP452-1	112.29	101.28	0.93182	0.02201	73	3	6.384e-05	3.41e-05	0.00111	0.00059	0.26177	0.0042	0.1457	0.00459	0.51865	0.00691	13.4122	0.38162	0.18755	0.00441	0.5718	2693.43	29.41	2720.83	39.31	1
9350-058.1	IP452-1	108.09	70.42	0.67302	0.01866	62	5	0.00010862	4.742e-05	0.00188	0.00082	0.18532	0.00305	0.13405	0.00468	0.48681	0.00654	11.7463	0.26362	0.175	0.00286	0.6902	2556.85	28.44	2606.06	27.53	1.9
9350-065.1	IP452-1	290.04	71.02	0.25297	0.00567	100	3	3.622e-05	2.7e-05	0.00063	0.00047	0.07056	0.00251	0.09448	0.00422	0.33873	0.00508	5.42535	0.12764	0.11617	0.0019	0.7242	1880.55	24.5	1898.03	29.69	0.9
9350-066.1	IP452-1	141.54	86.52	0.6315	0.01426	87	6	8.887e-05	2.872e-05	0.00154	0.0005	0.17235	0.00238	0.14372	0.00426	0.52659	0.00701	13.0986	0.28018	0.18041	0.00273	0.7112	2727.06	29.68	2656.62	25.35	-2.7
9350-069.1	IP452-1	91.97	102.13	1.14722	0.03111	55	3	8.639e-05	5.678e-05	0.0015	0.00098	0.31652	0.00518	0.12929	0.00465	0.46862	0.00798	10.4976	0.26515	0.16247	0.00271	0.7564	2477.49	35.12	2481.53	28.36	0.2
9350-071.1	IP452-1	210.02	34.45	0.16943	0.00411	69	5	8.593e-05	2.851e-05	0.00149	0.00049	0.04439	0.00152	0.08616	0.00378	0.32884	0.00427	5.09607	0.13292	0.1124	0.00237	0.5992	1832.73	20.77	1838.54	38.61	0.3
9350-074.1	IP452-1	216.56	65.46	0.31229	0.00733	116	1	8.71e-06	1.468e-05	0.00015	0.00025	0.08892	0.00232	0.14028	0.00522	0.49266	0.00612	11.7383	0.1779	0.17281	0.00126	0.8796	2582.18	26.49	2585	12.18	0.1
9350-076.1	IP452-1	60.44	47.06	0.80447	0.02384	21	8	0.00047899	0.00014	0.0083	0.00243	0.2288	0.00801	0.08712	0.00438	0.30633	0.00629	4.1987	0.17581	0.09941	0.00338	0.5917	1722.64	31.1	1613.03	64.75	-6.8
9350-076.1.2	IP452-1	56.31	42.72	0.78383	0.04174	19	1	5.051e-05	7.763e-05	0.00088	0.00135	0.22323	0.00576	0.08564	0.00523	0.30072	0.00453	4.3954	0.10376	0.10601	0.00174	0.7254	1694.89	22.51	1731.83	30.35	2.1
9350-076.2	IP452-1	54.22	42.46	0.80904	0.02081	19	2	0.00015048	6.73e-05	0.00261	0.00117	0.22433	0.00926	0.08397	0.00429	0.30282	0.00475	4.48311	0.10853	0.10737	0.00178	0.7333	1705.3	23.53	1755.27	30.66	2.8
9350-076.2.2	IP452-1	53.15	40.74	0.79193	0.01866	18	2	0.00015654	0.00011227	0.00271	0.00195	0.21371	0.00632	0.07971	0.00329	0.29538	0.00487	4.3418	0.14514	0.10661	0.00289	0.5943	1668.35	24.27	1742.21	50.5	4.2
9350-077.1	IP452-1	264.51	168.55	0.65826	0.0138	144	11	9.8e-05	2.102e-05	0.0017	0.00036	0.15131	0.0017	0.11004	0.00293	0.47869	0.00575	11.469	0.16469	0.17377	0.00113	0.8933	2521.58	25.12	2594.25	10.89	2.8
9350-079.1	IP452-1	38.83	40.14	1.06794	0.03418	25	6	0.00034624	0.00023484	0.006	0.00407	0.29073	0.01356	0.1376	0.00823	0.50545	0.00984	12.5372	0.43402	0.1799	0.00473	0.6571	2637.15	42.26	2651.93	44.3	0.6
9350-080.1	IP452-1	72.02	14.85	0.21302	0.00555	39	4	0.00012651	5.096e-05	0.00219	0.00088	0.06521	0.0026	0.15287	0.00767	0.49935	0.00794	12.7561	0.26896	0.18527	0.00222	0.8253	2611	34.23	2700.64	19.95	3.3
9350-081.1	IP452-1	63.52	86.65	1.40911	0.03637	27	3	0.0001459	9.744e-05	0.00253	0.00169	0.40657	0.0086	0.09329	0.00352	0.32332	0.00567	4.94443	0.14927	0.11091	0.00249	0.6741	1805.91	27.69	1814.45	41.39	0.5
9350-083.1	IP452-1	228.49	143.94	0.65078	0.01438	123	4	4.136e-05	1.692e-05	0.00072	0.00029	0.18248	0.00482	0.13038	0.00498	0.46496	0.00767	10.411	0.24735	0.1624	0.00246	0.7737	2461.42	33.82	2480.76	25.81	0.8
9350-084.1	IP452-1	107.34	84.74	0.81552	0.01888	60	3	7.732e-05	5.322e-05	0.00134	0.00092	0.22514	0.00425	0.12857	0.00425	0.46572	0.00657	10.7862	0.21786	0.16797	0.00215	0.7778	2464.76	28.97	2537.56	21.62	2.9
9350-085.1	IP452-1	58.17	76.92	1.36596	0.04893	37	2	9.95e-05	6.024e-05	0.00172	0.00104	0.38531	0.00872	0.13333	0.00643	0.47268	0.01089	11.4343	0.39345	0.17545	0.00401	0.7523	2495.29	47.83	2610.29	38.56	4.4
9350-087.1	IP452-1	52.86	46.13	0.90159	0.02224	28	8	0.00038084	0.00011858	0.0066	0.00206	0.24877	0.00862	0.12044	0.00569	0.43648	0.00893	9.61016	0.37429	0.15968	0.0049	0.6238	2334.88	40.2	2452.32	52.85	4.8
9350-088.1	IP452-1	122.04	93.49	0.7914	0.0182	53	1	1.75e-05	4.616e-05	0.0003	0.0008	0.22636	0.00735	0.10711	0.00455	0.37447	0.00559	6.65193	0.13353	0.12883	0.00151	0.8163	2050.4	26.27	2082.12	20.71	1.5
9350-089.1	IP452-1	231.04	48.69	0.2177	0.00644	113	0	4.5e-07	1.819e-05	1e-05	0.00032	0.06459	0.00429	0.13647	0.01303	0.45995	0.02848	11.1683	3.06957	0.17611	0.04582	0.3436	2439.33	126.98	2616.55	514.64	6.8
9350-090.1	IP452-1	111.49	75	0.69496	0.01684	48	10	0.00026788	6.128e-05	0.00464	0.00106	0.11221	0.00349	0.06325	0.00274	0.39172	0.00702	9.18415	0.26887	0.17005	0.00357	0.7017	2130.79	32.59	2558.09	35.62	16.7
9350-091.1	IP452-1	165.36	46.23	0.28879	0.00718	83	8	0.00011273	3.409e-05	0.00195	0.00059	0.07486	0.0018	0.12183	0.0045	0.46995	0.00601	10.5236	0.16778	0.16241	0.00131	0.8651	2483.34	26.41	2480.91	13.66	-0.1
9350-093.1	IP452-1	217.87	143.22	0.67908	0.01584	129	2	2.633e-05	3.309e-05	0.00046	0.00057	0.17117	0.00204	0.12759	0.00367	0.50619	0.00598	12.9387	0.18788	0.18539	0.00131	0.875	2640.35	25.66	2701.65	11.74	2.3
9350-096.1	IP452-1	61.56	68.9	1.15618	0.02655	41	3	0.00010281	4.103e-05	0.00178	0.00071	0.33009	0.00522	0.14396	0.00474	0.50424	0.00882	12.834	0.29524	0.1846	0.00238	0.8306	2632.01	37.91	2694.6	21.49	2.3
9350-097.1	IP452-1	120.73	39.05	0.3341	0.00771	40	5	0.00015621	5.546e-05	0.00271	0.00096	0.0978	0.00407	0.09309	0.00465	0.31801	0.00478	4.82903	0.10543	0.11013	0.00155	0.7696	1780.01	23.45	1801.6	25.78	1.2
9350-099.1	IP452-1	77.65	88.43	1.17646	0.02628	50	0	1e-05	1e-05	0.00017	0.00017	0.33753	0.00658	0.14201	0.00498	0.49498	0.00924	12.7134	0.32464	0.18628	0.00284	0.8055	2592.19	39.96	2709.61	25.38	4.3
9350-101.1	IP452-1	71.67	60.04	0.86545	0.02406	38	3	0.00010444	4.869e-05	0.00181	0.00084	0.21242	0.00434	0.11011	0.00444	0.44862	0.00933	10.3501	0.26645	0.16733	0.00214	0.87	2389.12	41.65	2531.07	21.63	5.6
9350-102.1	IP452-1	69.96	52.02	0.7681	0.01868	45	0	1e-05	1e-05	0.00017	0.00017	0.21848	0.00361	0.14964	0.005	0.52607	0.00834	13.5888	0.87379	0.18734	0.01131	0.3638	2724.86	35.31	2718.99	103.13	-0.2
9350-109.1	IP452-1	260.11	74.3	0.29511	0.00737	88	3	4.692e-05	2.45e-05	0.00081	0.00042	0.08677	0.00236	0.09621	0.00374	0.32721	0.00393	5.07406	0.09053	0.11247	0.00132	0.7564	1824.84	19.14	1839.67	21.45	0.8
9350-112.1	IP452-1	66.14	30.15	0.47091	0.01399	42	4	0.00012207	4.822e-05	0.00212	0.00084	0.12631	0.00326	0.14907	0.00651	0.5558	0.01051	15.1194	0.36982	0.19729	0.00263	0.841	2849.25	43.68	2803.94	21.98	-1.6
9350-114.1	IP452-1	235.05	206.02	0.90547	0.0197	96	2	2.288e-05	2.422e-05	0.0004	0.00042	0.26203	0.00386	0.0993	0.00313	0.34314	0.00599	5.75845	0.1295	0.12171	0.00148	0.8442	1901.78	28.83	1981.45	21.79	4
07RAT-31
9351-001.1	IP449-1	157.25	147.09	0.96631	0.02009	70	7	0.00014108	3.709e-05	0.00245	0.00064	0.27709	0.00505	0.10542	0.00323	0.36765	0.00481	6.52715	0.10295	0.12876	0.00094	0.8877	2018.34	22.72	2081.13	12.94	3
9351-002.1	IP449-1	286.76	45.11	0.1625	0.00499	124	5	5.24e-05	2.89e-05	0.00091	0.0005	0.04572	0.00138	0.11865	0.00555	0.42174	0.00774	8.68625	0.18586	0.14938	0.00133	0.9103	2268.36	35.21	2338.83	15.36	3
9351-003.1	IP449-1	119.71	94.43	0.81486	0.01841	96	3	4.556e-05	2.712e-05	0.00079	0.00047	0.22428	0.00247	0.17339	0.00491	0.62998	0.00825	21.8653	0.32535	0.25173	0.00141	0.9273	3149.49	32.71	3195.66	8.91	1.4
9351-004.1	IP449-1	115.44	50.28	0.44993	0.00996	60	5	0.00010496	3.822e-05	0.00182	0.00066	0.12701	0.00386	0.13128	0.00523	0.46505	0.0061	10.5115	0.16181	0.16393	0.00108	0.9054	2461.8	26.89	2496.64	11.14	1.4
9351-005.1	IP449-1	234.52	161.92	0.71326	0.01524	93	8	0.00011052	7.086e-05	0.00192	0.00123	0.20223	0.00318	0.09906	0.00292	0.34939	0.0045	5.86194	0.10175	0.12168	0.00123	0.8146	1931.7	21.52	1981.03	18.18	2.5
9351-006.1	IP449-1	145.57	88.44	0.6276	0.01351	71	2	4.332e-05	2.579e-05	0.00075	0.00045	0.17801	0.00349	0.1214	0.00386	0.42801	0.00548	8.83727	0.12759	0.14975	0.00079	0.9319	2296.73	24.77	2343.06	9.05	2
9351-008.1	IP449-1	229.71	192.6	0.86615	0.02192	90	8	0.00011614	5.473e-05	0.00201	0.00095	0.11024	0.00385	0.04617	0.00214	0.36273	0.00623	7.59156	0.88679	0.15179	0.01722	0.2684	1995.1	29.53	2366.2	207.68	15.7
9351-009.1	IP449-1	218.94	47.42	0.22373	0.00488	92	9	0.00011671	2.655e-05	0.00202	0.00046	0.06224	0.00137	0.11257	0.00381	0.40466	0.00556	8.1204	0.12596	0.14554	0.00083	0.9315	2190.47	25.56	2294.18	9.81	4.5
9351-010.1	IP449-1	272.77	54.48	0.20633	0.00463	124	5	5.158e-05	3.276e-05	0.00089	0.00057	0.05923	0.00189	0.12505	0.00521	0.43559	0.00639	9.24428	0.15499	0.15392	0.001	0.9235	2330.85	28.77	2389.95	11.07	2.5
9351-012.1	IP449-1	166.07	163.23	1.01537	0.02115	88	4	6.196e-05	2.518e-05	0.00107	0.00044	0.28634	0.0025	0.12154	0.00325	0.43099	0.00617	8.78986	0.13857	0.14792	0.00075	0.9478	2310.16	27.84	2321.98	8.71	0.5
9351-013.1	IP449-1	144.29	62.06	0.44431	0.0099	73	2	3.313e-05	3.413e-05	0.00057	0.00059	0.12922	0.00432	0.13219	0.00594	0.45453	0.00913	10.3248	0.2378	0.16475	0.00149	0.9209	2415.34	40.58	2504.99	15.3	3.6
9351-014.1	IP449-1	220.35	70.97	0.33274	0.0069	114	5	5.892e-05	2.169e-05	0.00102	0.00038	0.09168	0.00133	0.13119	0.00384	0.47612	0.00702	11.3274	0.18785	0.17255	0.00103	0.9344	2510.35	30.74	2582.52	9.98	2.8
9351-016.1	IP449-1	210.15	68.04	0.33449	0.00702	105	6	7.682e-05	1.93e-05	0.00133	0.00033	0.09221	0.00216	0.12735	0.00431	0.46196	0.00577	10.5187	0.1574	0.16514	0.00113	0.8915	2448.22	25.48	2508.98	11.54	2.4
9351-017.1	IP449-1	848.34	121.68	0.14817	0.00308	73	19	0.00033456	5.378e-05	0.0058	0.00093	0.14732	0.00359	0.07573	0.00269	0.07617	0.00116	1.8029	0.03325	0.17166	0.00147	0.887	473.23	6.98	2573.92	14.41	81.6
9351-018.1	IP449-1	207.68	90.14	0.44839	0.01016	97	4	4.839e-05	2.465e-05	0.00084	0.00043	0.12777	0.00182	0.12128	0.00363	0.42562	0.00568	8.69658	0.13497	0.14819	0.00095	0.9115	2285.93	25.73	2325.18	11.07	1.7
9351-019.1	IP449-1	399.39	283.5	0.7333	0.01546	156	18	0.00015673	3.045e-05	0.00272	0.00053	0.18359	0.0023	0.08205	0.00306	0.32772	0.00923	9.16188	0.2761	0.20276	0.00157	0.967	1827.32	44.98	2848.54	12.67	35.9
9351-020.1	IP449-1	60	17.88	0.30793	0.00805	32	3	0.00012785	6.911e-05	0.00222	0.0012	0.07883	0.00468	0.12623	0.00852	0.49305	0.00915	12.002	0.25713	0.17655	0.00152	0.9168	2583.87	39.64	2620.7	14.41	1.4
9351-021.1	IP449-1	317.3	241.91	0.78762	0.01669	159	4	3.454e-05	1.479e-05	0.0006	0.00026	0.22207	0.00153	0.11954	0.00305	0.42396	0.00525	8.75699	0.11575	0.14981	0.0005	0.9687	2278.43	23.83	2343.71	5.66	2.8
9351-022.1	IP449-1	53.54	23.71	0.45741	0.01029	30	2	0.00010108	4.83e-05	0.00175	0.00084	0.12682	0.00316	0.13985	0.00512	0.50439	0.00743	12.5904	0.23197	0.18104	0.0017	0.8629	2632.65	31.9	2662.4	15.64	1.1
9351-023.1	IP449-1	70.14	99.61	1.46704	0.03153	33	8	0.0003679	9.222e-05	0.00638	0.0016	0.41774	0.00687	0.10149	0.00316	0.3564	0.00546	5.90613	0.13948	0.12019	0.00194	0.7344	1965.1	26.01	1959.01	29.12	-0.3
9351-024.1	IP449-1	222.1	93.88	0.43666	0.00911	109	1	1.347e-05	1.45e-05	0.00023	0.00025	0.11736	0.00132	0.11892	0.00322	0.44247	0.0058	10.7087	0.15132	0.17553	0.00068	0.9623	2361.68	25.98	2611.09	6.47	9.6
9351-025.1	IP449-1	76.62	111.76	1.507	0.03565	45	2	6.477e-05	5.968e-05	0.00112	0.00103	0.44083	0.00513	0.12465	0.00372	0.42611	0.00599	8.85804	0.1591	0.15077	0.00144	0.8488	2288.17	27.12	2354.67	16.44	2.8
9351-028.1	IP449-1	184.2	102.67	0.5758	0.01189	81	2	2.978e-05	2.4e-05	0.00052	0.00042	0.16625	0.00194	0.11349	0.0031	0.39305	0.00533	7.4028	0.15547	0.1366	0.00197	0.7314	2136.94	24.7	2184.54	25.33	2.2
9351-029.1	IP449-1	209.01	206.12	1.01876	0.02259	113	8	0.00010437	3.337e-05	0.00181	0.00058	0.29064	0.00316	0.12372	0.00364	0.43366	0.00696	9.09375	0.15999	0.15209	0.00083	0.951	2322.19	31.36	2369.53	9.38	2
9351-030.1	IP449-1	169.34	233.43	1.424	0.03519	116	6	8.601e-05	2.467e-05	0.00149	0.00043	0.41619	0.00652	0.14507	0.00588	0.49634	0.0139	12.8033	0.43005	0.18709	0.00287	0.8911	2598.05	60.18	2716.71	25.55	4.4
9351-032.1	IP449-1	221.69	84.61	0.39425	0.00812	82	5	6.848e-05	3.693e-05	0.00119	0.00064	0.11434	0.002	0.1008	0.00312	0.34756	0.00524	5.80495	0.11357	0.12114	0.0013	0.8386	1922.92	25.09	1973.01	19.27	2.5
9351-033.1	IP449-1	196.25	130.02	0.68441	0.01559	103	16	0.00021748	5.366e-05	0.00377	0.00093	0.19434	0.00541	0.12681	0.00535	0.4466	0.00983	10.2216	0.24496	0.16599	0.00118	0.9555	2380.13	43.95	2517.65	12.03	5.5
9351-034.1	IP449-1	125.12	154.88	1.27878	0.02799	69	1	1.98e-05	7.285e-05	0.00034	0.00126	0.37338	0.00784	0.12205	0.00414	0.41801	0.00632	8.84805	0.16342	0.15352	0.00136	0.8788	2251.45	28.8	2385.47	15.21	5.6
9351-036.1	IP449-1	51.23	71.99	1.45165	0.0549	23	4	0.00024757	0.00018347	0.00429	0.00318	0.4276	0.01103	0.09861	0.00504	0.33476	0.00759	5.45279	0.2156	0.11814	0.00351	0.6676	1861.39	36.78	1928.25	54.13	3.5
9351-037.1	IP449-1	83.39	54.46	0.67462	0.01496	41	7	0.00024129	9.748e-05	0.00418	0.00169	0.18507	0.00471	0.11806	0.0046	0.43034	0.00838	8.76309	0.21604	0.14769	0.0019	0.8552	2307.26	37.88	2319.31	22.25	0.5
9351-039.1	IP449-1	70.37	55.36	0.81278	0.0179	27	8	0.00039629	0.0001544	0.00687	0.00268	0.229	0.00789	0.09377	0.00471	0.33279	0.00971	5.58275	0.21882	0.12167	0.00277	0.8172	1851.91	47.15	1980.81	41.1	6.5
9351-040.1	IP449-1	42.24	50.38	1.23222	0.02932	29	5	0.00024579	7.681e-05	0.00426	0.00133	0.34422	0.00577	0.14393	0.00477	0.51524	0.00818	13.5863	0.27848	0.19124	0.00213	0.8422	2678.98	34.88	2752.89	18.42	2.7
9351-041.1	IP449-1	97.59	127.38	1.34848	0.03196	31	12	0.00050862	0.00025413	0.00881	0.0044	0.15073	0.01077	0.03231	0.00265	0.28907	0.00941	4.87538	0.28874	0.12232	0.00558	0.6457	1636.89	47.22	1990.36	83.37	17.8
9351-042.1	IP449-1	469.75	307.79	0.67689	0.02169	55	17	0.00040071	4.949e-05	0.00694	0.00086	0.17848	0.00439	0.02683	0.00202	0.10176	0.00648	2.22628	0.14481	0.15868	0.00117	0.9936	624.7	38.04	2441.61	12.56	74.4
9351-043.1	IP449-1	268.25	217.39	0.8372	0.01773	123	11	0.00012002	3.82e-05	0.00208	0.00066	0.16418	0.00202	0.07828	0.00223	0.39917	0.00582	9.09206	0.1527	0.1652	0.00111	0.9182	2165.2	26.88	2509.58	11.32	13.7
9351-044.1	IP449-1	55.69	97.67	1.81179	0.04339	46	3	0.00011755	4.905e-05	0.00204	0.00085	0.49455	0.00663	0.15275	0.005	0.55962	0.00996	16.2629	0.34767	0.21077	0.00207	0.8897	2865.04	41.28	2911.47	16.03	1.6
9351-045.1	IP449-1	135.85	93.88	0.71395	0.01489	62	3	7.558e-05	3.193e-05	0.00131	0.00055	0.20994	0.00305	0.11654	0.00337	0.39631	0.00547	7.4323	0.11787	0.13601	0.00085	0.92	2152.04	25.31	2177.05	10.95	1.1
9351-046.1	IP449-1	114.36	82.58	0.74599	0.01634	57	9	0.00020858	7.724e-05	0.00361	0.00134	0.21274	0.00461	0.12108	0.00414	0.42458	0.00628	8.90583	0.16617	0.15213	0.00147	0.8576	2281.22	28.48	2370.01	16.59	3.7
9351-047.1	IP449-1	210.56	135.2	0.66333	0.01476	121	5	5.557e-05	3.631e-05	0.00096	0.00063	0.18775	0.00203	0.13797	0.00388	0.48746	0.00651	11.8421	0.17423	0.17619	0.00083	0.9481	2559.67	28.29	2617.36	7.87	2.2
9351-048.1	IP449-1	319.83	156.37	0.50509	0.01062	125	5	4.623e-05	1.515e-05	0.0008	0.00026	0.1491	0.00202	0.1054	0.00298	0.35707	0.00472	6.05015	0.10333	0.12289	0.00114	0.8418	1968.28	22.46	1998.58	16.6	1.5
9351-049.1	IP449-1	139.03	69.4	0.51564	0.01077	106	6	8.229e-05	3.599e-05	0.00143	0.00062	0.13677	0.00196	0.1684	0.00487	0.63491	0.00891	22.7184	0.34605	0.25952	0.00115	0.9573	3168.98	35.21	3243.77	7.01	2.3
9351-051.1	IP449-1	118.19	31.14	0.2722	0.00649	60	4	9.186e-05	4.881e-05	0.00159	0.00085	0.07607	0.00232	0.13257	0.00561	0.47436	0.00816	11.1816	0.21647	0.17096	0.00119	0.934	2502.67	35.8	2567.05	11.7	2.5
9351-052.1	IP449-1	157.17	71.16	0.4677	0.01186	81	4	5.838e-05	2.125e-05	0.00101	0.00037	0.13574	0.00177	0.13373	0.00422	0.4608	0.00625	10.2907	0.15268	0.16197	0.00074	0.9522	2443.07	27.62	2476.33	7.73	1.3
9351-053.1	IP449-1	177.15	84.27	0.49142	0.01118	90	8	0.00012137	3.01e-05	0.0021	0.00052	0.14097	0.00299	0.12925	0.00457	0.45057	0.00757	10.0721	0.19528	0.16213	0.00127	0.9167	2397.77	33.72	2477.98	13.23	3.2
9351-054.1	IP449-1	190.35	282.48	1.53305	0.61551	60	57	0.00138114	0.00050505	0.02394	0.00875	0.36995	0.02245	0.05965	0.02846	0.2472	0.06194	3.57928	0.98001	0.10501	0.00876	0.9532	1424.02	328.35	1714.55	161.91	16.9
9351-055.1	IP449-1	12.65	1.38	0.11234	0.00749	5	0	1e-05	1e-05	0.00017	0.00017	0.07616	0.00555	0.24868	0.02539	0.3668	0.0095	7.06566	0.26023	0.13971	0.00323	0.7816	2014.34	44.95	2223.58	40.67	9.4
9351-057.1	IP449-1	105.96	159.62	1.5563	0.03366	47	14	0.00047193	9.735e-05	0.00818	0.00169	0.46081	0.0109	0.09717	0.00388	0.32816	0.00784	5.14654	0.17893	0.11374	0.00255	0.7681	1829.48	38.18	1860.05	41.09	1.6
9351-058.1	IP449-1	264.49	283.39	1.10687	0.02256	82	18	0.00028473	4.196e-05	0.00493	0.00073	0.15882	0.0023	0.04024	0.00117	0.28046	0.00423	4.92632	0.09394	0.12739	0.00126	0.8563	1593.67	21.34	2062.33	17.61	22.7
9351-060.1	IP449-1	211.56	194.41	0.9493	0.01973	154	5	4.91e-05	1.321e-05	0.00085	0.00023	0.25747	0.00181	0.15517	0.00401	0.57211	0.00783	17.0364	0.24858	0.21597	0.00079	0.9689	2916.47	32.18	2950.9	5.89	1.2
9351-061.1	IP449-1	22.83	24.3	1.09975	0.03594	14	3	0.00031476	0.00014297	0.00546	0.00248	0.30187	0.01172	0.12896	0.00703	0.46984	0.00935	11.5586	1.50185	0.17843	0.02247	0.2743	2482.84	41.13	2638.29	226.02	5.9
9351-062.1	IP449-1	60.64	26.19	0.44619	0.01022	33	4	0.00014384	8.566e-05	0.00249	0.00148	0.1259	0.00424	0.13901	0.0065	0.49265	0.01134	11.7321	0.34206	0.17272	0.00264	0.8546	2582.14	49.14	2584.15	25.7	0.1
9351-063.1	IP449-1	141.58	88.59	0.64637	0.01568	68	10	0.0001993	6.217e-05	0.00345	0.00108	0.1869	0.00362	0.12121	0.00455	0.41917	0.00885	8.64812	0.20811	0.14963	0.00138	0.9249	2256.72	40.31	2341.74	15.86	3.6
9351-064.1	IP449-1	125.12	62.62	0.51699	0.01244	48	2	5.647e-05	6.581e-05	0.00098	0.00114	0.15944	0.00606	0.10698	0.00537	0.34688	0.00769	6.09349	0.16631	0.1274	0.00171	0.8737	1919.7	36.92	2062.45	23.8	6.9
9351-065.1	IP449-1	118.02	45.01	0.394	0.00907	64	1	1.953e-05	3.598e-05	0.00034	0.00062	0.11457	0.00241	0.14189	0.00484	0.48794	0.00676	11.7625	0.19573	0.17484	0.00134	0.8903	2561.76	29.36	2604.48	12.78	1.6
9351-066.1	IP449-1	85.42	39.44	0.47696	0.0111	33	5	0.0001916	6.294e-05	0.00332	0.00109	0.14108	0.00349	0.10585	0.004	0.35785	0.00591	5.97416	0.1365	0.12108	0.00168	0.7988	1971.96	28.13	1972.22	24.9	0
9351-067.1	IP449-1	140.22	159.52	1.17524	0.03834	59	1	2.716e-05	3.646e-05	0.00047	0.00063	0.33317	0.00356	0.09466	0.0036	0.3339	0.00548	5.42916	0.11498	0.11793	0.00136	0.8424	1857.27	26.52	1925.04	20.75	3.5
9351-068.1	IP449-1	137	80.37	0.60601	0.01257	72	3	5.966e-05	2.5e-05	0.00103	0.00043	0.17025	0.00224	0.12904	0.00359	0.45933	0.00599	10.253	0.16681	0.16189	0.00133	0.8652	2436.61	26.53	2475.51	13.94	1.6
9351-069.1	IP449-1	94.97	183.44	1.99538	0.0565	59	9	0.00025861	5.24e-05	0.00448	0.00091	0.4231	0.00419	0.09511	0.00317	0.44853	0.00647	10.8083	0.20987	0.17477	0.00198	0.8161	2388.71	28.87	2603.85	18.97	8.3
9351-070.1	IP449-1	68.84	94.61	1.4198	0.03375	30	4	0.00022163	6.752e-05	0.00384	0.00117	0.40703	0.00638	0.09586	0.00318	0.33436	0.00572	5.32586	0.12596	0.11553	0.00166	0.7987	1859.47	27.68	1888.09	26.05	1.5
9351-071.1	IP449-1	139.14	142.42	1.05738	0.02205	100	5	7.35e-05	5.533e-05	0.00127	0.00096	0.28328	0.00343	0.1496	0.00434	0.55839	0.00902	15.7242	0.30352	0.20423	0.00178	0.8936	2859.99	37.43	2860.33	14.28	0
9351-072.1	IP449-1	81.18	54.74	0.69658	0.01484	46	4	0.00011811	6.777e-05	0.00205	0.00117	0.19953	0.0041	0.13722	0.00464	0.47905	0.00779	10.9657	0.21493	0.16602	0.00151	0.8879	2523.13	34.06	2517.88	15.35	-0.2
9351-073.1	IP449-1	185	81.01	0.45236	0.00938	99	4	5.722e-05	2.139e-05	0.00099	0.00037	0.12725	0.00229	0.13509	0.00422	0.48023	0.00717	11.5107	0.22259	0.17384	0.00184	0.8399	2528.27	31.28	2594.96	17.75	2.6
9351-074.1	IP449-1	49.41	54.95	1.14886	0.02489	26	6	0.00034989	0.00010325	0.00606	0.00179	0.32315	0.01193	0.1155	0.00525	0.41061	0.00625	8.60056	0.18688	0.15191	0.00208	0.7793	2217.72	28.62	2367.57	23.61	6.3
9351-075.1	IP449-1	225.75	124.36	0.56907	0.01171	109	5	5.928e-05	2.411e-05	0.00103	0.00042	0.15438	0.00179	0.11529	0.00312	0.42495	0.00563	9.57285	0.14934	0.16338	0.0011	0.9032	2282.92	25.52	2490.95	11.41	8.4
9351-076.1	IP449-1	109.99	73.47	0.69005	0.01499	54	5	0.00012733	4.742e-05	0.00221	0.00082	0.1931	0.00345	0.11855	0.00377	0.42366	0.00629	8.68797	0.1756	0.14873	0.00178	0.8086	2277.08	28.54	2331.37	20.68	2.3
9351-077.1	IP449-1	56.28	22.48	0.41258	0.01377	30	3	0.00012168	5.36e-05	0.00211	0.00093	0.11728	0.00328	0.13665	0.00626	0.4807	0.00684	11.3097	0.20009	0.17064	0.00152	0.867	2530.29	29.85	2563.93	14.94	1.3
9351-078.1	IP449-1	86.21	60.23	0.72176	0.01616	45	1	2.843e-05	4.338e-05	0.00049	0.00075	0.20108	0.00329	0.12538	0.00411	0.45005	0.00787	9.93892	0.20341	0.16017	0.00139	0.9077	2395.47	35.1	2457.44	14.71	2.5
9351-080.1	IP449-1	81.04	130.73	1.66644	0.03897	38	0	2.098e-05	4.485e-05	0.00036	0.00078	0.48779	0.00991	0.09945	0.00336	0.33975	0.00454	5.49222	0.10115	0.11724	0.0013	0.8013	1885.44	21.89	1914.64	20.06	1.5
9351-082.1	IP449-1	41	12.51	0.3153	0.01076	28	2	0.00010037	4.58e-05	0.00174	0.00079	0.09116	0.00272	0.17219	0.00819	0.59555	0.00856	18.3167	0.3337	0.22306	0.00213	0.8544	3011.87	34.68	3002.94	15.42	-0.3
9351-083.1	IP449-1	114.11	113.14	1.02431	0.02591	73	7	0.00014421	3.815e-05	0.0025	0.00066	0.27745	0.00323	0.13716	0.00431	0.50637	0.00739	12.8845	0.23572	0.18454	0.00173	0.8615	2641.12	31.69	2694.12	15.55	2
9351-084.1	IP449-1	16.44	21.94	1.37876	0.0438	8	6	0.00111522	0.00030613	0.01933	0.00531	0.38301	0.01582	0.10253	0.00585	0.3691	0.00861	5.98304	0.32508	0.11757	0.00544	0.5357	2025.15	40.67	1919.54	85.34	-5.5
07RAT-14
9352-001.1	IP449-1	182.28	82.43	0.46716	0.0104	128	3	3.267e-05	1.591e-05	0.00057	0.00028	0.12642	0.00162	0.16218	0.00469	0.59929	0.00793	19.7015	0.30592	0.23843	0.00158	0.906	3026.98	32.06	3109.52	10.59	2.7
9352-002.1	IP449-1	161.59	84.57	0.54068	0.01193	87	4	5.924e-05	3.168e-05	0.00103	0.00055	0.15458	0.00208	0.13514	0.00402	0.47271	0.00696	10.8023	0.21775	0.16574	0.002	0.8055	2495.41	30.56	2515.07	20.38	0.8
9352-003.1	IP449-1	203.05	73.93	0.37612	0.0084	144	1	7.95e-06	1.18e-05	0.00014	0.0002	0.10135	0.00151	0.16557	0.00492	0.61445	0.00785	20.4423	0.27612	0.24129	0.00074	0.9741	3087.81	31.41	3128.5	4.91	1.3
9352-004.1	IP449-1	47.22	40.58	0.88784	0.01956	17	6	0.00044698	0.00015306	0.00775	0.00265	0.253	0.01355	0.08685	0.00525	0.30478	0.00526	4.20711	0.16794	0.10011	0.00339	0.5383	1714.99	26.03	1626.19	64.42	-5.5
9352-005.1	IP449-1	190.16	88.4	0.48024	0.0109	145	2	1.654e-05	2.431e-05	0.00029	0.00042	0.13172	0.00148	0.17475	0.00501	0.63709	0.00858	22.9925	0.34005	0.26175	0.00122	0.9497	3177.58	33.86	3257.25	7.37	2.4
9352-006.1	IP449-1	109.1	76.32	0.72265	0.01675	63	3	6.648e-05	4.851e-05	0.00115	0.00084	0.20301	0.00529	0.13596	0.00516	0.48399	0.00724	11.8509	0.22716	0.17759	0.00182	0.8476	2544.63	31.54	2630.46	17.14	3.3
9352-007.1	IP449-1	157.11	52	0.34193	0.00751	85	1	2.203e-05	1.553e-05	0.00038	0.00027	0.09465	0.00217	0.1363	0.00466	0.49237	0.00625	11.9423	0.18138	0.17591	0.00122	0.8923	2580.9	27.04	2614.72	11.55	1.3
9352-008.1	IP449-1	196.75	93.28	0.4898	0.0113	111	0	1.35e-06	4.993e-05	2e-05	0.00087	0.09931	0.00218	0.10358	0.00354	0.51088	0.00639	13.1086	0.19027	0.1861	0.00111	0.9128	2660.37	27.31	2707.97	9.89	1.8
9352-009.1	IP449-1	214.67	101.22	0.48713	0.01057	113	6	6.793e-05	2.426e-05	0.00118	0.00042	0.13428	0.00259	0.13036	0.00459	0.47291	0.00939	10.6766	0.28979	0.16374	0.00265	0.8063	2496.32	41.24	2494.64	27.52	-0.1
9352-010.1	IP449-1	42.33	42.17	1.02912	0.02366	15	2	0.00022507	0.00015954	0.0039	0.00277	0.29007	0.00949	0.08429	0.00366	0.29905	0.00511	4.30444	0.14647	0.10439	0.00286	0.6023	1686.6	25.39	1703.64	51.28	1
9352-011.1	IP449-1	181.06	79.56	0.45394	0.00945	95	1	8.31e-06	2.985e-05	0.00014	0.00052	0.1248	0.00266	0.13008	0.0048	0.47316	0.01026	10.6609	0.24686	0.16341	0.00096	0.9681	2497.41	45.06	2491.28	9.88	-0.2
9352-012.1	IP449-1	85.36	62.27	0.75361	0.01862	47	3	0.00010239	6.921e-05	0.00177	0.0012	0.20634	0.00465	0.12756	0.00461	0.46591	0.00634	10.5071	0.20838	0.16356	0.0021	0.767	2465.61	27.94	2492.79	21.77	1.1
9352-013.1	IP449-1	235.27	194.28	0.85308	0.01794	122	5	5.866e-05	3.76e-05	0.00102	0.00065	0.23966	0.00266	0.12211	0.00337	0.43465	0.00606	9.0454	0.15938	0.15093	0.00138	0.8567	2326.63	27.3	2356.55	15.73	1.3
9352-014.1	IP449-1	253.61	53.49	0.21789	0.00479	188	3	2.449e-05	1.456e-05	0.00042	0.00025	0.05853	0.00209	0.17398	0.00954	0.64771	0.02285	24.164	1.28744	0.27058	0.00968	0.7459	3219.24	90.01	3309.37	57.23	2.7
9352-015.1	IP449-1	124.7	76.95	0.63746	0.01366	67	4	8.27e-05	3.337e-05	0.00143	0.00058	0.1768	0.00546	0.12922	0.00518	0.46589	0.00644	10.6545	0.17582	0.16586	0.00124	0.894	2465.51	28.38	2516.32	12.58	2
9352-016.1	IP449-1	194.93	90.09	0.47743	0.011	88	5	6.956e-05	2.482e-05	0.00121	0.00043	0.13739	0.00196	0.11825	0.00362	0.41092	0.00587	8.10365	0.24253	0.14303	0.00352	0.5796	2219.14	26.86	2264.18	43.03	2
9352-017.1	IP449-1	30.78	42.73	1.43391	0.03205	29	1	7.563e-05	9.552e-05	0.00131	0.00166	0.39762	0.00681	0.18088	0.0059	0.65227	0.01077	25.361	0.50452	0.28199	0.0026	0.8879	3237.06	42.16	3374	14.46	4.1
9352-019.1	IP449-1	158.36	90.49	0.5903	0.01222	86	4	6.762e-05	2.609e-05	0.00117	0.00045	0.16367	0.00222	0.13089	0.0037	0.47207	0.00646	10.7802	0.17159	0.16562	0.00109	0.9119	2492.64	28.37	2513.88	11.11	0.8
9352-021.1	IP449-1	202.95	123.75	0.6299	0.01304	106	3	4.208e-05	1.434e-05	0.00073	0.00025	0.16832	0.00215	0.12152	0.00336	0.45475	0.00597	10.0164	0.20398	0.15975	0.00224	0.7311	2416.34	26.53	2453	23.88	1.5
9352-022.1	IP449-1	167.32	272.54	1.68272	0.03501	103	4	6.243e-05	2.392e-05	0.00108	0.00041	0.47644	0.00351	0.12374	0.00317	0.43704	0.00568	9.28046	0.16231	0.15401	0.00157	0.8163	2337.39	25.55	2390.92	17.43	2.2
9352-023.1	IP449-1	185.1	112.84	0.62977	0.01322	100	4	5.731e-05	2.4e-05	0.00099	0.00042	0.17955	0.00371	0.13258	0.00425	0.46502	0.00588	10.5921	0.14771	0.1652	0.00075	0.9471	2461.68	25.92	2509.6	7.6	1.9
9352-026.1	IP449-1	146.92	67.07	0.47162	0.01038	110	8	9.888e-05	3.034e-05	0.00171	0.00053	0.12669	0.00394	0.17154	0.00693	0.63857	0.0085	21.1077	1.9523	0.23974	0.02155	0.2655	3183.38	33.55	3118.22	150.85	-2.1
9352-028.1	IP449-1	213.73	175.21	0.84689	0.01778	136	4	3.688e-05	1.374e-05	0.00064	0.00024	0.23644	0.00205	0.14525	0.00377	0.52026	0.00654	13.3787	0.18084	0.18651	0.00068	0.964	2700.27	27.81	2711.61	5.99	0.4
9352-029.1	IP449-1	326.97	117.12	0.37006	0.00803	151	3	2.309e-05	1.273e-05	0.0004	0.00022	0.10539	0.00123	0.12176	0.00342	0.42754	0.00572	8.73868	0.19297	0.14824	0.00237	0.6964	2294.62	25.89	2325.73	27.63	1.3
9352-030.1	IP449-1	168.36	109.4	0.67129	0.01406	81	4	7.331e-05	2.301e-05	0.00127	0.0004	0.17548	0.00205	0.11083	0.00303	0.42396	0.00558	8.60881	0.12602	0.14727	0.00073	0.9415	2278.43	25.31	2314.48	8.56	1.6
9352-031.1	IP449-1	250.32	73.03	0.30139	0.00659	111	3	3.024e-05	1.595e-05	0.00052	0.00028	0.05221	0.00107	0.07379	0.00241	0.42593	0.00562	9.01428	0.12895	0.15349	0.00063	0.9583	2287.35	25.45	2385.21	7.04	4.1
9352-032.1	IP449-1	44.87	50.8	1.16956	0.02691	17	2	0.00019734	0.00013073	0.00342	0.00227	0.33378	0.0152	0.08623	0.00459	0.30213	0.00455	4.40273	0.15702	0.10569	0.00322	0.5295	1701.87	22.58	1726.3	57.06	1.4
9352-032.2	IP449-1	35.82	46.45	1.33957	0.03482	13	4	0.00043147	0.00025135	0.00748	0.00436	0.3891	0.01238	0.08342	0.00369	0.28718	0.0047	4.24273	0.20172	0.10715	0.00457	0.4565	1627.43	23.6	1751.48	80.15	7.1
9352-032.2.2	IP449-1	34.51	43.6	1.30528	0.0398	13	4	0.00048787	0.00018687	0.00846	0.00324	0.36954	0.01703	0.08539	0.00512	0.30161	0.00701	4.30618	0.18186	0.10355	0.00336	0.6463	1699.28	34.8	1688.7	61.15	-0.6
9352-032.3	IP449-1	49.41	59.27	1.23922	0.02712	19	5	0.00038077	0.00010649	0.0066	0.00185	0.34921	0.00724	0.08449	0.00307	0.29983	0.00609	4.28917	0.12838	0.10375	0.00203	0.7605	1690.46	30.28	1692.31	36.57	0.1
9352-032.3.2	IP449-1	42.91	48.6	1.17005	0.02556	16	1	7.436e-05	9.231e-05	0.00129	0.0016	0.3555	0.00977	0.09024	0.00377	0.297	0.00671	4.47224	0.17753	0.10921	0.00327	0.6633	1676.41	33.43	1786.3	55.59	6.2
9352-033.1	IP449-1	186.29	96.93	0.53753	0.01211	97	3	4.207e-05	2.965e-05	0.00073	0.00051	0.15202	0.00206	0.12973	0.00384	0.4587	0.00621	10.2132	0.16444	0.16148	0.00116	0.8972	2433.81	27.52	2471.27	12.15	1.5
9352-034.1	IP449-1	183.42	311.75	1.75587	0.0374	75	8	0.00017607	7.126e-05	0.00305	0.00123	0.46938	0.00801	0.07804	0.00253	0.29194	0.00513	6.15533	0.13778	0.15292	0.00181	0.8515	1651.22	25.66	2378.81	20.3	30.6
9352-035.1	IP449-1	91.79	39.2	0.44116	0.00943	49	4	9.483e-05	3.913e-05	0.00164	0.00068	0.12386	0.00236	0.13463	0.00426	0.4795	0.00643	11.3435	0.1748	0.17157	0.00105	0.9196	2525.11	28.07	2573.07	10.24	1.9
9352-036.1	IP449-1	158.64	202.75	1.32032	0.02717	111	4	6.255e-05	3.003e-05	0.00108	0.00052	0.36694	0.00302	0.14485	0.00376	0.52118	0.00706	13.5503	0.2095	0.18856	0.00112	0.9241	2704.19	29.98	2729.68	9.84	0.9
9352-037.1	IP449-1	168.36	82.63	0.50701	0.0108	130	2	2.494e-05	2.499e-05	0.00043	0.00043	0.13562	0.00156	0.17238	0.00474	0.64446	0.0084	23.0353	0.33192	0.25924	0.00122	0.9458	3206.53	33.03	3242.07	7.45	1.1
9352-038.1	IP449-1	124.32	94.7	0.78695	0.0194	68	1	1.025e-05	2.722e-05	0.00018	0.00047	0.21963	0.00293	0.12877	0.00407	0.46138	0.00671	10.4722	0.17875	0.16462	0.0012	0.9056	2445.67	29.67	2503.64	12.33	2.3
9352-039.1	IP449-1	262.33	151.63	0.59712	0.01254	110	2	2.509e-05	1.735e-05	0.00043	0.0003	0.17373	0.002	0.10949	0.00296	0.37633	0.00471	6.55313	0.09246	0.12629	0.00065	0.9331	2059.12	22.12	2046.99	9.07	-0.6
9352-040.1	IP449-1	111.33	87.61	0.81301	0.01737	79	7	0.00012538	3.837e-05	0.00217	0.00066	0.21893	0.00418	0.15434	0.00493	0.57316	0.00806	17.2283	0.27288	0.218	0.00125	0.9333	2920.79	33.12	2966	9.27	1.5
9352-041.1	IP449-1	148.15	135.55	0.9452	0.01945	77	4	7.742e-05	3.483e-05	0.00134	0.0006	0.26749	0.00305	0.12101	0.00334	0.42761	0.00616	8.7324	0.15105	0.14811	0.00118	0.8901	2294.94	27.87	2324.22	13.68	1.3
9352-042.1	IP449-1	214.02	122.92	0.59335	0.01245	121	2	2.562e-05	3.041e-05	0.00044	0.00053	0.16412	0.00314	0.13558	0.00435	0.49018	0.00736	11.8643	0.19948	0.17554	0.00104	0.9373	2571.46	31.93	2611.21	9.87	1.5
9352-043.1	IP449-1	147.32	26.74	0.18751	0.00455	84	2	3.565e-05	2.905e-05	0.00062	0.0005	0.05143	0.00143	0.14509	0.00575	0.52895	0.00772	14.8781	1.40808	0.204	0.01871	0.2754	2737.02	32.64	2858.48	157.64	4.2
9352-044.1	IP449-1	52.68	63.63	1.24778	0.02746	19	4	0.00032171	0.00011087	0.00558	0.00192	0.35679	0.00766	0.08157	0.00282	0.28527	0.00452	4.17178	0.12705	0.10606	0.00256	0.6194	1617.87	22.72	1732.78	44.88	6.6
9352-044.1	IP449-1	52.22	63	1.2463	0.02779	20	4	0.00027868	9.992e-05	0.00483	0.00173	0.3615	0.00676	0.0879	0.00287	0.30305	0.00446	4.46646	0.11905	0.10689	0.00219	0.648	1706.42	22.1	1747.09	37.95	2.3
9352-044.1.2	IP449-1	47.6	58.21	1.26335	0.03512	18	2	0.00016011	0.00020242	0.00277	0.00351	0.38254	0.01086	0.08715	0.00391	0.28783	0.006	4.19959	0.17151	0.10582	0.00345	0.6106	1630.67	30.13	1728.62	61.07	5.7
9352-044.2	IP449-1	75.12	124.97	1.71866	0.03908	32	4	0.00021048	9.929e-05	0.00365	0.00172	0.51353	0.00755	0.09198	0.00286	0.30783	0.00468	4.44136	0.11205	0.10464	0.00192	0.6937	1730.02	23.12	1708.02	34.09	-1.3
9352-044.2.1	IP449-1	67.65	107.02	1.63437	0.03478	28	3	0.00015832	7.859e-05	0.00274	0.00136	0.48131	0.0082	0.0885	0.00288	0.30051	0.00535	4.37322	0.11497	0.10555	0.00182	0.7586	1693.82	26.55	1723.86	32.05	1.7
9352-045.1	IP449-1	132.36	58.44	0.45611	0.01	71	6	0.00011371	8.221e-05	0.00197	0.00142	0.12398	0.00364	0.1307	0.00517	0.48087	0.00717	11.4057	0.20819	0.17203	0.00152	0.8777	2531.04	31.31	2577.46	14.8	1.8
9352-046.1	IP449-1	145.36	45.88	0.32607	0.01258	73	3	5.052e-05	2.677e-05	0.00088	0.00046	0.09125	0.00169	0.13045	0.00585	0.46616	0.00627	10.5392	0.16008	0.16397	0.00092	0.931	2466.72	27.61	2497.02	9.44	1.2
9352-047.1	IP449-1	140.93	76.87	0.56347	0.01326	75	2	3.767e-05	3.256e-05	0.00065	0.00056	0.15728	0.00391	0.12984	0.00482	0.46515	0.00668	10.4976	0.19285	0.16368	0.0016	0.8484	2462.26	29.46	2494.02	16.61	1.3
9352-049.1	IP449-1	115.22	83.58	0.74931	0.01665	47	5	0.00013292	4.847e-05	0.0023	0.00084	0.20742	0.00329	0.09776	0.00296	0.35316	0.0046	5.88517	0.098	0.12086	0.00107	0.8487	1949.68	21.95	1968.96	15.91	1
9352-050.1	IP449-1	152.39	58.81	0.39864	0.00882	82	7	0.00011054	3.628e-05	0.00192	0.00063	0.11001	0.00209	0.13375	0.00428	0.48468	0.00637	11.6241	0.17181	0.17394	0.00093	0.9338	2547.64	27.71	2595.91	8.91	1.9
9352-052.1	IP449-1	155.97	182.95	1.21176	0.02565	87	2	2.705e-05	2.764e-05	0.00047	0.00048	0.3346	0.00826	0.12063	0.00426	0.43688	0.00598	9.27856	0.14128	0.15404	0.00079	0.942	2336.64	26.91	2391.22	8.79	2.3
9352-053.1	IP449-1	33.26	17.77	0.55191	0.01497	20	5	0.00034607	0.00016375	0.006	0.00284	0.14421	0.00837	0.13552	0.00894	0.51866	0.00806	13.3382	0.31977	0.18652	0.00306	0.7341	2693.48	34.32	2711.68	27.32	0.7
9352-054.1	IP449-1	285.87	111.96	0.4046	0.01592	196	10	6.981e-05	1.727e-05	0.00121	0.0003	0.09362	0.00189	0.13731	0.00652	0.59343	0.01036	20.2035	0.48049	0.24692	0.00348	0.8083	3003.3	42.05	3165.13	22.56	5.1
9352-055.1	IP449-1	151.34	46.14	0.31497	0.00728	60	3	5.972e-05	3.146e-05	0.00104	0.00055	0.0928	0.00199	0.11074	0.00381	0.37587	0.00511	6.687	0.10842	0.12903	0.00094	0.8954	2056.95	24.01	2084.82	12.86	1.3
9352-058.1	IP449-1	54.38	0.41	0.00785	0.00072	17	1	7.976e-05	0.00028304	0.00138	0.00491	0.00703	0.01054	0.28619	0.42998	0.31985	0.00655	5.16421	0.2473	0.1171	0.00478	0.534	1789.01	32.06	1912.4	75.11	6.5
9352-059.1	IP449-1	158.26	115.1	0.75132	0.01631	61	4	8.624e-05	4.331e-05	0.00149	0.00075	0.22148	0.00314	0.09902	0.00294	0.33591	0.00485	5.32278	0.09968	0.11492	0.00118	0.8389	1866.97	23.43	1878.7	18.63	0.6
9352-060.1	IP449-1	135.52	58.71	0.44751	0.00939	70	2	3.145e-05	1.838e-05	0.00055	0.00032	0.12962	0.00284	0.13383	0.00448	0.46205	0.00657	10.514	0.19306	0.16504	0.00165	0.8423	2448.61	29.03	2507.92	16.88	2.4
9352-061.1	IP449-1	116.24	75.54	0.67136	0.01575	79	5	8.269e-05	3.69e-05	0.00143	0.00064	0.18258	0.00249	0.15464	0.00467	0.5686	0.00757	16.4761	0.25011	0.21016	0.00123	0.9246	2902.07	31.17	2906.77	9.48	0.2
9352-062.1	IP449-1	131.46	54.08	0.42499	0.00913	71	1	1.393e-05	4.212e-05	0.00024	0.00073	0.11704	0.00242	0.13456	0.0044	0.48863	0.00659	11.6719	0.1845	0.17324	0.00117	0.9063	2564.75	28.6	2589.24	11.28	0.9
9352-063.1	IP449-1	63.42	81.52	1.32793	0.02841	38	6	0.00022958	7.688e-05	0.00398	0.00133	0.37404	0.00542	0.12901	0.00399	0.45801	0.00777	10.0713	0.22801	0.15948	0.00208	0.8215	2430.76	34.46	2450.17	22.18	0.8
9352-064.1	IP449-1	183.72	81.41	0.45774	0.0106	100	2	3.069e-05	1.607e-05	0.00053	0.00028	0.12812	0.00162	0.13581	0.00413	0.4852	0.00736	11.7254	0.2094	0.17527	0.00135	0.9037	2549.85	32.04	2608.63	12.89	2.3
9352-066.1	IP449-1	119.52	52.58	0.45444	0.0106	62	5	9.958e-05	4.289e-05	0.00173	0.00074	0.12731	0.00378	0.13166	0.00531	0.46996	0.00663	10.5117	0.17867	0.16222	0.00128	0.8879	2483.39	29.14	2478.96	13.36	-0.2
9352-067.1	IP449-1	144.01	53.83	0.38614	0.00819	73	3	5.843e-05	3.471e-05	0.00101	0.0006	0.10928	0.00288	0.13148	0.00483	0.46458	0.00661	10.5199	0.17695	0.16423	0.00121	0.9006	2459.73	29.16	2499.69	12.46	1.6
9352-068.1	IP449-1	88.1	45.74	0.53641	0.01505	45	6	0.00016673	4.983e-05	0.00289	0.00086	0.14944	0.00288	0.12647	0.00465	0.45396	0.00631	10.0704	0.19172	0.16089	0.00183	0.8051	2412.85	28.05	2465.01	19.35	2.1
9352-069.1	IP449-1	190.68	165.7	0.89774	0.04174	120	2	2.485e-05	1.601e-05	0.00043	0.00028	0.24864	0.01581	0.13985	0.01419	0.50495	0.03229	13.6247	1.61947	0.19569	0.01811	0.6353	2635.03	139.82	2790.62	160.14	5.6
9352-070.1	IP449-1	89.04	42.09	0.48832	0.01049	84	6	0.00010897	2.986e-05	0.00189	0.00052	0.1271	0.00195	0.19415	0.00585	0.74595	0.01088	34.8278	0.55108	0.33862	0.00155	0.9582	3592.57	40.31	3656.57	6.99	1.8
9352-071.1	IP449-1	93.79	63.49	0.69928	0.01607	48	2	5.591e-05	3.691e-05	0.00097	0.00064	0.19989	0.00287	0.12457	0.0038	0.43579	0.0061	9.17201	0.14878	0.15265	0.00101	0.9144	2331.77	27.46	2375.78	11.33	1.9
9352-072.1	IP449-1	113.21	84.42	0.77031	0.01672	46	7	0.00019537	4.879e-05	0.00339	0.00085	0.23002	0.00386	0.10511	0.00333	0.352	0.00555	5.94396	0.13046	0.12247	0.00165	0.7943	1944.15	26.5	1992.51	24.09	2.4
9352-073.1	IP449-1	196.05	102.89	0.54215	0.01179	77	3	4.243e-05	2.499e-05	0.00074	0.00043	0.1566	0.00423	0.10317	0.00388	0.35718	0.00516	6.01369	0.09935	0.12211	0.00078	0.9227	1968.81	24.55	1987.27	11.46	0.9
9352-074.1	IP449-1	72.45	43.64	0.62219	0.01435	44	6	0.00019626	0.00011121	0.0034	0.00193	0.17339	0.00492	0.14546	0.00591	0.52197	0.00923	13.5982	0.29985	0.18894	0.0021	0.8653	2707.54	39.23	2732.99	18.45	0.9
9352-077.1	IP449-1	143.08	93	0.6715	0.014	76	1	2.398e-05	4.421e-05	0.00042	0.00077	0.18756	0.00281	0.12718	0.00371	0.45532	0.00633	10.0923	0.17097	0.16076	0.0013	0.8809	2418.87	28.12	2463.64	13.72	1.8
9352-078.1	IP449-1	124.46	76.51	0.63505	0.01333	68	1	1.715e-05	2.608e-05	0.0003	0.00045	0.17751	0.00249	0.13241	0.00389	0.47371	0.00715	10.9004	0.20035	0.16689	0.00147	0.8804	2499.82	31.33	2526.67	14.83	1.1
9352-079.1	IP449-1	101.59	63.33	0.64403	0.0137	49	3	7.439e-05	7.742e-05	0.00129	0.00134	0.18093	0.004	0.11865	0.00413	0.42236	0.00695	8.6573	0.27449	0.14866	0.00374	0.6179	2271.18	31.56	2330.59	43.69	2.5
9352-080.1	IP449-1	120.54	107.31	0.91969	0.01947	64	0	5.69e-06	6.101e-05	0.0001	0.00106	0.26058	0.00447	0.12429	0.00379	0.43868	0.00599	9.15469	0.15857	0.15135	0.00138	0.8538	2344.73	26.89	2361.28	15.6	0.7
9352-081.1	IP449-1	185.71	219.58	1.2215	0.02567	107	2	2.683e-05	1.959e-05	0.00047	0.00034	0.34477	0.00415	0.12544	0.00349	0.44442	0.0061	9.46624	0.15208	0.15448	0.00105	0.9072	2370.42	27.28	2396.14	11.63	1.1
9352-082.1	IP449-1	150.35	75.2	0.51672	0.01109	88	4	6.665e-05	2.536e-05	0.00116	0.00044	0.14574	0.00198	0.14411	0.00412	0.51093	0.00671	13.0704	0.18976	0.18554	0.00088	0.9461	2660.6	28.71	2702.99	7.85	1.6
07RAT-20
9353-001.1	IP449-1	95.99	68.53	0.73748	0.01564	47	4	0.00012758	4.151e-05	0.00221	0.00072	0.20801	0.00572	0.11792	0.00464	0.41808	0.00775	8.60685	0.21777	0.14931	0.00225	0.8068	2251.76	35.31	2338.02	26.02	3.7
9353-004.1	IP449-1	79.61	35.06	0.45499	0.00988	30	2	8.734e-05	0.00038102	0.00151	0.0066	0.12828	0.01445	0.09832	0.0114	0.34873	0.00587	5.96408	0.32222	0.12404	0.00611	0.4258	1928.53	28.14	2015.1	90.07	4.3
9353-005.1	IP449-1	142.72	44.45	0.32173	0.00889	68	6	0.00010251	3.869e-05	0.00178	0.00067	0.08766	0.00223	0.12041	0.00497	0.44195	0.00758	9.84376	0.21406	0.16154	0.00184	0.8546	2359.35	34	2471.88	19.34	4.6
9353-006.1	IP449-1	200.56	105.58	0.54384	0.01187	110	8	9.782e-05	3.612e-05	0.0017	0.00063	0.1527	0.00231	0.13413	0.004	0.47768	0.00652	11.6459	0.22222	0.17682	0.00207	0.7925	2517.16	28.52	2623.28	19.64	4
9353-007.1	IP449-1	296.02	205.26	0.71631	0.01472	151	7	6.29e-05	1.858e-05	0.00109	0.00032	0.20429	0.00251	0.12476	0.00338	0.43746	0.00551	8.91898	0.12388	0.14787	0.00066	0.947	2339.25	24.75	2321.43	7.73	-0.8
9353-008.1	IP449-1	42.34	57.88	1.41239	0.0312	19	1	8.92e-05	0.00013889	0.00155	0.00241	0.41737	0.02214	0.09931	0.00594	0.33605	0.0056	5.41752	0.15444	0.11692	0.00247	0.6773	1867.65	27.08	1909.68	38.45	2.2
9353-009.1	IP449-1	106.79	117.74	1.13902	0.02534	59	5	0.0001191	6.633e-05	0.00206	0.00115	0.32356	0.00421	0.12406	0.00363	0.43673	0.00603	9.20848	0.18211	0.15293	0.00192	0.7775	2335.96	27.12	2378.89	21.52	1.8
9353-010.1	IP449-1	180.23	120.96	0.6933	0.01546	66	4	8.149e-05	3.858e-05	0.00141	0.00067	0.20119	0.00262	0.09352	0.00273	0.32226	0.00441	4.97433	0.08384	0.11195	0.00092	0.8739	1800.77	21.56	1831.31	15.04	1.7
9353-011.1	IP449-1	121.55	88.71	0.75397	0.01879	60	6	0.00013256	5.431e-05	0.0023	0.00094	0.2167	0.00673	0.12088	0.00514	0.42058	0.00626	8.71313	0.16612	0.15025	0.00153	0.8478	2263.12	28.48	2348.81	17.53	3.6
9353-013.1	IP449-1	146.18	66.22	0.46793	0.01018	56	4	8.034e-05	3.76e-05	0.00139	0.00065	0.13767	0.00287	0.10419	0.00342	0.35413	0.0046	6.00864	0.19839	0.12306	0.00354	0.5025	1954.3	21.94	2001.03	52.01	2.3
9353-015.1	IP449-1	141.26	152.89	1.11813	0.023	56	4	0.00010848	5.117e-05	0.00188	0.00089	0.34053	0.00469	0.0963	0.00276	0.31619	0.00455	4.87423	0.09486	0.1118	0.00128	0.8133	1771.11	22.34	1828.93	20.84	3.2
9353-016.1	IP449-1	120.54	53.87	0.46168	0.01297	63	2	4.018e-05	2.496e-05	0.0007	0.00043	0.12953	0.00451	0.1316	0.00623	0.46905	0.00727	10.7396	0.21742	0.16606	0.00186	0.8352	2479.39	31.99	2518.33	18.98	1.5
9353-017.1	IP449-1	62.05	74.95	1.24785	0.02748	41	3	0.00012054	6.203e-05	0.00209	0.00107	0.34997	0.00461	0.1397	0.00435	0.49811	0.00878	12.3598	0.25202	0.17996	0.00149	0.915	2605.67	37.88	2652.53	13.81	1.8
9353-020.1	IP449-1	208.2	68.4	0.33938	0.00706	77	5	7.135e-05	2.544e-05	0.00124	0.00044	0.09875	0.00163	0.10273	0.00307	0.35304	0.00486	5.93391	0.11119	0.1219	0.00135	0.8091	1949.09	23.21	1984.28	19.89	1.8
9353-021.1	IP449-1	88.2	128.58	1.506	0.03466	39	5	0.00020923	5.851e-05	0.00363	0.00101	0.4241	0.00654	0.09496	0.00297	0.33722	0.0049	5.35209	0.14029	0.11511	0.00231	0.6503	1873.26	23.67	1881.61	36.6	0.4
9353-022.1	IP449-1	42.69	138.3	3.3465	0.07225	27	8	0.00061625	0.00015587	0.01068	0.0027	0.95544	0.01837	0.10137	0.0033	0.35506	0.00529	5.90993	0.18629	0.12072	0.00314	0.5754	1958.72	25.2	1966.88	47.08	0.4
9353-023.1	IP449-1	260.6	107.66	0.4268	0.00883	133	8	7.635e-05	3.247e-05	0.00132	0.00056	0.1201	0.00178	0.12996	0.00373	0.46185	0.00612	10.418	0.16196	0.1636	0.00108	0.9063	2447.73	27.07	2493.2	11.2	1.8
9353-024.1	IP449-1	213.88	56.12	0.27107	0.00602	109	5	5.765e-05	2.573e-05	0.001	0.00045	0.07577	0.0014	0.13223	0.00419	0.47307	0.00618	11.1776	0.1637	0.17137	0.00089	0.9366	2496.99	27.12	2571.03	8.67	2.9
9353-025.1	IP449-1	151.32	66.08	0.45111	0.01081	69	3	5.29e-05	3.874e-05	0.00092	0.00067	0.12596	0.00223	0.11684	0.00381	0.41845	0.00555	8.50115	0.13485	0.14734	0.00106	0.8927	2253.45	25.27	2315.32	12.41	2.7
9353-026.1	IP449-1	114.65	84.62	0.76243	0.01637	54	9	0.00022023	0.00011139	0.00382	0.00193	0.21708	0.00487	0.11167	0.00377	0.3922	0.00516	10.0404	0.19164	0.18567	0.00228	0.7699	2133.04	23.94	2704.17	20.41	21.1
9353-027.1	IP449-1	114.05	65.72	0.59532	0.01331	60	7	0.00016565	4.077e-05	0.00287	0.00071	0.16371	0.00567	0.1264	0.00549	0.45966	0.00625	10.328	0.18856	0.16296	0.00173	0.8175	2438.05	27.67	2486.61	17.98	2
9353-028.1	IP449-1	143.83	78.72	0.56542	0.01291	53	5	0.00011775	6.654e-05	0.00204	0.00115	0.16474	0.00352	0.09745	0.00332	0.33448	0.00451	5.3816	0.09984	0.11669	0.0013	0.8024	1860.07	21.83	1906.14	20.18	2.4
9353-029.1	IP449-1	194.34	169.56	0.90132	0.01899	100	5	6.432e-05	3.279e-05	0.00111	0.00057	0.25521	0.00302	0.12074	0.00337	0.42643	0.00592	8.7441	0.13911	0.14872	0.00093	0.9214	2289.63	26.81	2331.23	10.71	1.8
9353-031.1	IP449-1	108.93	69.97	0.66358	0.01526	69	4	8.916e-05	5.594e-05	0.00155	0.00097	0.18434	0.00297	0.14795	0.00467	0.53258	0.00767	14.4958	0.25948	0.19741	0.00177	0.8672	2752.3	32.34	2804.86	14.77	1.9
9353-032.1	IP449-1	95.12	68.97	0.7491	0.0282	48	3	9.296e-05	0.00010888	0.00161	0.00189	0.1738	0.00483	0.10116	0.00501	0.436	0.00705	9.75046	0.23744	0.16219	0.00264	0.748	2332.71	31.74	2478.67	27.74	5.9
9353-033.1	IP449-1	155.79	88.92	0.58966	0.01229	62	1	2.352e-05	3.025e-05	0.00041	0.00052	0.17469	0.00226	0.10528	0.00292	0.35537	0.00458	6.04999	0.09067	0.12347	0.00076	0.9121	1960.18	21.83	2007.02	11.03	2.3
9353-034.1	IP449-1	135	107.28	0.82093	0.01729	52	3	7.181e-05	4.669e-05	0.00124	0.00081	0.23962	0.00332	0.09669	0.0028	0.33127	0.0047	5.29943	0.09645	0.11602	0.00113	0.8463	1844.52	22.79	1895.85	17.68	2.7
9353-036.1	IP449-1	189.22	295.19	1.61165	0.03287	84	11	0.00021305	0.00010306	0.00369	0.00179	0.48647	0.00526	0.09653	0.00262	0.3198	0.00456	5.14777	0.11491	0.11675	0.00181	0.7249	1788.74	22.29	1906.99	28.1	6.2
9353-037.1	IP449-1	101.92	60	0.60819	0.01288	38	1	2.707e-05	7.216e-05	0.00047	0.00125	0.17024	0.00406	0.09351	0.00335	0.33407	0.00542	5.31173	0.12253	0.11532	0.00167	0.7823	1858.1	26.26	1884.84	26.31	1.4
9353-038.1	IP449-1	168.98	94.53	0.57795	0.01195	82	4	6.233e-05	4.194e-05	0.00108	0.00073	0.14378	0.0022	0.10768	0.0031	0.43282	0.00563	9.31477	0.13856	0.15608	0.0009	0.9225	2318.44	25.36	2413.67	9.86	3.9
9353-039.1	IP449-1	121.17	70.73	0.60297	0.01262	49	3	7.744e-05	5.626e-05	0.00134	0.00098	0.17641	0.00318	0.10489	0.00323	0.35852	0.00489	6.0075	0.12517	0.12153	0.00172	0.7396	1975.14	23.25	1978.81	25.39	0.2
9353-040.1	IP449-1	139.98	48.44	0.35748	0.00756	74	6	0.00010635	3.237e-05	0.00184	0.00056	0.09688	0.00187	0.13108	0.00415	0.48369	0.00655	11.7564	0.18789	0.17628	0.00122	0.9023	2543.3	28.54	2618.21	11.6	2.9
9353-042.1	IP449-1	165.94	210.92	1.31308	0.02698	95	4	5.864e-05	6.527e-05	0.00102	0.00113	0.37756	0.00686	0.12502	0.00385	0.43479	0.00609	9.12724	0.16619	0.15225	0.00152	0.8385	2327.26	27.44	2371.37	17.16	1.9
9353-043.1	IP449-1	97.22	106.97	1.13674	0.02447	39	4	0.00015779	0.00039053	0.00273	0.00677	0.33481	0.01667	0.09419	0.00534	0.31978	0.00527	4.90249	0.29442	0.11119	0.0062	0.3906	1788.66	25.81	1818.95	104.74	1.7
9353-046.1	IP449-1	221.36	69.14	0.32264	0.00672	91	3	3.69e-05	2.184e-05	0.00064	0.00038	0.09231	0.00146	0.11161	0.00324	0.39011	0.00494	7.26859	0.10229	0.13513	0.00065	0.9415	2123.36	22.93	2165.71	8.36	2
9353-047.1	IP449-1	192	86.92	0.46767	0.01138	92	4	4.988e-05	3.725e-05	0.00086	0.00065	0.12656	0.00265	0.11715	0.00413	0.43291	0.0063	9.15017	0.16221	0.1533	0.0013	0.8802	2318.82	28.39	2383.02	14.52	2.7
9353-048.1	IP449-1	54.06	51.36	0.98159	0.0272	25	3	0.00019802	0.00012503	0.00343	0.00217	0.27873	0.00648	0.10783	0.00445	0.37974	0.00758	6.69763	0.19094	0.12792	0.0023	0.779	2075.08	35.5	2069.56	32.1	-0.3
9353-049.1	IP449-1	54.8	32.58	0.61418	0.01727	28	6	0.00026736	8.731e-05	0.00463	0.00151	0.16663	0.0045	0.12245	0.00523	0.45135	0.00786	9.79197	0.21776	0.15734	0.00186	0.8493	2401.26	34.99	2427.33	20.2	1.1
9353-051.1	IP449-1	214.42	203.18	0.97892	0.02056	133	3	3.196e-05	2.569e-05	0.00055	0.00045	0.27168	0.00316	0.13704	0.00371	0.49377	0.00621	12.5197	0.17277	0.18389	0.00079	0.9507	2586.97	26.86	2688.3	7.15	3.8
9353-055.1	IP449-1	121.74	61.08	0.51832	0.01111	63	5	0.00011192	3.665e-05	0.00194	0.00064	0.14502	0.00405	0.12874	0.00482	0.46011	0.00589	10.3856	0.15248	0.16371	0.00095	0.9207	2440.04	26.05	2494.32	9.76	2.2
9353-056.1	IP449-1	124.4	93.65	0.77774	0.01654	76	5	8.882e-05	4.191e-05	0.00154	0.00073	0.21354	0.00285	0.13855	0.00396	0.50461	0.0069	13.2189	0.21223	0.18999	0.00131	0.9052	2633.57	29.63	2742.11	11.35	4
9353-058.1	IP449-1	61.51	67.63	1.13587	0.02427	27	1	3.688e-05	7.666e-05	0.00064	0.00133	0.34227	0.00554	0.10374	0.00314	0.34429	0.00485	5.58409	0.11423	0.11763	0.00155	0.7687	1907.26	23.28	1920.58	23.84	0.7
9353-059.1	IP449-1	139.84	48.63	0.35927	0.00791	69	1	2.145e-05	3.805e-05	0.00037	0.00066	0.10395	0.00213	0.13067	0.00435	0.4516	0.00644	10.1505	0.16542	0.16302	0.00103	0.9238	2402.36	28.68	2487.2	10.64	3.4
9353-060.1	IP449-1	149.28	72.1	0.49898	0.01146	78	3	5.241e-05	2.402e-05	0.00091	0.00042	0.14273	0.0021	0.13235	0.00404	0.4627	0.00636	10.3577	0.17415	0.16235	0.00132	0.8779	2451.48	28.09	2480.31	13.75	1.2
9353-062.1	IP449-1	133.66	133.87	1.03471	0.0216	89	2	2.946e-05	3.444e-05	0.00051	0.0006	0.28968	0.00289	0.14643	0.00396	0.52303	0.00729	13.5885	0.23539	0.18843	0.00164	0.8673	2712.04	30.93	2728.47	14.38	0.6
9353-065.1	IP449-1	79.5	34.51	0.44838	0.01031	38	3	0.00010948	5.22e-05	0.0019	0.0009	0.13443	0.00296	0.13024	0.00454	0.4344	0.00613	9.09002	0.21474	0.15177	0.00262	0.689	2325.52	27.63	2365.92	29.75	1.7
9353-066.1	IP449-1	89.77	88.19	1.01487	0.0251	47	0	4.44e-06	3.807e-05	8e-05	0.00066	0.28914	0.0042	0.12127	0.00402	0.42565	0.00705	8.78448	0.19855	0.14968	0.00201	0.807	2286.06	31.95	2342.28	23.2	2.4
9353-067.1	IP449-1	109.7	113.43	1.0682	0.02246	60	5	0.00011548	3.593e-05	0.002	0.00062	0.30033	0.00721	0.12361	0.0043	0.43963	0.00608	9.35696	0.1633	0.15437	0.0014	0.8574	2348.97	27.29	2394.85	15.49	1.9
9353-068.1	IP449-1	173.27	118.38	0.70579	0.01572	87	2	3.594e-05	4.475e-05	0.00062	0.00078	0.2033	0.00475	0.12389	0.0043	0.4301	0.00544	8.85184	0.13528	0.14927	0.00106	0.8863	2306.15	24.58	2337.56	12.26	1.3
9353-069.1	IP449-1	51.72	67.45	1.34728	0.03261	22	2	0.00014361	0.00011165	0.00249	0.00194	0.38185	0.00698	0.09472	0.00324	0.33421	0.00529	5.37142	0.14174	0.11656	0.00224	0.691	1858.78	25.61	1904.18	34.95	2.4
9353-070.1	IP449-1	157.92	70.91	0.46386	0.0097	60	5	9.585e-05	4.339e-05	0.00166	0.00075	0.13358	0.00275	0.10165	0.00328	0.35297	0.00477	5.94597	0.09808	0.12218	0.00097	0.8799	1948.77	22.79	1988.23	14.12	2
9353-071.1	IP449-1	205.88	311.76	1.56435	0.03288	85	6	0.00010323	3.157e-05	0.00179	0.00055	0.44885	0.00555	0.08794	0.00257	0.3065	0.00491	4.89282	0.10284	0.11578	0.00136	0.8326	1723.46	24.3	1892.03	21.26	8.9
9353-072.1	IP449-1	62.06	134.37	2.23651	0.04926	30	6	0.00037678	0.00022707	0.00653	0.00394	0.65189	0.01261	0.09261	0.00311	0.31771	0.00523	4.78291	0.19335	0.10918	0.00381	0.5149	1778.54	25.61	1785.84	65.06	0.4
9353-073.1	IP449-1	58.65	44.05	0.77591	0.01695	30	6	0.00028887	8.439e-05	0.00501	0.00146	0.22068	0.00483	0.12159	0.00412	0.4275	0.00596	8.69479	0.17672	0.14751	0.00194	0.7665	2294.43	26.95	2317.27	22.74	1
9353-076.1	IP449-1	32.02	16.45	0.53067	0.01281	18	4	0.00028695	0.00011771	0.00497	0.00204	0.13949	0.00567	0.13164	0.00675	0.50082	0.00999	12.4842	0.38226	0.18079	0.00377	0.7367	2617.3	43.06	2660.16	35.01	1.6
9353-077.1	IP449-1	219.91	110.57	0.51944	0.01088	103	5	6.137e-05	3.379e-05	0.00106	0.00059	0.14421	0.00198	0.11734	0.00334	0.42267	0.00574	8.63892	0.13814	0.14824	0.00102	0.9036	2272.6	26.07	2325.68	11.88	2.3
9353-078.1	IP449-1	121.86	61.48	0.52116	0.011	51	2	5.229e-05	7.123e-05	0.00091	0.00123	0.14585	0.00624	0.107	0.00537	0.38233	0.00599	7.23106	0.14322	0.13717	0.00141	0.8562	2087.14	28	2191.8	18.04	4.8
9353-079.1	IP449-1	67.37	80.33	1.2317	0.05868	51	2	6.373e-05	8.856e-05	0.0011	0.00153	0.32363	0.0047	0.14839	0.00765	0.56474	0.00753	17.7735	0.2958	0.22826	0.00192	0.8646	2886.2	31.1	3039.86	13.57	5.1
9353-080.1	IP449-1	146.59	35.53	0.25041	0.00573	69	3	6.025e-05	3.28e-05	0.00104	0.00057	0.07129	0.00171	0.1266	0.00453	0.44468	0.00604	9.8032	0.17364	0.15989	0.00157	0.8362	2371.54	27.02	2454.51	16.65	3.4
9353-081.1	IP449-1	94.92	73.29	0.79768	0.01692	50	4	0.00010233	4.467e-05	0.00177	0.00077	0.2187	0.00387	0.12274	0.00388	0.44769	0.00689	9.65017	0.18082	0.15633	0.0014	0.8813	2384.99	30.77	2416.39	15.23	1.3
9353-082.1	IP449-1	111.42	107.88	1.00022	0.02184	65	5	0.00010796	3.47e-05	0.00187	0.0006	0.27939	0.00384	0.13119	0.00396	0.46967	0.00737	10.9794	0.22242	0.16954	0.00187	0.8425	2482.13	32.41	2553.14	18.54	2.8
9353-083.1	IP449-1	128.99	89.71	0.71852	0.01534	49	6	0.00016539	7.114e-05	0.00287	0.00123	0.20522	0.00652	0.09543	0.00386	0.33412	0.00434	5.35979	0.11364	0.11635	0.00177	0.7027	1858.3	21.02	1900.81	27.58	2.2
9353-084.1	IP449-1	164.7	113.55	0.7122	0.01526	64	4	7.941e-05	4.537e-05	0.00138	0.00079	0.20845	0.00315	0.09921	0.00297	0.33897	0.00493	5.5414	0.10598	0.11857	0.00127	0.8312	1881.7	23.8	1934.72	19.31	2.7
9353-086.1	IP449-1	96.45	76.48	0.81916	0.01735	38	4	0.00015784	6.107e-05	0.00274	0.00106	0.2364	0.00805	0.09689	0.00411	0.33576	0.00465	5.40581	0.12636	0.11677	0.00201	0.684	1866.23	22.46	1907.36	31.19	2.2
9353-087.1	IP449-1	83.74	53.56	0.66068	0.01562	44	4	0.00010835	5.493e-05	0.00188	0.00095	0.18754	0.00389	0.12902	0.00471	0.45454	0.00845	10.4067	0.25421	0.16605	0.00227	0.831	2415.38	37.55	2518.23	23.2	4.1
9353-089.1	IP449-1	144.89	77.06	0.54945	0.01152	77	6	9.954e-05	2.952e-05	0.00173	0.00051	0.15598	0.00226	0.13215	0.00404	0.46553	0.00788	10.4595	0.19693	0.16295	0.00104	0.9418	2463.92	34.77	2486.53	10.8	0.9
9353-090.1	IP449-1	132.06	67.89	0.53106	0.01113	76	4	7.429e-05	4.796e-05	0.00129	0.00083	0.14568	0.00343	0.13777	0.00469	0.50223	0.00642	12.788	0.19151	0.18467	0.00117	0.9068	2623.36	27.61	2695.28	10.55	2.7
9353-091.1	IP449-1	219.25	100.74	0.47467	0.01058	118	5	5.072e-05	1.553e-05	0.00088	0.00027	0.13196	0.00321	0.13282	0.00469	0.47778	0.00604	11.3531	0.15476	0.17234	0.00064	0.9623	2517.58	26.42	2580.5	6.26	2.4
9353-092.1	IP449-1	108.58	48.11	0.45771	0.01047	56	4	9.587e-05	5.274e-05	0.00166	0.00091	0.12975	0.00398	0.13021	0.00527	0.45933	0.00608	10.4861	0.16804	0.16557	0.00125	0.885	2436.62	26.92	2513.36	12.7	3.1
9353-094.1	IP449-1	29.01	0.27	0.00949	0.0007	10	3	0.00030474	0.00026856	0.00528	0.00465	0.01261	0.01012	0.45516	0.36714	0.34269	0.00815	5.80335	0.2982	0.12282	0.00524	0.5667	1899.57	39.25	1997.65	77.84	4.9
9353-095.1	IP449-1	156.12	75.35	0.49857	0.01115	81	3	5.404e-05	2.527e-05	0.00094	0.00044	0.14006	0.00179	0.13007	0.00373	0.46301	0.00586	10.6168	0.16609	0.1663	0.00129	0.8704	2452.85	25.85	2520.77	13.1	2.7
9353-096.1	IP449-1	57.92	30.21	0.53883	0.01411	35	1	4.018e-05	6.09e-05	0.0007	0.00106	0.14477	0.00404	0.13996	0.00571	0.52093	0.00737	13.8336	0.23709	0.1926	0.00155	0.8843	2703.12	31.31	2764.49	13.3	2.2
9353-097.1	IP449-1	185.87	92.57	0.51449	0.01105	102	4	4.822e-05	1.831e-05	0.00084	0.00032	0.1441	0.00156	0.13609	0.00373	0.48588	0.00639	11.694	0.17571	0.17456	0.00102	0.9233	2552.82	27.77	2601.81	9.73	1.9
9353-098.1	IP449-1	146.82	74.87	0.52681	0.01197	75	6	0.00010697	3.662e-05	0.00185	0.00063	0.14684	0.00222	0.12621	0.00381	0.45281	0.00585	10.1117	0.1659	0.16196	0.0014	0.8532	2407.75	26.01	2476.21	14.63	2.8
9353-099.1	IP449-1	112.57	75.48	0.69268	0.01814	61	3	6.977e-05	3.743e-05	0.00121	0.00065	0.19376	0.0028	0.12969	0.0043	0.46363	0.00665	10.2906	0.17489	0.16098	0.00121	0.8994	2455.56	29.37	2465.97	12.7	0.4
9353-100.1	IP449-1	34.65	26.64	0.7942	0.02054	13	7	0.00073747	0.00024616	0.01278	0.00427	0.23063	0.01281	0.09248	0.00587	0.31847	0.00528	4.77371	0.20613	0.10871	0.00412	0.4932	1782.25	25.84	1777.99	70.72	-0.2
07RAT-32b
9354-002.1	IP480-1	154.3	133.53	0.89401	0.02009	62	0	6.46e-06	1.721e-05	0.00011	0.0003	0.25451	0.00367	0.09646	0.00301	0.33884	0.00549	5.50392	0.1076	0.11781	0.00107	0.8867	1881.08	26.48	1923.25	16.42	2.2
9354-004.1	IP480-1	102.84	32.91	0.33057	0.00729	55	1	1.978e-05	3.936e-05	0.00034	0.00068	0.08697	0.00241	0.12892	0.00501	0.48999	0.00777	11.9344	0.21644	0.17665	0.00125	0.9225	2570.64	33.69	2621.66	11.78	1.9
9354-005.1	IP480-1	142.91	128.57	0.92942	0.01948	85	1	1.233e-05	1.466e-05	0.00021	0.00025	0.24589	0.00581	0.12904	0.0046	0.48774	0.00806	11.7441	0.20591	0.17464	0.00072	0.972	2560.89	35.02	2602.57	6.93	1.6
9354-007.1	IP480-1	269.54	8.54	0.03271	0.00142	134	1	1.039e-05	1.194e-05	0.00018	0.00021	0.00582	0.00054	0.08695	0.009	0.48836	0.00757	11.8182	0.19565	0.17551	0.00074	0.9678	2563.56	32.86	2610.94	7.01	1.8
9354-009.1	IP480-1	262.33	385.69	1.51888	0.06735	168	39	0.00036195	3.588e-05	0.00627	0.00062	0.378	0.02557	0.1198	0.01441	0.48138	0.04286	11.3149	1.49935	0.17047	0.01494	0.7546	2533.28	189.28	2562.31	154.62	1.1
9354-011.1	IP480-1	237.88	110.51	0.47991	0.01027	142	1	1e-05	1e-05	0.00017	0.00017	0.13136	0.00267	0.14479	0.00486	0.52896	0.00842	13.4161	0.23626	0.18395	0.00107	0.9452	2737.05	35.61	2688.82	9.61	-1.8
9354-012.1	IP480-1	134.93	138.87	1.06321	0.0238	53	0	1.018e-05	2.29e-05	0.00018	0.0004	0.29399	0.00398	0.09005	0.00275	0.32568	0.00515	5.32601	0.10949	0.11861	0.00134	0.8377	1817.42	25.08	1935.33	20.4	6.1
9354-013.1	IP480-1	184.24	78.52	0.44024	0.00926	64	1	2.179e-05	3.926e-05	0.00038	0.00068	0.12434	0.00363	0.09232	0.00367	0.32688	0.00555	5.08984	0.1027	0.11293	0.00102	0.8969	1823.23	27.01	1847.13	16.36	1.3
9354-014.1	IP480-1	134.63	65.59	0.50332	0.0119	76	1	2.447e-05	1.908e-05	0.00042	0.00033	0.13643	0.00243	0.13584	0.00465	0.50114	0.00862	11.9159	0.22119	0.17245	0.00089	0.9613	2618.69	37.12	2581.59	8.64	-1.4
9354-015.1	IP480-1	198.38	77.27	0.4024	0.00858	109	1	1.418e-05	1.282e-05	0.00025	0.00022	0.10923	0.00243	0.13448	0.00513	0.49541	0.01111	11.9537	0.36877	0.175	0.00325	0.8021	2594.05	48.06	2606.03	31.27	0.5
9354-017.1	IP480-1	83.69	81.36	1.00423	0.02383	51	1	2.181e-05	3.85e-05	0.00038	0.00067	0.25371	0.02155	0.12585	0.0113	0.49812	0.00841	12.0703	0.22721	0.17575	0.00114	0.9401	2605.69	36.3	2613.14	10.81	0.3
9354-018.1	IP480-1	195.72	61.67	0.32552	0.00747	102	3	3.662e-05	2.014e-05	0.00063	0.00035	0.08099	0.00184	0.12019	0.00447	0.48309	0.00889	11.9038	0.33386	0.17871	0.00339	0.741	2540.71	38.78	2640.96	31.87	3.8
9354-020.1	IP480-1	191.75	185.72	1.00058	0.02064	76	1	2.459e-05	1.588e-05	0.00043	0.00028	0.27847	0.00531	0.09173	0.00299	0.32958	0.00543	5.31189	0.09635	0.11689	0.00068	0.9477	1836.36	26.36	1909.22	10.52	3.8
9354-021.1	IP480-1	230.71	99.46	0.44538	0.00961	118	1	1.61e-05	1.938e-05	0.00028	0.00034	0.1224	0.00248	0.12716	0.00425	0.46267	0.00713	10.3708	0.17288	0.16257	0.00077	0.9598	2451.36	31.5	2482.54	7.97	1.3
9354-024.1	IP480-1	169.32	85.21	0.51987	0.01101	92	3	3.594e-05	1.372e-05	0.00062	0.00024	0.14352	0.00209	0.13227	0.00405	0.47912	0.00798	11.4062	0.20178	0.17266	0.00074	0.971	2523.45	34.85	2583.6	7.13	2.3
9354-025.1	IP480-1	780.87	633.42	0.83798	0.01925	438	8	2.573e-05	7.07e-06	0.00045	0.00012	0.2334	0.00212	0.12975	0.00396	0.46586	0.00835	10.6724	0.19661	0.16615	0.00042	0.9906	2465.39	36.85	2519.24	4.26	2.1
9354-026.1	IP480-1	223.22	110.65	0.51207	0.01187	83	2	2.339e-05	1.395e-05	0.00041	0.00024	0.1457	0.0026	0.09731	0.00331	0.342	0.00591	5.88886	0.11388	0.12488	0.00084	0.9379	1896.3	28.47	2027.12	12.02	6.5
9354-027.1	IP480-1	272.16	204.42	0.77592	0.016	106	1	1.545e-05	1.059e-05	0.00027	0.00018	0.2168	0.02335	0.09419	0.01065	0.3371	0.00926	5.74773	0.21031	0.12366	0.0026	0.8223	1872.69	44.79	2009.74	37.71	6.8
9354-028.1	IP480-1	485.81	126.94	0.26993	0.00575	174	2	1.209e-05	7.57e-06	0.00021	0.00013	0.0771	0.00309	0.09886	0.00478	0.34612	0.00575	5.84608	0.11872	0.1225	0.0012	0.8786	1916.04	27.61	1992.96	17.48	3.9
9354-029.1	IP480-1	145.12	67.3	0.47906	0.01052	77	0	4.53e-06	1.757e-05	8e-05	0.0003	0.13027	0.00448	0.12913	0.00573	0.47485	0.00826	11.4413	0.21064	0.17475	0.00075	0.9732	2504.79	36.18	2603.67	7.12	3.8
9354-030.1	IP480-1	196.4	232.63	1.22363	0.02803	86	3	4.546e-05	2.459e-05	0.00079	0.00043	0.343	0.0053	0.09418	0.00347	0.33599	0.0082	8.13982	0.23364	0.17571	0.00217	0.9039	1867.35	39.68	2612.75	20.75	28.5
9354-031.1	IP480-1	224.08	142.56	0.65723	0.01444	69	3	4.883e-05	2.956e-05	0.00085	0.00051	0.177	0.00351	0.07456	0.00256	0.27686	0.00481	4.58217	0.09421	0.12004	0.00108	0.9003	1575.52	24.34	1956.76	16.19	19.5
9354-032.1	IP480-1	246.61	114.01	0.47762	0.01072	81	0	7.22e-06	1.21e-05	0.00013	0.00021	0.12642	0.00292	0.0803	0.00297	0.30337	0.00554	5.19553	0.11759	0.12421	0.0014	0.8694	1707.99	27.47	2017.57	20.12	15.3
9354-034.1	IP480-1	250.96	92.89	0.38239	0.00827	117	1	7.49e-06	1.469e-05	0.00013	0.00025	0.10991	0.00431	0.12273	0.00734	0.42699	0.01693	9.43812	0.53527	0.16031	0.00575	0.7783	2292.15	76.94	2458.94	61.98	6.8
9354-035.1	IP480-1	226.99	203.58	0.9265	0.01946	63	3	6.14e-05	3.084e-05	0.00106	0.00053	0.2511	0.00482	0.06407	0.0022	0.23641	0.00454	3.87988	0.0827	0.11903	0.00085	0.9432	1368.03	23.73	1941.66	12.82	29.5
9354-036.1	IP480-1	101.33	73.5	0.7493	0.01805	36	2	6.056e-05	5.83e-05	0.00105	0.00101	0.20256	0.00528	0.08384	0.00329	0.31014	0.00516	5.13724	0.12117	0.12013	0.00178	0.7832	1741.4	25.42	1958.22	26.63	11.1
9354-038.1	IP480-1	236.2	108.65	0.47519	0.00988	113	1	1.04e-05	1.888e-05	0.00018	0.00033	0.13769	0.00235	0.12488	0.00391	0.43098	0.00691	9.05441	0.16367	0.15237	0.001	0.9328	2310.14	31.22	2372.7	11.24	2.6
9354-040.1	IP480-1	268.18	133.16	0.51295	0.01176	144	8	6.95e-05	1.607e-05	0.0012	0.00028	0.14309	0.00181	0.13118	0.00401	0.47023	0.00738	11.7198	0.22252	0.18076	0.00161	0.8853	2484.56	32.45	2659.89	14.82	6.6
9354-041.1	IP480-1	235.96	163.89	0.71755	0.01619	93	3	4.793e-05	1.637e-05	0.00083	0.00028	0.19919	0.0026	0.0962	0.00293	0.34653	0.00546	5.83396	0.11096	0.1221	0.00108	0.8872	1918.02	26.21	1987.15	15.82	3.5
9354-044.1	IP480-1	55.62	74.77	1.38877	0.03219	36	0	1e-05	1e-05	0.00017	0.00017	0.37173	0.00597	0.13178	0.00442	0.49233	0.00893	11.665	0.23605	0.17184	0.0012	0.9397	2580.76	38.7	2575.65	11.7	-0.2
9354-045.1	IP480-1	167.23	106.36	0.65703	0.01595	65	2	4.332e-05	2.124e-05	0.00075	0.00037	0.18128	0.00677	0.09632	0.0047	0.3491	0.00696	5.84751	0.13758	0.12148	0.00124	0.9019	1930.32	33.35	1978.12	18.35	2.4
9354-046.1	IP480-1	48.85	20.62	0.43608	0.01026	27	0	9.01e-06	9.04e-05	0.00016	0.00157	0.12202	0.00511	0.13875	0.00741	0.49588	0.01157	12.7558	0.4312	0.18657	0.00405	0.7705	2596.05	50.05	2712.12	36.27	4.3
9354-048.1	IP480-1	173.83	44.1	0.26207	0.00589	83	3	4.271e-05	1.976e-05	0.00074	0.00034	0.06835	0.00216	0.11697	0.00495	0.44846	0.00766	10.7008	0.2005	0.17306	0.00101	0.951	2388.39	34.2	2587.44	9.78	7.7
9354-049.1	IP480-1	769.43	266.12	0.3573	0.00768	232	4	2.197e-05	1.215e-05	0.00038	0.00021	0.1048	0.00922	0.08372	0.0119	0.28545	0.03127	4.87899	0.76123	0.12397	0.01218	0.7808	1618.73	158.74	2014.09	185.43	19.6
9354-050.1	IP480-1	132.24	67.82	0.52979	0.01153	76	0	8.67e-06	2.322e-05	0.00015	0.0004	0.13608	0.00427	0.12943	0.00552	0.50392	0.00956	13.1987	0.29272	0.18996	0.00178	0.9079	2630.61	41.09	2741.84	15.5	4.1
9354-051.1	IP480-1	38.69	45.48	1.21435	0.03826	22	1	4.99e-05	6.815e-05	0.00086	0.00118	0.32396	0.01229	0.11616	0.00625	0.43542	0.00933	11.4669	0.31946	0.191	0.00293	0.838	2330.09	42.04	2750.81	25.41	15.3
9354-052.1	IP480-1	135.7	96.98	0.73834	0.01951	66	3	5.463e-05	3.974e-05	0.00095	0.00069	0.18442	0.00783	0.10482	0.00573	0.41964	0.00921	9.69533	0.27062	0.16757	0.00246	0.8524	2258.85	41.97	2533.47	24.89	10.8
9354-053.1	IP480-1	296.85	112.45	0.39135	0.00813	105	3	3.221e-05	1.109e-05	0.00056	0.00019	0.10956	0.00381	0.09322	0.00408	0.33297	0.00553	5.6351	0.10207	0.12274	0.00067	0.9549	1852.76	26.82	1996.47	9.66	7.2
9354-054.1	IP480-1	66.73	51.34	0.79483	0.02064	23	1	6.578e-05	6.637e-05	0.00114	0.00115	0.21624	0.01252	0.08287	0.00545	0.30462	0.00527	4.89362	0.11091	0.11651	0.00147	0.8331	1714.15	26.09	1903.41	22.88	9.9
9354-056.1	IP480-1	103.61	44.97	0.44837	0.01131	34	0	1.67e-05	7.13e-05	0.00029	0.00124	0.12324	0.0047	0.08416	0.00415	0.3062	0.0057	4.94923	0.12128	0.11723	0.00161	0.8303	1721.98	28.21	1914.39	24.91	10.1
9354-057.1	IP480-1	377.08	211.73	0.58005	0.01258	137	2	1.882e-05	4.442e-05	0.00033	0.00077	0.14496	0.00384	0.08017	0.00314	0.32079	0.00606	7.49237	0.20644	0.16939	0.00302	0.766	1793.59	29.62	2551.65	30.21	29.7
9354-058.1	IP480-1	211.94	130.04	0.63383	0.01583	88	1	1.592e-05	4.133e-05	0.00028	0.00072	0.18136	0.00656	0.10215	0.00515	0.35699	0.00879	8.506	0.29792	0.17281	0.0038	0.7819	1967.9	41.91	2585.04	37.22	23.9
9354-059.1	IP480-1	439.05	357.69	0.84164	0.01879	136	1	1e-05	1e-05	0.00017	0.00017	0.20946	0.00353	0.06697	0.00253	0.26909	0.00684	4.56431	0.12294	0.12302	0.00078	0.9724	1536.17	34.81	2000.5	11.29	23.2
9354-060.1	IP480-1	199.77	133.17	0.68867	0.0147	61	2	4.549e-05	6.665e-05	0.00079	0.00116	0.17216	0.00647	0.06845	0.00328	0.2738	0.00572	4.72116	0.12838	0.12506	0.00188	0.8369	1560.08	29	2029.6	26.8	23.1
9354-061.1	IP480-1	681.85	183.25	0.27764	0.00589	171	0	8e-08	1.462e-05	0	0.00025	0.08005	0.00219	0.07022	0.00294	0.24353	0.00572	3.96067	0.11892	0.11795	0.00188	0.8492	1405.02	29.74	1925.47	28.91	27
9354-063.1	IP480-1	317.23	173.69	0.56561	0.01223	137	1	1e-05	1e-05	0.00017	0.00017	0.15722	0.00577	0.1045	0.00479	0.37596	0.00638	9.11952	0.17928	0.17593	0.00141	0.9143	2057.37	29.96	2614.84	13.42	21.3
9354-064.1	IP480-1	129.07	47.65	0.38141	0.0084	67	1	2.693e-05	1.793e-05	0.00047	0.00031	0.1032	0.00726	0.12731	0.00971	0.47053	0.00917	11.3878	0.23852	0.17553	0.00099	0.9638	2485.9	40.31	2611.07	9.4	4.8
9354-067.1	IP480-1	196.67	158.87	0.8345	0.02377	86	0	3.69e-06	3.746e-05	6e-05	0.00065	0.22954	0.00564	0.09927	0.00435	0.3609	0.00811	9.08165	0.23423	0.1825	0.00185	0.9207	1986.46	38.54	2675.75	16.89	25.8
9354-071.1	IP480-1	104.14	107.87	1.06998	0.02345	39	1	2.689e-05	4.234e-05	0.00047	0.00073	0.28617	0.00839	0.08357	0.00339	0.31246	0.00543	5.29862	0.12001	0.12299	0.00154	0.8366	1752.8	26.74	2000.04	22.38	12.4
9354-072.1	IP480-1	115.14	105.42	0.94586	0.02197	57	1	2.07e-05	2.37e-05	0.00036	0.00041	0.25611	0.00414	0.11146	0.00368	0.41162	0.00698	8.46466	0.16871	0.14915	0.00128	0.9046	2222.33	31.96	2336.16	14.73	4.9
9354-072.1	IP480-2	107.99	69.97	0.66936	0.01937	65	8	0.00016877	0.00025904	0.00293	0.00449	0.18862	0.01773	0.14376	0.01431	0.51017	0.00769	13.0618	0.37913	0.18569	0.00427	0.6181	2657.35	32.89	2704.36	38.47	1.7
9354-073.1	IP480-1	65.54	61.28	0.96592	0.02127	33	3	0.00013764	0.00010652	0.00239	0.00185	0.2585	0.00648	0.11062	0.00413	0.41333	0.00693	9.44458	0.2082	0.16573	0.00205	0.8305	2230.11	31.68	2514.93	20.95	11.3
9354-074.1	IP480-1	123.01	44.13	0.37064	0.01141	50	1	1.868e-05	3.231e-05	0.00032	0.00056	0.09786	0.01101	0.09966	0.01637	0.37746	0.04366	8.6433	1.45822	0.16608	0.01814	0.7666	2064.39	207.65	2518.5	196.22	18
9354-074.1	IP480-2	169.18	38.9	0.23754	0.00692	76	3	4.625e-05	3.09e-05	0.0008	0.00054	0.06657	0.00255	0.12057	0.00604	0.43025	0.00609	9.02835	0.14994	0.15219	0.00108	0.9054	2306.85	27.5	2370.67	12.17	2.7
9354-075.1	IP480-2	117.79	126.37	1.10836	0.02591	52	12	0.00033431	9.65e-05	0.00579	0.00167	0.29912	0.0084	0.09744	0.00401	0.36104	0.00686	6.15391	0.17698	0.12362	0.00239	0.7447	1987.11	32.57	2009.13	34.74	1.1
9354-077.1	IP480-2	144.08	101.04	0.72447	0.01593	85	2	2.836e-05	2.031e-05	0.00049	0.00035	0.19908	0.00596	0.13662	0.00549	0.49716	0.00758	11.8881	0.20482	0.17343	0.0011	0.9306	2601.56	32.7	2591	10.65	-0.4
9354-078.1	IP480-2	73.42	52.01	0.73185	0.0213	44	1	2.713e-05	5.934e-05	0.00047	0.00103	0.20991	0.00655	0.14353	0.00667	0.50044	0.00917	12.0288	0.27752	0.17433	0.00208	0.859	2615.67	39.53	2599.66	19.99	-0.6
9354-079.1	IP480-2	127.93	60.85	0.49141	0.01332	69	4	8.049e-05	3.519e-05	0.00139	0.00061	0.13326	0.007	0.12958	0.00792	0.47782	0.00754	11.8726	0.2305	0.18021	0.00172	0.8737	2517.78	32.96	2654.79	15.87	5.2
9354-080.1	IP480-2	307.14	176.52	0.59372	0.01887	114	6	6.153e-05	3.182e-05	0.00107	0.00055	0.1422	0.00631	0.08188	0.00462	0.34187	0.00486	5.80593	0.1009	0.12317	0.00103	0.8778	1895.66	23.38	2002.67	14.98	5.3
9354-082.1	IP480-1	162.18	71.3	0.45415	0.01215	70	3	5.919e-05	3.478e-05	0.00103	0.0006	0.11266	0.00381	0.09597	0.00454	0.38689	0.00752	9.69933	0.21938	0.18183	0.0017	0.9117	2108.37	35.07	2669.6	15.6	21
9354-083.1	IP480-1	121.58	16.59	0.14093	0.00484	45	0	1.174e-05	8.624e-05	0.0002	0.00149	0.03941	0.00487	0.10097	0.01324	0.36108	0.00962	8.23627	0.25502	0.16544	0.00212	0.9118	1987.28	45.7	2511.98	21.71	20.9
9354-083.1	IP480-2	219.32	38.21	0.17997	0.00649	91	7	9.594e-05	4.485e-05	0.00166	0.00078	0.03316	0.00222	0.07405	0.0058	0.40186	0.00747	9.12081	0.18978	0.16461	0.0012	0.9372	2177.58	34.44	2503.59	12.37	13
9354-084.1	IP480-1	78.65	56.68	0.74457	0.01919	46	2	4.556e-05	3.129e-05	0.00079	0.00054	0.17583	0.00872	0.11762	0.00769	0.49809	0.0169	12.444	0.61173	0.1812	0.00572	0.7705	2605.56	73.13	2663.87	53.31	2.2
9354-084.1	IP480-2	43.06	27.43	0.65803	0.03053	26	3	0.00016362	0.00023484	0.00284	0.00407	0.17403	0.01137	0.13806	0.01143	0.52202	0.01083	13.6467	0.49546	0.1896	0.00518	0.6655	2707.73	46.04	2738.71	45.65	1.1
9354-085.1	IP480-2	275.36	255.63	0.95906	0.02078	172	6	5.072e-05	4.004e-05	0.00088	0.00069	0.2646	0.00603	0.13836	0.00478	0.50149	0.00721	12.6303	0.21001	0.18266	0.00123	0.9152	2620.19	31.02	2677.2	11.22	2.1
9354-086.1	IP480-1	228.79	122.88	0.55485	0.02233	74	2	3.858e-05	4.939e-05	0.00067	0.00086	0.16218	0.00627	0.0851	0.00498	0.29115	0.00509	4.97366	0.10742	0.1239	0.00132	0.8715	1647.26	25.47	2013.09	19.05	18.2
9354-086.1	IP480-2	153.61	92.78	0.62398	0.01613	62	2	3.591e-05	7.125e-05	0.00062	0.00123	0.19461	0.0119	0.11093	0.00757	0.35565	0.0056	6.02824	0.19518	0.12293	0.00324	0.5885	1961.54	26.7	1999.2	47.64	1.9
9354-087.1	IP480-2	310.84	88.74	0.29492	0.00651	115	24	0.00024637	0.00010089	0.00427	0.00175	0.05375	0.00423	0.06654	0.00553	0.36507	0.00561	6.04139	0.14662	0.12002	0.00203	0.7211	2006.15	26.57	1956.55	30.57	-2.5
9354-089.1	IP480-2	77.07	53.91	0.72266	0.01708	43	2	6.364e-05	6.701e-05	0.0011	0.00116	0.19796	0.01385	0.12758	0.00965	0.46574	0.00759	11.6436	0.27323	0.18132	0.00272	0.7741	2464.85	33.46	2664.97	25.02	7.5
9354-094.1	IP480-2	677.64	322.82	0.49213	0.01191	351	26	9.394e-05	2.069e-05	0.00163	0.00036	0.12631	0.00222	0.12015	0.00413	0.46813	0.00796	10.3404	0.18642	0.1602	0.00067	0.9728	2475.34	35.06	2457.82	7.14	-0.7
9354-1.1	IP480-1	182.11	72.95	0.41382	0.00962	84	1	1e-05	1e-05	0.00017	0.00017	0.11233	0.00238	0.11596	0.0041	0.42718	0.00689	8.73534	0.15012	0.14831	0.00063	0.9696	2292.98	31.2	2326.53	7.28	1.4
9354-102.1	IP480-2	98.99	53.83	0.56174	0.01326	37	2	8.389e-05	0.00010194	0.00145	0.00177	0.15759	0.03241	0.09583	0.01991	0.34159	0.00604	5.54406	0.15312	0.11771	0.00225	0.7272	1894.32	29.11	1921.77	34.66	1.4
9354-103.1	IP480-2	249.5	107.38	0.44459	0.00965	94	5	7.168e-05	3.028e-05	0.00124	0.00052	0.11953	0.00571	0.09459	0.00518	0.35183	0.00551	5.87382	0.1058	0.12108	0.00087	0.9191	1943.33	26.33	1972.26	12.8	1.5
9354-104.1	IP480-2	330.74	283.99	0.88705	0.02011	143	6	5.388e-05	2.266e-05	0.00093	0.00039	0.2482	0.00466	0.10224	0.00335	0.3654	0.00523	6.20809	0.10265	0.12322	0.00082	0.9159	2007.74	24.73	2003.37	11.93	-0.2
9354-105.1	IP480-2	423.79	405.26	0.98787	0.02038	196	3	1.934e-05	2.527e-05	0.00034	0.00044	0.30443	0.00455	0.11616	0.00348	0.37694	0.00592	6.30001	0.12268	0.12122	0.00118	0.869	2061.96	27.78	1974.25	17.41	-4.4
07RAT-10	Euhedral grains picked separately from random sampling of grains in general population
9355-001.1	IP480-1	197.66	67.61	0.35337	0.00897	69	1	1e-05	1e-05	0.00017	0.00017	0.09745	0.00359	0.09256	0.00439	0.33563	0.00524	5.30583	0.09127	0.11465	0.00063	0.9481	1865.63	25.35	1874.44	9.98	0.5
9355-002.1	IP480-1	176.97	77.05	0.44981	0.00965	65	2	3.079e-05	2.404e-05	0.00053	0.00042	0.1207	0.00479	0.09343	0.00452	0.34817	0.00608	5.4791	0.10659	0.11414	0.00076	0.9408	1925.84	29.15	1866.28	12.05	-3.2
9355-006.1	IP480-1	173.33	75.44	0.44962	0.00973	62	2	3.409e-05	2.561e-05	0.00059	0.00044	0.12552	0.00273	0.09392	0.00331	0.33642	0.00585	5.35488	0.1099	0.11544	0.00103	0.9017	1869.44	28.28	1886.78	16.19	0.9
9355-007.1	IP480-1	191.18	79.41	0.42909	0.00908	68	1	2.119e-05	1.585e-05	0.00037	0.00027	0.12043	0.00206	0.09451	0.00296	0.33675	0.0052	5.35353	0.08998	0.1153	0.00057	0.9564	1871	25.15	1884.61	8.94	0.7
9355-008.1	IP480-1	165.92	57.69	0.35922	0.00814	59	0	7.49e-06	2.582e-05	0.00013	0.00045	0.09528	0.00322	0.09068	0.00405	0.34188	0.00625	5.3695	0.10709	0.11391	0.00068	0.9546	1895.73	30.11	1862.67	10.86	-1.8
9355-009.1	IP480-1	237.8	211.29	0.91789	0.01977	83	2	4.019e-05	2.24e-05	0.0007	0.00039	0.26803	0.00327	0.08671	0.0026	0.29695	0.00504	4.1517	0.07937	0.1014	0.00071	0.9325	1676.18	25.08	1649.89	12.96	-1.6
9355-011.1	IP480-1	153.6	124.86	0.83978	0.0188	47	0	1e-05	1e-05	0.00017	0.00017	0.232	0.00509	0.07344	0.00258	0.26584	0.00418	3.72161	0.06744	0.10153	0.00074	0.9179	1519.65	21.33	1652.33	13.49	8
9355-014.1	IP480-1	41.12	37.24	0.93549	0.0211	12	2	0.00020175	0.00011464	0.0035	0.00199	0.22511	0.00865	0.06103	0.00306	0.25365	0.00587	3.58096	0.12807	0.10239	0.00251	0.733	1457.25	30.27	1667.94	46.05	12.6
9355-015.1	IP480-1	196.28	310.24	1.63283	0.03436	69	2	5.27e-05	2.166e-05	0.00091	0.00038	0.4524	0.01594	0.0728	0.00392	0.26273	0.00919	3.66821	0.17752	0.10126	0.00297	0.7984	1503.82	47.07	1647.33	55.48	8.7
9355-016.1	IP480-1	121.16	71.53	0.60988	0.01544	32	2	7e-05	7.117e-05	0.00121	0.00123	0.16767	0.02751	0.06598	0.01102	0.23999	0.00435	3.7111	0.11764	0.11215	0.00267	0.6664	1386.66	22.68	1834.56	43.8	24.4
9355-020.1	IP480-1	230.24	98.06	0.43997	0.01056	76	3	4.262e-05	1.686e-05	0.00074	0.00029	0.12193	0.00743	0.08607	0.00581	0.31055	0.00515	4.92695	0.09013	0.11506	0.00068	0.9476	1743.43	25.41	1880.89	10.65	7.3
9355-022.1	IP480-1	178.81	148.15	0.85594	0.02035	51	3	8.382e-05	9.493e-05	0.00145	0.00165	0.23982	0.00575	0.06894	0.00294	0.24604	0.00643	3.41115	0.11787	0.10055	0.00197	0.8269	1418.03	33.34	1634.32	36.83	13.2
9355-022.2	IP480-1	124.36	87.91	0.73024	0.02092	37	3	0.00010594	9.797e-05	0.00184	0.0017	0.20227	0.00774	0.07444	0.00378	0.26874	0.00463	3.6913	0.10003	0.09962	0.00188	0.7229	1534.4	23.57	1617	35.55	5.1
9355-022.2.2	IP480-1	123.48	87.55	0.73245	0.01609	37	1	4.782e-05	8.47e-05	0.00083	0.00147	0.20023	0.0073	0.07403	0.00338	0.27081	0.00445	3.8162	0.09255	0.1022	0.00162	0.7599	1544.9	22.63	1664.5	29.69	7.2
9355-023.1	IP480-1	104.27	88.92	0.881	0.02187	28	2	8.835e-05	4.955e-05	0.00153	0.00086	0.25765	0.00994	0.06689	0.00341	0.22873	0.00511	3.2279	0.12241	0.10235	0.00286	0.6816	1327.85	26.88	1667.19	52.65	20.4
9355-024.1	IP480-1	194.79	160.42	0.85077	0.02101	59	4	8.318e-05	5.044e-05	0.00144	0.00087	0.21537	0.00573	0.06809	0.00275	0.26898	0.00472	3.78825	0.08396	0.10215	0.00117	0.8573	1535.62	24.05	1663.47	21.43	7.7
9355-027.1	IP480-1	92.6	55.85	0.62302	0.0162	29	4	0.00017501	7.773e-05	0.00303	0.00135	0.17976	0.01079	0.08125	0.0056	0.28159	0.00611	3.98397	0.1242	0.10261	0.00204	0.7755	1599.36	30.8	1671.91	37.13	4.3
9355-030.1	IP480-1	49.82	45.55	0.94451	0.02581	17	4	0.00030259	0.00026591	0.00524	0.00461	0.25211	0.01456	0.07819	0.00527	0.29295	0.0063	3.95979	0.23064	0.09804	0.00505	0.4796	1656.24	31.47	1587.08	99.5	-4.4
9355-035.1	IP480-1	233.7	171.24	0.75698	0.01606	73	3	5.809e-05	3.371e-05	0.00101	0.00058	0.20907	0.00508	0.07605	0.00277	0.27534	0.00468	3.86019	0.07847	0.10168	0.00094	0.8929	1567.83	23.7	1655.05	17.19	5.3
9355-037.1	IP480-1	231.77	170.65	0.76062	0.01618	75	1	1e-05	1e-05	0.00017	0.00017	0.20904	0.00701	0.0793	0.00345	0.28854	0.00511	4.01379	0.08649	0.10089	0.00104	0.8808	1634.21	25.59	1640.57	19.21	0.4
9355-037.2	IP480-1	192.57	205.22	1.1009	0.02613	59	6	0.00014259	7.291e-05	0.00247	0.00126	0.22023	0.01516	0.05363	0.00421	0.2681	0.00783	3.7072	0.12923	0.10029	0.00157	0.8945	1531.2	39.95	1629.4	29.48	6
9355-037.2.2	IP480-1	189.51	192.04	1.0469	0.02451	55	8	0.0001841	0.00011622	0.00319	0.00201	0.21788	0.00929	0.05309	0.00358	0.2551	0.01193	3.5209	0.19422	0.1001	0.0024	0.9023	1464.7	61.58	1626	45.24	9.9
9355-037.2.3	IP480-1	197.4	226.09	1.1832	0.03163	55	13	0.00029499	0.00012307	0.00511	0.00213	0.1865	0.00912	0.03964	0.00288	0.25151	0.01172	3.3875	0.18736	0.09768	0.0024	0.898	1446.3	60.66	1580.4	46.6	8.5
07RAT-10	Random grain population
9355-044.1	IP480-1	44.06	46.06	1.07999	0.02599	15	1	9.85e-05	0.00010851	0.00171	0.00188	0.29292	0.01533	0.07511	0.00454	0.27695	0.00506	3.924	0.13806	0.10276	0.00286	0.6185	1575.98	25.61	1674.58	52.4	5.9
9355-045.1	IP480-1	30.95	31.7	1.05813	0.02743	13	4	0.00045679	0.00021482	0.00792	0.00372	0.26252	0.01199	0.09041	0.00502	0.3644	0.00664	6.00725	0.2375	0.11956	0.00393	0.5651	2003.01	31.47	1949.68	59.94	-2.7
9355-047.1	IP480-1	105.14	146.35	1.438	0.03021	50	1	1.752e-05	2.848e-05	0.0003	0.00049	0.40442	0.0099	0.10192	0.00371	0.36238	0.00611	6.17391	0.11718	0.12356	0.00085	0.933	1993.46	28.95	2008.31	12.27	0.7
9355-048.1	IP480-1	274.14	284.92	1.07369	0.02215	171	4	3.7e-05	4.695e-05	0.00064	0.00081	0.25757	0.00401	0.12063	0.00376	0.50285	0.00879	12.8523	0.26557	0.18537	0.00168	0.9004	2626.04	37.8	2701.51	15.04	2.8
9355-050.1	IP480-1	304.54	86.31	0.29277	0.00658	152	1	7.74e-06	1.6e-05	0.00013	0.00028	0.07935	0.00284	0.12637	0.00568	0.46623	0.00715	10.4465	0.18234	0.1625	0.00108	0.9266	2467.02	31.53	2481.89	11.2	0.6
9355-052.1	IP480-1	13.36	13.57	1.049	0.03425	5	0	1e-05	1e-05	0.00017	0.00017	0.2753	0.01172	0.07675	0.00448	0.29244	0.00674	5.01865	0.16143	0.12446	0.00246	0.7932	1653.73	33.71	2021.18	35.41	18.2
9355-053.1	IP480-1	481.45	118.76	0.25483	0.00523	165	2	1.24e-05	7.32e-06	0.00021	0.00013	0.07394	0.00122	0.09717	0.00306	0.33492	0.00581	5.20295	0.10677	0.11267	0.00101	0.9004	1862.18	28.12	1842.92	16.38	-1
9355-054.1	IP480-1	131.78	59.13	0.46357	0.01028	84	0	5.66e-06	1.571e-05	0.0001	0.00027	0.12428	0.00292	0.1489	0.00542	0.55541	0.00934	15.7497	0.28706	0.20566	0.00108	0.9583	2847.64	38.81	2871.67	8.56	0.8
9355-055.1	IP480-1	111.84	79.25	0.732	0.01669	57	3	7.115e-05	4.409e-05	0.00123	0.00076	0.15819	0.00316	0.0986	0.00392	0.45624	0.01173	9.48903	0.27839	0.15084	0.0017	0.9242	2422.94	52.12	2355.51	19.42	-2.9
9355-056.1	IP480-1	113.31	64.79	0.59072	0.01307	43	1	4.069e-05	4.21e-05	0.00071	0.00073	0.14998	0.00406	0.08818	0.00344	0.34729	0.00601	5.4725	0.11003	0.11428	0.00095	0.9128	1921.66	28.84	1868.64	15.01	-2.8
9355-057.1	IP480-1	250.93	284.97	1.1732	0.02514	142	1	9.43e-06	1.39e-05	0.00016	0.00024	0.33144	0.00423	0.1249	0.00383	0.4421	0.00789	9.44623	0.19923	0.15497	0.00143	0.901	2360.03	35.37	2401.47	15.77	1.7
9355-058.1	IP480-1	169.41	196.46	1.198	0.02494	63	2	5.125e-05	3.175e-05	0.00089	0.00055	0.34221	0.00481	0.08512	0.00261	0.29799	0.00524	4.20224	0.08906	0.10228	0.00101	0.8878	1681.32	26.08	1665.87	18.3	-0.9
9355-059.1	IP480-1	107.03	30.21	0.29163	0.00667	35	1	2.895e-05	3.705e-05	0.0005	0.00064	0.07853	0.00295	0.08587	0.00403	0.31889	0.00521	5.02924	0.12791	0.11438	0.00201	0.7289	1784.31	25.53	1870.17	32	4.6
9355-060.1	IP480-1	128.55	249.62	2.00604	0.04687	64	0	1e-05	1e-05	0.00017	0.00017	0.59429	0.00679	0.09947	0.00339	0.33577	0.00738	5.39352	0.13041	0.1165	0.00089	0.9491	1866.28	35.73	1903.22	13.86	1.9
9355-061.1	IP480-1	106.64	41.03	0.39751	0.0087	38	2	8.036e-05	3.057e-05	0.00139	0.00053	0.10918	0.00282	0.0929	0.00347	0.33823	0.00536	5.54026	0.1235	0.1188	0.00164	0.7883	1878.13	25.86	1938.28	24.95	3.1
9355-062.1	IP480-1	184.51	68.35	0.38266	0.00818	87	2	3.027e-05	1.48e-05	0.00052	0.00026	0.10058	0.00195	0.1141	0.00385	0.43412	0.00755	9.81338	0.18932	0.16395	0.00105	0.9437	2324.27	34.05	2496.79	10.87	6.9
9355-065.1	IP480-1	93.81	77.52	0.85373	0.01951	29	2	0.0001124	4.617e-05	0.00195	0.0008	0.21945	0.00485	0.06947	0.0025	0.27027	0.00459	3.7691	0.07934	0.10114	0.00106	0.8689	1542.18	23.33	1645.19	19.61	6.3
9355-066.1	IP480-1	91.19	59.78	0.67727	0.01559	53	1	3.385e-05	4.255e-05	0.00059	0.00074	0.18481	0.00565	0.13381	0.00557	0.49036	0.00801	12.4261	0.23293	0.18379	0.00135	0.9209	2572.22	34.76	2687.36	12.23	4.3
9355-067.1	IP480-1	325.08	194.47	0.618	0.01266	131	1	1e-05	1e-05	0.00017	0.00017	0.17626	0.00192	0.10254	0.00287	0.35953	0.00564	6.10841	0.11677	0.12322	0.00113	0.8805	1979.94	26.8	2003.42	16.31	1.2
9355-068.1	IP480-1	53.47	33.57	0.64864	0.01874	18	5	0.00037229	8.62e-05	0.00645	0.00149	0.17142	0.00622	0.07989	0.00415	0.30232	0.00705	4.5993	0.16075	0.11034	0.00257	0.7508	1702.78	35.01	1805	42.92	5.7
9355-069.1	IP480-1	103.04	24.03	0.24095	0.00652	51	2	5.174e-05	5.328e-05	0.0009	0.00092	0.06826	0.00312	0.13205	0.00735	0.46614	0.00764	11.1849	0.23605	0.17403	0.00198	0.8444	2466.61	33.69	2596.75	19.13	5
9355-070.1	IP480-1	241.89	92.68	0.39581	0.00996	79	1	1e-05	1e-05	0.00017	0.00017	0.11217	0.00244	0.08823	0.00334	0.31132	0.00564	4.80567	0.10828	0.11196	0.00127	0.8671	1747.2	27.8	1831.4	20.64	4.6
9355-071.1	IP480-1	277.32	109.04	0.40619	0.00879	78	1	1e-05	1e-05	0.00017	0.00017	0.12042	0.0051	0.07798	0.00526	0.26302	0.01259	4.1829	0.22693	0.11534	0.00234	0.9287	1505.29	64.56	1885.21	36.97	20.2
9355-072.1	IP480-1	131.12	92.34	0.72752	0.01758	33	3	0.00010498	0.00010715	0.00182	0.00186	0.2058	0.01346	0.06306	0.00571	0.22294	0.0129	3.14506	0.27676	0.10232	0.00608	0.742	1297.38	68.36	1666.56	114.25	22.2
9355-073.1	IP480-1	114.86	50.78	0.45669	0.01493	41	1	3.116e-05	6.696e-05	0.00054	0.00116	0.12253	0.00878	0.08708	0.00737	0.32454	0.01007	6.66637	0.51603	0.14898	0.01	0.5094	1811.88	49.21	2334.2	119.75	22.4
9355-074.1	IP480-1	176.49	148.48	0.86912	0.02536	42	3	9.495e-05	0.00011952	0.00165	0.00207	0.23585	0.01771	0.05646	0.00482	0.20805	0.00584	2.98053	0.11362	0.1039	0.00234	0.8101	1218.4	31.23	1695	42.11	28.1
9355-077.1	IP480-1	115.63	156.62	1.3993	0.02959	42	1	2.369e-05	4.083e-05	0.00041	0.00071	0.39195	0.01299	0.07859	0.00343	0.28059	0.00535	3.91438	0.09992	0.10118	0.00149	0.8194	1594.34	27	1645.85	27.61	3.1
9355-078.1	IP480-1	68.05	73.89	1.12169	0.02517	29	1	2.7e-05	5.509e-05	0.00047	0.00095	0.3274	0.0114	0.099	0.00441	0.33919	0.00554	5.65251	0.11643	0.12087	0.00129	0.8582	1882.75	26.74	1969.04	19.12	4.4
9355-080.1	IP480-1	256.3	167.46	0.67496	0.01411	85	0	3.1e-06	1.304e-05	5e-05	0.00023	0.19079	0.00274	0.08346	0.00248	0.29525	0.00458	4.61418	0.08848	0.11335	0.00108	0.8706	1667.69	22.83	1853.75	17.29	10
9355-081.1	IP480-1	117.37	84.64	0.74499	0.01745	34	2	6.295e-05	7.225e-05	0.00109	0.00125	0.21185	0.00565	0.07293	0.00296	0.25647	0.00506	3.75497	0.09977	0.10619	0.00165	0.8148	1471.75	25.99	1734.96	28.75	15.2
9355-084.1	IP480-1	143.61	216.74	1.5591	0.03292	49	1	4.16e-05	5.903e-05	0.00072	0.00102	0.45553	0.00761	0.07425	0.00244	0.25413	0.00479	3.52544	0.08884	0.10061	0.00146	0.8196	1459.73	24.65	1635.47	27.27	10.7
9355-085.1	IP480-1	70.72	56.09	0.81932	0.02629	20	3	0.00020794	0.00010275	0.0036	0.00178	0.21721	0.00863	0.06516	0.00364	0.24579	0.00557	3.40038	0.11546	0.10034	0.00227	0.7505	1416.73	28.88	1630.34	42.64	13.1
9355-086.1	IP480-1	191.98	119.07	0.64075	0.01689	84	1	9.83e-06	3.39e-05	0.00017	0.00059	0.15737	0.01013	0.09296	0.00857	0.37849	0.02291	9.91205	1.5753	0.18994	0.02651	0.4906	2069.21	108.03	2741.63	250.2	24.5
9355-088.1	IP480-1	195.29	77.91	0.41215	0.01995	45	1	2.3e-05	0.00010569	0.0004	0.00183	0.10783	0.00814	0.05708	0.00736	0.21817	0.0202	3.40962	0.38097	0.11335	0.00589	0.887	1272.19	107.82	1853.76	97.08	31.4
9355-089.1	IP480-1	199.89	166.43	0.86012	0.0198	46	1	2.059e-05	8.957e-05	0.00036	0.00155	0.24078	0.01629	0.05573	0.00431	0.19909	0.00592	2.87061	0.11637	0.10458	0.00252	0.8076	1170.41	31.89	1706.87	45.03	31.4
9355-091.1	IP480-1	139.61	54.19	0.40097	0.0117	36	1	2.222e-05	7.797e-05	0.00039	0.00135	0.10519	0.00668	0.06363	0.00493	0.24257	0.00811	4.26462	0.19284	0.12751	0.00338	0.8129	1400.03	42.22	2063.94	47.56	32.2
9355-092.1	IP480-1	97.17	93.09	0.98962	0.02979	39	0	1e-05	1e-05	0.00017	0.00017	0.26696	0.00824	0.08826	0.00482	0.3272	0.01098	7.10097	0.28794	0.1574	0.00298	0.886	1824.8	53.55	2427.91	32.5	24.8
9355-095.1	IP480-1	116.71	89.54	0.79253	0.01831	40	1	3.26e-05	3.476e-05	0.00057	0.0006	0.235	0.00409	0.08778	0.00295	0.29604	0.00506	4.15983	0.09668	0.10191	0.0014	0.8088	1671.63	25.19	1659.24	25.73	-0.7
9355-096.1	IP480-1	99.81	38.83	0.40186	0.00868	50	0	4.52e-06	3.616e-05	8e-05	0.00063	0.1095	0.00269	0.12529	0.00466	0.45981	0.00814	10.589	0.22599	0.16702	0.00166	0.8872	2438.72	36.03	2528.02	16.76	3.5
9355-097.1	IP480-1	71.08	56.67	0.82358	0.02523	25	1	4.31e-05	7.201e-05	0.00075	0.00125	0.2253	0.00785	0.08431	0.00431	0.30819	0.00659	4.77978	0.15948	0.11248	0.00259	0.7277	1731.78	32.58	1839.94	42.36	5.9
9355-098.1	IP480-1	52.58	62.5	1.22797	0.02874	23	0	1.488e-05	0.00013237	0.00026	0.00229	0.32508	0.00826	0.09281	0.00363	0.35057	0.00639	6.08379	0.16821	0.12586	0.00234	0.7437	1937.34	30.58	2040.95	33.31	5.1
9355-100.1	IP480-1	336.27	68.86	0.21153	0.00455	109	1	1.031e-05	2.07e-05	0.00018	0.00036	0.06002	0.00171	0.09096	0.00353	0.32058	0.00491	5.05934	0.10024	0.11446	0.00123	0.8415	1792.55	24.03	1871.42	19.59	4.2
9355-101.1	IP480-1	108.77	47.64	0.45248	0.01221	41	0	1e-05	1e-05	0.00017	0.00017	0.11838	0.00311	0.09213	0.0038	0.35215	0.00592	6.17504	0.11797	0.12718	0.00091	0.9276	1944.87	28.3	2059.31	12.75	5.6
9355-103.1	IP480-1	41.88	53.83	1.32779	0.04427	13	0	1e-05	1e-05	0.00017	0.00017	0.36899	0.01383	0.06927	0.0039	0.24927	0.00636	3.52667	0.16792	0.10261	0.00381	0.6334	1434.72	32.9	1671.87	70.28	14.2
9355-104.1	IP480-1	41.12	48.31	1.21366	0.02857	13	1	0.0001312	0.00016024	0.00227	0.00278	0.32901	0.01183	0.06873	0.00327	0.25354	0.00513	3.52536	0.13198	0.10084	0.00293	0.6378	1456.73	26.45	1639.69	54.94	11.2
9355-106.1	IP480-1	35.36	45.56	1.33093	0.03999	14	0	1e-05	1e-05	0.00017	0.00017	0.33956	0.03133	0.07596	0.00822	0.29775	0.01423	7.59261	0.45018	0.18494	0.00548	0.8684	1680.13	71.07	2697.72	49.79	37.7
9355-107.1	IP480-1	465.3	204.47	0.45397	0.01023	138	5	4.523e-05	2.254e-05	0.00078	0.00039	0.11616	0.00697	0.07094	0.00487	0.27722	0.00679	4.95032	0.13595	0.12951	0.00126	0.936	1577.36	34.35	2091.33	17.23	24.6
9355-108.1	IP480-1	173.47	62.13	0.37	0.0095	43	6	0.00017722	0.00011887	0.00307	0.00206	0.08451	0.00674	0.05455	0.00532	0.23882	0.01192	3.78871	0.22591	0.11506	0.00311	0.8934	1380.58	62.31	1880.78	49.45	26.6
9355-109.1	IP480-2	155.5	71.19	0.47295	0.01052	60	2	4.193e-05	5.263e-05	0.00073	0.00091	0.13431	0.00937	0.10101	0.00756	0.35568	0.00541	6.06063	0.12185	0.12358	0.00141	0.8269	1961.68	25.76	2008.57	20.36	2.3
9355-110.1	IP480-2	171.62	152.71	0.91924	0.02021	73	1	2.806e-05	3.619e-05	0.00049	0.00063	0.26796	0.00742	0.10354	0.00401	0.35519	0.00565	5.96551	0.12016	0.12181	0.00128	0.855	1959.35	26.93	1982.9	18.86	1.2
9355-111.1	IP480-1	71.36	47.46	0.68714	0.01752	21	2	9.464e-05	6.941e-05	0.00164	0.0012	0.18314	0.00563	0.06983	0.00312	0.26199	0.00524	3.62078	0.095	0.10023	0.00147	0.8322	1500.02	26.82	1628.42	27.51	7.9
9355-111.1	IP480-2	64.27	62.04	0.99726	0.0235	22	2	0.00011337	0.00017832	0.00196	0.00309	0.29248	0.01688	0.08528	0.00549	0.29077	0.00466	4.03808	0.16852	0.10072	0.00369	0.4933	1645.36	23.29	1637.47	69.53	-0.5
9355-112.1	IP480-2	147.15	203.02	1.42536	0.03016	74	12	0.0002291	6.759e-05	0.00397	0.00117	0.22096	0.00714	0.06473	0.00293	0.41755	0.0098	9.98851	0.32796	0.1735	0.00351	0.7916	2249.33	44.7	2591.68	34.14	13.2
9355-113.1	IP480-2	234.87	99.84	0.43915	0.00953	90	11	0.00014547	4.358e-05	0.00252	0.00076	0.11044	0.00449	0.09078	0.00443	0.36099	0.00577	6.33653	0.12744	0.12731	0.00132	0.8594	1986.84	27.39	2061.15	18.4	3.6
9355-115.1	IP480-2	165.75	229.75	1.43193	0.0335	63	6	0.0001402	0.00010309	0.00243	0.00179	0.42816	0.02523	0.08696	0.00576	0.29082	0.00561	4.01283	0.12396	0.10008	0.00219	0.7127	1645.62	28.07	1625.49	41.18	-1.2
9355-116.1	IP480-2	177.38	47.09	0.27426	0.00692	60	1	1.84e-05	3.778e-05	0.00032	0.00065	0.08321	0.00316	0.09979	0.00478	0.3289	0.00487	5.20448	0.09536	0.11476	0.00105	0.8695	1833.06	23.64	1876.2	16.53	2.3
9355-117.1	IP480-2	88.47	38.31	0.44731	0.01229	49	2	4.217e-05	3.616e-05	0.00073	0.00063	0.12832	0.0106	0.14074	0.01249	0.4906	0.00831	12.3415	0.25567	0.18245	0.00182	0.8783	2573.25	36.06	2675.27	16.62	3.8
9355-118.1	IP480-2	47.99	29.97	0.6452	0.01649	24	3	0.00016609	0.00010725	0.00288	0.00186	0.19895	0.01086	0.13402	0.00846	0.43465	0.00818	8.76258	0.26855	0.14621	0.00321	0.7038	2326.66	36.87	2302.11	38.19	-1.1
9355-119.1	IP480-2	78.83	70.72	0.92675	0.02361	27	4	0.00018299	0.00025682	0.00317	0.00445	0.2548	0.01697	0.08016	0.00611	0.29155	0.00781	4.16708	0.23984	0.10366	0.00495	0.5688	1649.29	39.08	1690.66	90.69	2.4
9355-120.1	IP480-1	155.23	108.25	0.72042	0.06351	38	3	0.0001173	6.344e-05	0.00203	0.0011	0.19967	0.01443	0.06058	0.00709	0.21858	0.00576	3.07135	0.10681	0.10191	0.002	0.8281	1274.36	30.53	1659.22	36.83	23.2
9355-124.1	IP480-2	145.18	148.38	1.05586	0.02324	52	1	2.489e-05	6.519e-05	0.00043	0.00113	0.32199	0.01215	0.08959	0.00415	0.29379	0.00457	4.10668	0.0886	0.10138	0.00133	0.7966	1660.43	22.79	1649.55	24.57	-0.7
9355-125.1	IP480-2	79.4	65.28	0.84931	0.02549	30	5	0.0002309	0.00021506	0.004	0.00373	0.24943	0.01206	0.0946	0.00568	0.32211	0.00618	4.93415	0.21619	0.1111	0.00412	0.5436	1800.03	30.2	1817.45	68.86	1
9355-127.1	IP480-2	115.83	61.08	0.54476	0.01366	85	5	8.693e-05	7.052e-05	0.00151	0.00122	0.13798	0.00788	0.15557	0.00995	0.6142	0.00867	20.5369	0.72405	0.24251	0.00742	0.5087	3086.81	34.7	3136.49	49.48	1.6
9355-128.1	IP480-1	159.42	132.72	0.86001	0.0208	91	2	3.53e-05	1.72e-05	0.00061	0.0003	0.23973	0.00294	0.13017	0.00423	0.46696	0.00835	11.096	0.21458	0.17234	0.00094	0.9602	2470.2	36.81	2580.52	9.12	4.3
9355-129.1	IP480-1	78.35	93.99	1.23934	0.02663	26	0	1.986e-05	5.841e-05	0.00034	0.00101	0.34392	0.01592	0.07349	0.00396	0.26484	0.00459	3.69061	0.09719	0.10107	0.0018	0.7428	1514.54	23.44	1643.85	33.34	7.9
9355-130.1	IP480-1	103.69	60.17	0.59951	0.01508	78	0	5.16e-06	1.612e-05	9e-05	0.00028	0.15661	0.00313	0.16039	0.00613	0.61397	0.0127	21.946	0.89629	0.25924	0.00848	0.6067	3085.89	50.93	3242.1	52.54	4.8
9355-133.1	IP480-1	43.85	61.01	1.43732	0.03609	20	2	0.00012096	0.00011629	0.0021	0.00202	0.39626	0.01629	0.09841	0.00518	0.35695	0.00758	5.88186	0.2207	0.11951	0.00339	0.6605	1967.71	36.11	1948.91	51.64	-1
9355-134.1	IP480-1	62.03	20.18	0.33613	0.01109	22	1	4.023e-05	7.367e-05	0.0007	0.00128	0.0893	0.00516	0.09114	0.00627	0.34304	0.00601	5.43318	0.13524	0.11487	0.0018	0.7819	1901.27	28.89	1877.86	28.46	-1.2
9355-135.1	IP480-1	35.72	38.51	1.11364	0.02848	15	1	0.0001299	0.00011026	0.00225	0.00191	0.30081	0.01015	0.09145	0.00438	0.33855	0.00755	5.75335	0.21692	0.12325	0.00342	0.6832	1879.71	36.45	2003.82	50.11	6.2
9355-136.1	IP480-1	58.76	48.84	0.85873	0.01906	19	1	5.527e-05	9.93e-05	0.00096	0.00172	0.2432	0.00715	0.0798	0.00334	0.28178	0.00562	3.9694	0.11548	0.10217	0.00192	0.7668	1600.34	28.34	1663.85	35.25	3.8
9355-137.1	IP480-1	142.71	90.64	0.65612	0.01398	75	3	5.852e-05	3.131e-05	0.00101	0.00054	0.17628	0.00356	0.12227	0.00414	0.4551	0.0077	10.4398	0.20129	0.16637	0.00123	0.9253	2417.91	34.2	2521.47	12.43	4.1
9355-138.1	IP480-1	100.1	51.66	0.53316	0.01185	30	3	0.00014065	9.676e-05	0.00244	0.00168	0.13595	0.00958	0.0707	0.00535	0.27726	0.00458	3.82332	0.10574	0.10001	0.00202	0.6887	1577.53	23.16	1624.33	38.07	2.9
9355-138.2	IP480-1	101.27	69.14	0.70528	0.0165	32	13	0.00049834	0.00021555	0.00864	0.00374	0.18051	0.01015	0.07461	0.00482	0.29152	0.00631	3.8932	0.18075	0.09686	0.00372	0.5697	1649.1	31.57	1564.4	73.88	-5.4
9355-138.2.2	IP480-1	102.89	69.28	0.69562	0.01654	33	6	0.00022069	7.234e-05	0.00382	0.00125	0.16532	0.01231	0.07024	0.00596	0.29553	0.00978	4.1001	0.15785	0.10062	0.00161	0.9113	1669.1	48.84	1635.6	29.97	-2
9355-138.2.3	IP480-1	105.24	70.04	0.68756	0.02162	34	8	0.00031141	0.00010321	0.0054	0.00179	0.15875	0.01097	0.06815	0.00575	0.29515	0.01084	3.9738	0.18386	0.09765	0.00234	0.8585	1667.2	54.19	1579.7	45.42	-5.5
9355-139.1	IP480-1	239.98	134.99	0.58111	0.015	79	2	3.373e-05	4.348e-05	0.00058	0.00075	0.15772	0.01015	0.08041	0.00653	0.29625	0.01251	5.23352	0.35569	0.12812	0.00618	0.7102	1672.69	62.53	2072.4	87.52	19.3
9355-143.1	IP480-2	64.44	41.59	0.66685	0.03289	21	4	0.00023468	0.00015379	0.00407	0.00267	0.20653	0.01119	0.09004	0.00687	0.29072	0.00623	4.25563	0.17084	0.10617	0.00333	0.6314	1645.11	31.18	1734.62	58.69	5.2
9355-144.1	IP480-2	69.45	29.07	0.43238	0.01178	35	10	0.00035952	9.98e-05	0.00623	0.00173	0.11894	0.00621	0.12416	0.00761	0.45137	0.00763	10.184	0.25849	0.16364	0.00277	0.7491	2401.33	33.96	2493.62	28.83	3.7
9355-145.1	IP480-2	87.55	101.72	1.20026	0.06781	29	13	0.00067626	0.00037287	0.01172	0.00646	0.35067	0.01797	0.07625	0.00771	0.261	0.01735	3.5819	0.34375	0.09953	0.00611	0.7725	1494.94	89.29	1615.41	118.96	7.5
9355-147.1	IP480-2	387.29	295.89	0.78925	0.01772	159	11	8.974e-05	2.818e-05	0.00156	0.00049	0.21458	0.0037	0.09719	0.00305	0.35749	0.00483	5.89973	0.10383	0.11969	0.00116	0.8366	1970.25	22.97	1951.65	17.46	-1
9355-149.1	IP480-2	231.47	166.85	0.74464	0.0183	122	9	0.00010311	3.744e-05	0.00179	0.00065	0.20366	0.00405	0.12346	0.00437	0.4514	0.00718	9.50773	0.18273	0.15276	0.00137	0.8861	2401.46	31.97	2377.08	15.38	-1
9355-150.1	IP480-2	89.08	140.26	1.62661	0.03761	42	2	8.423e-05	0.00016973	0.00146	0.00294	0.44889	0.0222	0.09613	0.00552	0.34833	0.00622	5.69876	0.21894	0.11866	0.00378	0.5685	1926.62	29.81	1936.08	58.14	0.5
9355-151.1	IP480-2	321.49	224.7	0.72204	0.01738	148	4	3.639e-05	5.279e-05	0.00063	0.00091	0.14452	0.00325	0.08204	0.00293	0.40989	0.00564	8.93869	0.17018	0.15816	0.00183	0.798	2214.41	25.82	2436.12	19.73	9.1
9355-152.1	IP480-2	293.09	165.3	0.58265	0.01328	113	3	3.335e-05	4.548e-05	0.00058	0.00079	0.1588	0.00464	0.09538	0.00381	0.34995	0.00521	5.89707	0.10616	0.12222	0.00103	0.885	1934.35	24.91	1988.84	15.11	2.7
9355-154.1	IP480-2	39.4	55.82	1.46363	0.03567	18	0	2.828e-05	0.00021626	0.00049	0.00375	0.43673	0.0227	0.10195	0.00634	0.34166	0.00817	5.48694	0.26473	0.11647	0.00455	0.5966	1894.67	39.36	1902.81	71.84	0.4
9355-155.1	IP480-2	167.33	47.93	0.29587	0.01019	72	2	3.364e-05	3.959e-05	0.00058	0.00069	0.08942	0.00424	0.12321	0.00746	0.40767	0.00631	7.73927	0.14853	0.13769	0.00132	0.8684	2204.27	28.94	2198.29	16.76	-0.3
9355-156.1	IP480-2	54.38	27.08	0.51444	0.01311	24	2	0.00010228	0.00030453	0.00177	0.00528	0.14558	0.01595	0.11358	0.01292	0.40136	0.00692	7.55571	0.34929	0.13653	0.00557	0.4832	2175.32	31.91	2183.67	72.76	0.4
9355-157.1	IP480-2	50.4	58.2	1.19305	0.083	28	0	4.45e-06	6.622e-05	8e-05	0.00115	0.34462	0.02508	0.12549	0.0128	0.43445	0.00709	8.44929	0.20184	0.14105	0.00219	0.7645	2325.73	31.95	2240.18	27.09	-3.8
9355-159.1	IP480-2	215.21	207.6	0.99653	0.02108	109	6	8.324e-05	4.61e-05	0.00144	0.0008	0.27752	0.00559	0.11287	0.00383	0.40528	0.007	9.48264	0.19866	0.16969	0.00168	0.8837	2193.33	32.2	2554.63	16.64	14.1
07RAT-4
9356-00111	IP480-2	34.02	59.46	1.80554	0.04983	25	1	6.474e-05	0.0002199	0.00112	0.00381	0.54217	0.02005	0.14848	0.00797	0.49448	0.01359	12.1221	0.53492	0.1778	0.00556	0.7112	2590.01	58.87	2632.46	52.92	1.6
9356-002.1	IP480-1	71.17	78.71	1.14253	0.02967	28	2	9.438e-05	8.767e-05	0.00164	0.00152	0.32595	0.0097	0.09101	0.00401	0.31899	0.00622	5.14674	0.18931	0.11702	0.00338	0.6282	1784.82	30.47	1911.15	52.71	6.6
9356-003.1	IP480-1	99.27	60.46	0.62917	0.01517	59	10	0.00023166	0.00010485	0.00401	0.00182	0.18116	0.00889	0.14511	0.00834	0.50397	0.00899	12.8282	0.32928	0.18461	0.00302	0.7746	2630.85	38.65	2694.73	27.29	2.4
9356-004.1	IP480-1	37.14	37.55	1.04435	0.02799	23	4	0.00026431	0.00032616	0.00458	0.00565	0.28712	0.01617	0.136	0.00899	0.49468	0.01088	12.3404	0.53806	0.18093	0.00633	0.6048	2590.88	47.1	2661.39	59.2	2.6
9356-006.1	IP480-1	130.42	74.83	0.59272	0.0159	76	18	0.00030921	0.00010623	0.00536	0.00184	0.15477	0.00568	0.13251	0.00663	0.50749	0.01059	12.8863	0.36933	0.18416	0.00317	0.803	2645.9	45.43	2690.71	28.74	1.7
9356-007.1	IP480-1	115.83	53.88	0.48052	0.01118	52	5	0.00013032	4.449e-05	0.00226	0.00077	0.12343	0.02639	0.10381	0.0224	0.40414	0.00686	9.2884	0.20805	0.16669	0.00211	0.8285	2188.07	31.58	2524.67	21.39	13.3
9356-008.1	IP480-1	50.99	19.65	0.39817	0.0138	29	4	0.0001892	0.00010673	0.00328	0.00185	0.10068	0.00638	0.13133	0.00996	0.5194	0.012	13.7317	0.42472	0.19174	0.00343	0.8194	2696.64	51.13	2757.18	29.65	2.2
9356-009.1	IP480-1	31.04	54.4	1.8107	0.04996	21	9	0.00069953	0.00020471	0.01212	0.00355	0.46037	0.02073	0.12284	0.00692	0.48314	0.00948	11.2448	0.3805	0.1688	0.00426	0.673	2540.92	41.33	2545.8	42.9	0.2
9356-010.1	IP480-1	164.97	268.83	1.68348	0.03602	104	25	0.00039412	7.162e-05	0.00683	0.00124	0.47506	0.00763	0.12587	0.00404	0.44606	0.00791	10.4801	0.26161	0.1704	0.00264	0.7878	2377.71	35.35	2561.58	26.17	7.2
9356-012.1	IP480-1	197.28	68.38	0.35808	0.00787	100	7	8.474e-05	0.00016746	0.00147	0.0029	0.09564	0.0069	0.12296	0.00956	0.46036	0.00871	11.534	0.31435	0.18171	0.00316	0.7736	2441.16	38.54	2668.53	29.12	8.5
9356-013.1	IP480-1	84.93	49.37	0.60059	0.01413	41	1	3.158e-05	7.436e-05	0.00055	0.00129	0.17186	0.00652	0.11911	0.00574	0.41623	0.00759	9.48665	0.24955	0.1653	0.00278	0.7731	2243.36	34.64	2510.61	28.56	10.6
9356-014.1	IP480-1	63.49	36.22	0.5894	0.01449	37	4	0.00016288	0.00019044	0.00282	0.0033	0.17121	0.00888	0.14366	0.00883	0.49455	0.01087	12.8523	0.46596	0.18848	0.00494	0.6966	2590.35	47.06	2728.94	43.83	5.1
9356-016.1	IP480-1	83.87	91.68	1.12922	0.02572	55	2	4.826e-05	6.477e-05	0.00084	0.00112	0.30407	0.01208	0.13697	0.0067	0.50867	0.00871	13.1955	0.28411	0.18814	0.00208	0.86	2650.93	37.34	2726.01	18.36	2.8
9356-017.1	IP480-1	49.71	54.3	1.12837	0.02773	31	3	0.00013511	7.923e-05	0.00234	0.00137	0.30008	0.01498	0.12971	0.00761	0.48775	0.00905	11.8692	0.32184	0.17649	0.0031	0.7656	2560.91	39.35	2620.19	29.55	2.3
9356-018.1	IP480-1	160.43	78.01	0.50231	0.01182	85	3	5.071e-05	0.00010783	0.00088	0.00187	0.1338	0.00865	0.12604	0.01092	0.47321	0.02488	10.5821	0.83937	0.16219	0.00863	0.7466	2497.63	109.79	2478.58	92.63	-0.8
9356-019.1	IP480-1	93.85	48.57	0.53458	0.01305	49	4	9.613e-05	4.484e-05	0.00167	0.00078	0.13525	0.00571	0.11807	0.0061	0.4667	0.00788	10.5229	0.22685	0.16353	0.00188	0.8493	2469.06	34.71	2492.49	19.46	0.9
9356-020.1	IP480-1	138.16	142.06	1.06218	0.02329	89	4	6.678e-05	6.781e-05	0.00116	0.00118	0.29825	0.01058	0.14004	0.00647	0.49872	0.00995	13.8567	0.34374	0.20151	0.00251	0.8668	2608.29	42.93	2838.48	20.47	8.1
9356-021.1	IP480-1	138	146.99	1.10034	0.02574	87	3	5.131e-05	2.603e-05	0.00089	0.00045	0.30495	0.00631	0.1346	0.00533	0.48565	0.01185	13.5237	0.36423	0.20196	0.00177	0.9465	2551.83	51.62	2842.12	14.35	10.2
9356-022.1	IP480-1	74.93	60.85	0.83897	0.17697	38	3	0.00011137	7.174e-05	0.00193	0.00124	0.22813	0.00696	0.11276	0.02422	0.4147	0.01085	10.0095	0.30266	0.17506	0.00214	0.9161	2236.36	49.65	2606.58	20.51	14.2
9356-023.1	IP480-1	131.56	123.66	0.97106	0.02131	81	5	8.127e-05	2.943e-05	0.00141	0.00051	0.25965	0.00666	0.13277	0.00506	0.49652	0.00878	12.7861	0.28919	0.18677	0.00225	0.8484	2598.83	37.92	2713.89	20.04	4.2
9356-024.1	IP480-1	61.31	47.04	0.79265	0.02177	34	0	1e-05	1e-05	0.00017	0.00017	0.21205	0.01331	0.12528	0.00902	0.4683	0.01039	11.0442	0.27893	0.17104	0.00165	0.9258	2476.12	45.76	2567.88	16.18	3.6
9356-025.1	IP480-1	120.85	91.49	0.78206	0.0194	72	5	9.947e-05	7.763e-05	0.00172	0.00135	0.21245	0.00614	0.13555	0.00566	0.49896	0.00859	12.6033	0.28189	0.1832	0.00225	0.8384	2609.32	37.05	2682.03	20.46	2.7
9356-026.1	IP480-1	70.14	94.1	1.38595	0.03277	40	6	0.00024801	0.0001397	0.0043	0.00242	0.36551	0.01064	0.11375	0.00479	0.43132	0.00829	9.75975	0.27156	0.16411	0.00293	0.771	2311.68	37.45	2498.45	30.38	7.5
9356-027.1	IP480-1	47.55	36.21	0.78684	0.02859	25	0	1e-05	1e-05	0.00017	0.00017	0.19809	0.00964	0.11167	0.00721	0.44355	0.00974	11.4253	0.32916	0.18682	0.00301	0.8323	2366.5	43.65	2714.38	26.79	12.8
9356-028.1	IP480-1	166.33	51.43	0.31942	0.0109	76	2	4.007e-05	3.752e-05	0.00069	0.00065	0.08287	0.00396	0.11072	0.00696	0.42679	0.00957	9.82751	0.2918	0.167	0.00282	0.8261	2291.22	43.38	2527.85	28.59	9.4
9356-029.1	IP480-1	86.6	81.44	0.97151	0.02412	44	1	2.092e-05	4.298e-05	0.00036	0.00074	0.25166	0.0081	0.1081	0.00524	0.41732	0.01102	9.59408	0.32473	0.16674	0.00302	0.847	2248.29	50.31	2525.17	30.78	11
9356-030.1	IP480-1	78.89	47.94	0.6277	0.02052	37	9	0.00030787	0.00018036	0.00534	0.00313	0.1555	0.01842	0.10105	0.01274	0.40791	0.01152	10.1547	0.47041	0.18055	0.00602	0.6999	2205.38	52.98	2657.93	56.38	17
9356-031.1	IP480-1	125.13	116.7	0.96343	0.0236	53	4	0.00010643	9.87e-05	0.00184	0.00171	0.2743	0.01043	0.09963	0.00499	0.34994	0.00753	6.84271	0.20281	0.14182	0.00253	0.8013	1934.31	36.05	2249.54	31.21	14
9356-032.1	IP480-1	149.27	57.42	0.39741	0.00945	58	2	4.523e-05	5.997e-05	0.00078	0.00104	0.11898	0.00486	0.10744	0.00593	0.35886	0.01024	6.69413	0.27853	0.13529	0.00364	0.7669	1976.78	48.78	2167.75	47.68	8.8
9356-032.2	IP480-2	233.65	90.9	0.40189	0.00917	91	19	0.00025999	5.682e-05	0.00451	0.00098	0.11543	0.00408	0.10383	0.00475	0.36151	0.00646	6.94943	0.18863	0.13942	0.00256	0.7425	1989.3	30.65	2220.05	32.11	10.4
9356-033.2	IP480-2	61.93	49.46	0.82508	0.0229	35	0	1.05e-06	5.644e-05	2e-05	0.00098	0.22195	0.01984	0.12724	0.0122	0.47302	0.00982	10.9156	0.27292	0.16736	0.00194	0.8882	2496.81	43.12	2531.45	19.56	1.4
9356-034.1	IP480-2	44.82	14.87	0.34274	0.01483	20	7	0.00045347	0.0002234	0.00786	0.00387	0.08552	0.0162	0.10454	0.02043	0.41899	0.00874	8.36684	0.32165	0.14483	0.00431	0.6397	2255.89	39.85	2285.75	52.17	1.3
9356-035.1	IP480-2	87.76	62.79	0.73919	0.01728	53	4	9.984e-05	7.701e-05	0.00173	0.00133	0.20528	0.00655	0.14017	0.00651	0.50472	0.01231	12.7604	0.35389	0.18336	0.00193	0.9265	2634.04	52.94	2683.54	17.5	1.8
9356-036.1	IP480-2	84.28	67.24	0.82416	0.01977	32	0	2.006e-05	0.00023829	0.00035	0.00413	0.25241	0.01733	0.09903	0.00743	0.32336	0.00594	5.08457	0.21487	0.11404	0.00409	0.5404	1806.12	28.98	1864.81	66.14	3.1
9356-037.1	IP480-2	286.88	123.92	0.44625	0.01047	142	13	0.00011821	3.642e-05	0.00205	0.00063	0.12556	0.00303	0.12565	0.00457	0.44657	0.00613	9.80301	0.15409	0.15921	0.00098	0.9218	2379.99	27.37	2447.28	10.43	2.7
9356-038.1	IP480-2	87.99	38.22	0.44875	0.01215	42	8	0.00023435	0.00010543	0.00406	0.00183	0.11208	0.00654	0.11065	0.00751	0.44301	0.00959	9.01826	0.25581	0.14764	0.00234	0.8328	2364.1	42.98	2318.78	27.4	-2
9356-039.1	IP480-2	93.27	59.51	0.65916	0.01796	48	4	0.00010805	0.000152	0.00187	0.00263	0.18686	0.01763	0.12512	0.01255	0.44137	0.00903	9.96163	0.30402	0.16369	0.00331	0.7532	2356.76	40.51	2494.16	34.49	5.5
9356-040.1	IP480-2	225.97	212.6	0.97196	0.02132	146	6	6.032e-05	2.686e-05	0.00105	0.00047	0.26529	0.00846	0.14064	0.00588	0.51529	0.00812	13.3433	0.26456	0.18781	0.00192	0.8592	2679.17	34.64	2723.05	16.95	1.6
9356-041.1	IP480-2	32.43	38.91	1.23935	0.03703	21	3	0.00019322	0.00053036	0.00335	0.00919	0.34843	0.0266	0.13712	0.01161	0.48773	0.01033	11.6398	0.6829	0.17309	0.00902	0.4719	2560.86	44.9	2587.72	89.75	1
9356-042.1	IP480-2	83.84	123.19	1.51799	0.03405	59	5	0.00013506	0.00015631	0.00234	0.00271	0.43585	0.0114	0.14585	0.00578	0.50799	0.00994	12.8691	0.36871	0.18374	0.00342	0.7645	2648.02	42.65	2686.9	31.11	1.4
9356-043.1	IP480-2	135.89	64.03	0.48679	0.01532	71	3	5.479e-05	5.507e-05	0.00095	0.00095	0.12415	0.0063	0.11957	0.0075	0.46882	0.00892	10.6616	0.27003	0.16494	0.00239	0.8229	2478.38	39.27	2506.89	24.61	1.1
9356-044.1	IP480-2	53.26	107.63	2.08767	0.04948	42	5	0.00019044	0.00022218	0.0033	0.00385	0.58392	0.0164	0.14567	0.00617	0.5208	0.01096	13.1679	0.44667	0.18338	0.00442	0.7093	2702.59	46.63	2683.64	40.42	-0.7
9356-045.1	IP480-2	152.27	126.68	0.85945	0.02041	58	2	3.612e-05	0.00018954	0.00063	0.00328	0.23978	0.01351	0.09094	0.00574	0.32596	0.00511	4.97685	0.18905	0.11073	0.00362	0.5202	1818.79	24.89	1811.51	60.62	-0.4
9356-046.1	IP480-2	71.56	34.5	0.49806	0.01256	42	6	0.0001912	8.134e-05	0.00331	0.00141	0.1383	0.00843	0.14247	0.01143	0.51309	0.02346	13.1138	0.90858	0.18537	0.00865	0.7441	2669.8	100.73	2701.5	79.16	1.2
9356-048.1	IP480-2	146.25	189.32	1.33731	0.03151	103	5	7.59e-05	7.005e-05	0.00132	0.00121	0.37981	0.00679	0.14823	0.00492	0.52192	0.00787	13.3948	0.25612	0.18613	0.00186	0.8542	2707.34	33.43	2708.3	16.63	0
9356-049.1	IP480-2	61.13	38.97	0.65852	0.01691	35	2	6.017e-05	5.907e-05	0.00104	0.00102	0.19036	0.00798	0.1409	0.00774	0.48744	0.01194	11.4957	0.3984	0.17105	0.0037	0.785	2559.59	51.96	2567.9	36.65	0.3
9356-050.1	IP480-2	111.9	26	0.24008	0.00709	64	1	1e-05	1e-05	0.00017	0.00017	0.07108	0.00328	0.15629	0.00886	0.52788	0.00753	13.5962	0.2271	0.1868	0.00132	0.9071	2732.49	31.85	2714.23	11.73	-0.7
9356-051.1	IP480-2	59.57	45.43	0.78781	0.02283	36	3	0.00012788	0.00017373	0.00222	0.00301	0.23413	0.01029	0.14874	0.00816	0.50049	0.00771	12.7863	0.42305	0.18529	0.00508	0.5694	2615.9	33.23	2700.78	45.99	3.1
9356-052.1	IP480-2	79.77	84.31	1.09185	0.03176	53	3	7.975e-05	4.204e-05	0.00138	0.00073	0.30048	0.0141	0.14358	0.00836	0.52171	0.00967	13.5837	0.36357	0.18884	0.00323	0.7728	2706.44	41.12	2732.05	28.47	0.9
9356-053.1	IP480-2	117.77	127.81	1.12114	0.0279	77	7	0.00014489	4.71e-05	0.00251	0.00082	0.3197	0.00648	0.14342	0.00517	0.50296	0.00826	12.9236	0.25473	0.18636	0.00169	0.8903	2626.52	35.51	2710.27	15	3.1
9356-054.1	IP480-2	48.61	39.56	0.84064	0.03179	28	2	7.926e-05	0.00012328	0.00137	0.00214	0.2404	0.01276	0.13416	0.01027	0.46913	0.01882	10.6426	0.67105	0.16453	0.00722	0.7232	2479.74	83.11	2502.79	75.82	0.9
9356-055.1	IP480-2	105.63	82.29	0.80476	0.02038	64	2	3.764e-05	3.254e-05	0.00065	0.00056	0.22368	0.006	0.139	0.0057	0.50009	0.009	12.2248	0.28643	0.17729	0.00229	0.8371	2614.17	38.8	2627.72	21.64	0.5
9356-056.1	IP480-2	57.4	37.38	0.6728	0.01996	32	0	6.9e-06	8.146e-05	0.00012	0.00141	0.19751	0.00804	0.139	0.00751	0.47349	0.00927	11.2321	0.31622	0.17205	0.00308	0.7752	2498.85	40.7	2577.66	30.26	3.1
9356-057.1	IP480-2	227.56	151.05	0.68574	0.01468	84	1	1e-05	1e-05	0.00017	0.00017	0.19596	0.00424	0.09343	0.00313	0.32696	0.00458	5.01997	0.08918	0.11135	0.00104	0.8546	1823.62	22.3	1821.64	16.97	-0.1
9356-059.1	IP480-2	92.22	116.23	1.30205	0.0409	62	2	5.427e-05	0.00010168	0.00094	0.00176	0.37348	0.00884	0.14386	0.0063	0.50155	0.00964	12.4953	0.30798	0.18069	0.00239	0.8469	2620.45	41.53	2659.21	22.06	1.5
9356-060.1	IP480-1	47.07	7.28	0.15976	0.01688	17	4	0.00025334	0.00040063	0.00439	0.00694	0.05902	0.03014	0.12759	0.06676	0.34537	0.01473	6.37915	0.58411	0.13396	0.01016	0.5693	1912.46	70.96	2150.52	138.88	11.1
9356-063.1	IP480-1	103.13	104.83	1.05002	0.03628	51	4	0.00012059	0.00019172	0.00209	0.00332	0.2907	0.0233	0.10854	0.01018	0.39205	0.01343	9.71728	0.47605	0.17976	0.00557	0.7782	2132.34	62.47	2650.69	52.39	19.6
9356-065.1	IP480-1	89.23	77.13	0.89294	0.02309	49	3	9.985e-05	0.00010461	0.00173	0.00181	0.22424	0.02209	0.11397	0.01181	0.45385	0.00864	11.747	0.30268	0.18772	0.00284	0.8122	2412.32	38.42	2722.32	25.19	11.4
9356-066.1	IP480-1	58.77	83.68	1.47088	0.03906	35	5	0.00023499	0.00025303	0.00407	0.00439	0.37962	0.01466	0.11302	0.00589	0.43792	0.01001	11.1207	0.42113	0.18418	0.00506	0.6945	2341.3	45.06	2690.86	46.11	13
9356-067.1	IP480-1	77.42	74.97	1.00043	0.18642	29	0	1e-05	1e-05	0.00017	0.00017	0.24892	0.01615	0.07585	0.0154	0.30485	0.01455	6.90638	0.44152	0.16431	0.00607	0.8191	1715.33	72.3	2500.48	63.6	31.4
9356-068.1	IP480-1	165.08	56.5	0.35356	0.00936	66	10	0.00019615	0.00015659	0.0034	0.00271	0.08875	0.0066	0.09368	0.00766	0.37322	0.00785	8.44987	0.30071	0.16421	0.0043	0.6834	2044.52	36.98	2499.44	44.77	18.2
9356-070.1	IP480-1	67.97	38.52	0.58553	0.03388	25	0	1e-05	1e-05	0.00017	0.00017	0.17027	0.02518	0.09231	0.01827	0.31746	0.03748	8.54942	1.48689	0.19532	0.02222	0.7607	1777.32	186.07	2787.48	199.68	36.2
9356-071.1	IP480-1	80.34	98.17	1.26231	0.09326	31	2	0.00011617	0.00033381	0.00201	0.00579	0.30108	0.02509	0.07287	0.00843	0.30551	0.00963	6.78387	0.39506	0.16105	0.00728	0.6381	1718.56	47.71	2466.69	78.42	30.3
9356-072.1	IP480-1	125.54	67.07	0.55188	0.02247	41	0	1e-05	1e-05	0.00017	0.00017	0.14966	0.01669	0.07911	0.01035	0.29174	0.01604	6.68382	0.51517	0.16616	0.0079	0.7906	1650.2	80.56	2519.36	82.22	34.5
9356-074.1	IP480-1	92.86	73.49	0.81759	0.04568	30	5	0.00021045	0.00033506	0.00365	0.00581	0.20696	0.02732	0.07015	0.01465	0.27713	0.04209	5.69672	0.9925	0.14909	0.0102	0.9209	1576.89	216.06	2335.49	122.13	32.5
9356-075.1	IP480-1	188.07	222.54	1.22242	0.27296	78	2	4.121e-05	0.00017418	0.00071	0.00302	0.27253	0.01719	0.07504	0.01772	0.3366	0.0148	7.5903	0.46848	0.16355	0.00624	0.7895	1870.27	71.76	2492.69	65.79	25
9356-076.1	IP480-1	105.67	56.47	0.55206	0.01799	39	13	0.00044191	0.00076925	0.00766	0.01333	0.12454	0.03492	0.07512	0.02152	0.333	0.01634	7.49796	0.76518	0.1633	0.01365	0.583	1852.92	79.49	2490.15	148.15	25.6
9356-077.1	IP480-1	167.93	143.4	0.88215	0.03532	67	13	0.00026342	0.00021835	0.00457	0.00378	0.21554	0.01943	0.08148	0.00855	0.33347	0.0119	7.90001	0.36695	0.17182	0.0044	0.8369	1855.2	57.77	2575.42	43.46	28
9356-078.1	IP480-1	185.97	298.27	1.65693	0.08	85	2	4.9e-05	0.00032566	0.00085	0.00564	0.47134	0.03543	0.09092	0.00892	0.31962	0.01298	7.85697	0.45065	0.17829	0.00637	0.7861	1787.85	63.74	2637.03	60.61	32.2
9356-079.1	IP480-1	253.26	283.88	1.15798	0.03632	107	6	8.309e-05	0.00011443	0.00144	0.00198	0.29148	0.01269	0.08383	0.00553	0.33302	0.01279	8.5165	0.40612	0.18547	0.00442	0.8682	1853.02	62.17	2702.44	39.92	31.4
9356-081.1	IP480-1	158.12	52.6	0.34365	0.01408	64	1	1e-05	1e-05	0.00017	0.00017	0.10072	0.01038	0.10878	0.01275	0.37117	0.01399	8.93683	0.49318	0.17463	0.00626	0.7644	2034.89	66.12	2602.49	61.04	21.8
9356-082.1	IP480-1	71.73	48.32	0.69593	0.17523	28	58	0.00248027	0.00121235	0.04299	0.02101	0.08516	0.05581	0.04483	0.03783	0.3664	0.17155	8.23952	4.1312	0.1631	0.02123	0.9663	2012.43	864.84	2488.03	237.88	19.1
9356-083.1	IP480-1	119.23	47.91	0.41512	0.01576	46	1	3.121e-05	0.00030663	0.00054	0.00531	0.11103	0.01527	0.09268	0.01363	0.34652	0.01231	8.23037	0.48025	0.17226	0.00725	0.6989	1917.95	59.21	2579.76	72.02	25.7
9356-084.1	IP480-1	89.56	106.63	1.23003	0.07957	60	0	1e-05	1e-05	0.00017	0.00017	0.30635	0.02628	0.1326	0.06415	0.53241	0.25115	10.7609	5.23076	0.14659	0.01061	0.989	2751.6	1153.87	2306.51	129.86	-19.3
9356-085.1	IP480-1	189.35	66.75	0.36417	0.02094	81	5	7.865e-05	0.00010798	0.00136	0.00187	0.1003	0.00857	0.10785	0.01181	0.39159	0.0146	9.44968	0.41498	0.17502	0.00333	0.9029	2130.2	67.97	2606.22	32.05	18.3
9356-086.1	IP480-1	178.24	321.79	1.86509	0.04827	99	8	0.00013931	0.00011967	0.00241	0.00207	0.47893	0.02629	0.09996	0.00661	0.38926	0.01025	9.19359	0.32461	0.17129	0.00351	0.818	2119.4	47.72	2570.33	34.64	17.5
9356-088.1	IP480-1	131.17	47.71	0.37577	0.02398	43	15	0.00043937	0.0002799	0.00761	0.00485	0.09974	0.02974	0.08105	0.02501	0.30538	0.01436	5.89356	0.40809	0.13997	0.00634	0.7608	1717.92	71.29	2226.85	80.63	22.9
9356-089.1	IP480-1	106.46	39.54	0.38372	0.00996	47	1	1.75e-05	7.949e-05	0.0003	0.00138	0.10825	0.00549	0.11377	0.00722	0.40327	0.01122	9.5012	0.34647	0.17088	0.00348	0.8329	2184.08	51.77	2566.24	34.42	14.9
9356-090.1	IP480-1	144.93	94.51	0.67362	0.0213	70	8	0.00016113	6.172e-05	0.00279	0.00107	0.16961	0.00564	0.10391	0.00537	0.41267	0.00977	10.6944	0.28825	0.18795	0.00193	0.9258	2227.14	44.72	2724.33	17.02	18.3
9356-091.1	IP480-1	52.93	48.66	0.94966	0.02925	27	0	2.043e-05	0.00021363	0.00035	0.0037	0.23508	0.01257	0.10589	0.00741	0.42778	0.01408	9.82532	0.47791	0.16658	0.00532	0.7588	2295.68	63.9	2523.6	54.64	9
9356-092.1	IP480-1	62.29	59.56	0.98792	0.04843	30	6	0.00026543	0.00014123	0.0046	0.00245	0.23839	0.02098	0.09606	0.01002	0.39809	0.01081	8.69682	0.34861	0.15844	0.00417	0.7592	2160.26	50.02	2439.11	45.24	11.4
9356-093.1	IP480-1	86.16	146.28	1.75399	0.19467	45	2	6.744e-05	0.00013884	0.00117	0.00241	0.4414	0.02245	0.0929	0.01157	0.36917	0.00913	9.41542	0.36957	0.18497	0.0051	0.7176	2025.49	43.12	2697.99	46.24	24.9
9356-112.1	IP480-2	109.18	129.86	1.22871	0.02882	45	10	0.00032332	0.0001174	0.0056	0.00203	0.35319	0.01	0.09487	0.00396	0.33005	0.00653	5.04331	0.16012	0.11082	0.00249	0.7119	1838.64	31.74	1812.96	41.39	-1.4
9356-113.1	IP480-2	128.7	50.92	0.40878	0.01279	68	4	6.892e-05	7.691e-05	0.00119	0.00133	0.11838	0.01232	0.13909	0.01528	0.48027	0.00783	10.9422	0.22626	0.16524	0.00179	0.8542	2528.45	34.2	2510.01	18.34	-0.7
9356-114.1	IP480-2	164.19	70.69	0.44478	0.01116	93	11	0.00015227	4.855e-05	0.00264	0.00084	0.11856	0.00367	0.13538	0.00583	0.5079	0.00824	12.2423	0.24397	0.17482	0.0017	0.8754	2647.68	35.34	2604.29	16.27	-1.7
9356-116.1	IP480-2	29.39	24.72	0.86895	0.0324	11	3	0.00034513	0.00048943	0.00598	0.00848	0.26021	0.02314	0.09801	0.00967	0.3273	0.00684	5.3441	0.39572	0.11842	0.00811	0.3978	1825.29	33.3	1932.52	127.98	5.5
9356-117.1	IP480-2	93.15	174.95	1.94027	0.04775	71	5	0.00011295	4.632e-05	0.00196	0.0008	0.54266	0.01744	0.14244	0.00621	0.50929	0.00821	13.0206	0.24803	0.18542	0.00154	0.901	2653.6	35.17	2701.98	13.81	1.8
9356-118.1	IP480-2	150.36	131.53	0.90369	0.01966	95	1	1.296e-05	3.48e-05	0.00022	0.0006	0.24774	0.00583	0.14116	0.00518	0.5149	0.00915	13.0314	0.2703	0.18356	0.0016	0.9095	2677.52	39.07	2685.26	14.44	0.3
9356-120.1	IP480-2	60.75	32.83	0.55829	0.01449	31	3	0.00010808	6.171e-05	0.00187	0.00107	0.15487	0.00704	0.12587	0.00706	0.45373	0.00916	10.2788	0.25472	0.1643	0.00198	0.8753	2411.82	40.73	2500.41	20.48	3.5
9356-121.1	IP480-2	63.48	49.91	0.8122	0.02222	24	6	0.00035428	0.00028206	0.00614	0.00489	0.23209	0.01421	0.09445	0.00657	0.33051	0.00612	5.2276	0.24727	0.11471	0.00473	0.5005	1840.84	29.72	1875.41	76.34	1.8
9356-122.1	IP480-2	176.05	103.5	0.60735	0.01451	98	3	4.272e-05	2.712e-05	0.00074	0.00047	0.16291	0.00795	0.13012	0.00746	0.48512	0.00885	11.5205	0.25684	0.17223	0.00185	0.8786	2549.54	38.54	2579.47	18.03	1.2
07RAT-17
9357-001.1	IP480-1	87.93	70.38	0.82682	0.01987	53	3	7.706e-05	4.295e-05	0.00134	0.00074	0.21134	0.00804	0.12688	0.00649	0.4964	0.01205	12.8029	0.37857	0.18706	0.00264	0.8804	2598.3	52.1	2716.47	23.49	4.3
9357-002.1	IP480-1	152.1	108.63	0.73778	0.01715	92	0	4e-06	3.991e-05	7e-05	0.00069	0.20326	0.00931	0.13944	0.00755	0.50613	0.00866	12.9248	0.25694	0.18521	0.00152	0.9125	2640.07	37.18	2700.08	13.6	2.2
9357-003.1	IP480-1	89.27	68.98	0.79834	0.02079	51	5	0.00013016	6.901e-05	0.00226	0.0012	0.20812	0.00532	0.12622	0.00534	0.48419	0.01035	11.7163	0.32493	0.1755	0.00267	0.8393	2545.49	45.11	2610.78	25.53	2.5
9357-004.1	IP480-1	126.42	95.45	0.77994	0.02038	53	3	6.602e-05	7.096e-05	0.00114	0.00123	0.22321	0.012	0.10313	0.00647	0.36034	0.00687	6.09586	0.1733	0.12269	0.00231	0.7535	1983.78	32.64	1995.76	33.87	0.6
9357-005.1	IP480-1	117.14	83.58	0.73709	0.01745	73	0	2.24e-06	2.707e-05	4e-05	0.00047	0.19236	0.00416	0.13656	0.00512	0.52329	0.01014	13.718	0.33888	0.19013	0.00249	0.8507	2713.11	43.06	2743.28	21.69	1.1
9357-006.1	IP480-1	58.37	55.52	0.98262	0.02371	35	4	0.00015717	0.000123	0.00272	0.00213	0.25278	0.01135	0.12512	0.00685	0.48636	0.0097	12.3496	0.34726	0.18416	0.00322	0.7868	2554.91	42.2	2690.68	29.2	5
9357-008.1	IP480-1	49.76	67.13	1.39355	0.03796	30	2	9.599e-05	0.00010898	0.00166	0.00189	0.38418	0.02183	0.12458	0.00834	0.45191	0.01025	10.0014	0.37496	0.16051	0.00436	0.6953	2403.73	45.65	2461.07	46.64	2.3
9357-010.1	IP480-1	70.15	32.14	0.47329	0.01204	27	5	0.00024376	7.607e-05	0.00422	0.00132	0.11593	0.00616	0.0877	0.00552	0.35806	0.00785	6.14777	0.21566	0.12453	0.00309	0.7132	1972.97	37.37	2022.07	44.58	2.4
9357-011.1	IP480-1	134.49	120.55	0.92593	0.021	57	3	7.401e-05	3.939e-05	0.00128	0.00068	0.25635	0.00505	0.09893	0.00338	0.35732	0.00585	5.9882	0.13563	0.12154	0.00167	0.7987	1969.47	27.84	1979.02	24.67	0.5
9357-012.1	IP480-1	50.35	56.77	1.1648	0.02748	33	2	7.725e-05	0.00012642	0.00134	0.00219	0.31959	0.01037	0.14031	0.00651	0.51138	0.01194	12.6738	0.36603	0.17975	0.00258	0.8705	2662.53	51.13	2650.52	23.97	-0.5
9357-013.1	IP480-1	112.85	104.38	0.95553	0.02103	68	5	0.00011509	9.079e-05	0.00199	0.00157	0.252	0.00589	0.12963	0.00499	0.49152	0.01048	11.9214	0.30054	0.17591	0.00195	0.9002	2577.27	45.44	2614.64	18.53	1.4
9357-014.1	IP480-1	127.45	86.88	0.7042	0.01568	73	4	8.281e-05	6.768e-05	0.00144	0.00117	0.19115	0.00875	0.13336	0.00723	0.49128	0.00916	11.5072	0.25902	0.16988	0.00178	0.8868	2576.21	39.73	2556.45	17.66	-0.8
9357-017.1	IP480-1	153.32	95.68	0.64468	0.01527	77	1	1.424e-05	4.586e-05	0.00025	0.00079	0.1774	0.00873	0.12067	0.00688	0.43853	0.00716	9.49424	0.20374	0.15702	0.00189	0.8309	2344.04	32.16	2423.85	20.56	3.3
9357-019.1	IP480-1	60.09	36.72	0.63133	0.02149	35	1	2.994e-05	5.688e-05	0.00052	0.00099	0.17394	0.00547	0.13628	0.00673	0.49467	0.00848	12.551	0.27065	0.18402	0.00205	0.8593	2590.85	36.67	2689.43	18.49	3.7
9357-020.1	IP480-1	222.46	124.23	0.57688	0.0123	84	10	0.00015738	4.736e-05	0.00273	0.00082	0.16006	0.00404	0.09522	0.00355	0.34319	0.00594	5.82402	0.12437	0.12308	0.0013	0.872	1902.01	28.57	2001.33	18.83	5
9357-021.1	IP480-1	26.58	47.37	1.84096	0.24039	18	10	0.00085307	0.00060085	0.01478	0.01041	0.43016	0.03258	0.11505	0.01793	0.49238	0.0191	12.1342	0.91975	0.17874	0.0108	0.6115	2580.94	83.04	2641.19	104.04	2.3
9357-022.2	IP480-2	21.18	11.58	0.5647	0.02503	16	0	1e-05	1e-05	0.00017	0.00017	0.17131	0.01396	0.18699	0.01799	0.61638	0.01573	19.7748	0.611	0.23268	0.00338	0.8845	3095.51	63.02	3070.58	23.41	-0.8
9357-023.1	IP480-1	23	12.74	0.57242	0.03364	15	3	0.00025929	0.00022365	0.00449	0.00388	0.13935	0.01193	0.13813	0.01604	0.56742	0.02947	17.9709	1.11238	0.2297	0.00639	0.8952	2897.21	122.36	3049.97	45.22	5
9357-024.2	IP480-2	100.53	52.29	0.53731	0.0195	55	2	4.297e-05	5.686e-05	0.00074	0.00099	0.13941	0.00677	0.12543	0.00781	0.4834	0.00684	11.5712	0.20813	0.17361	0.00165	0.8522	2542.06	29.78	2592.74	15.91	2
9357-025.1	IP480-1	44.38	49.36	1.14918	0.02875	18	1	4.41e-05	0.00022705	0.00076	0.00393	0.31773	0.01383	0.09007	0.0049	0.32576	0.00679	5.30052	0.22971	0.11801	0.00419	0.5835	1817.79	33.12	1926.32	64.97	5.6
9357-026.2	IP480-2	80.18	86.02	1.10827	0.02467	38	3	0.00013282	0.00010122	0.0023	0.00175	0.34943	0.00997	0.11705	0.00465	0.37125	0.00605	6.30231	0.16439	0.12312	0.00227	0.7129	2035.29	28.5	2001.93	33.11	-1.7
9357-027.2	IP480-2	128.5	85.66	0.68867	0.01738	74	4	6.659e-05	3.183e-05	0.00115	0.00055	0.2021	0.0043	0.14354	0.00521	0.48913	0.00739	11.7225	0.22089	0.17382	0.00166	0.8649	2566.91	32.07	2594.76	15.99	1.1
9357-028.2	IP480-2	91.03	61.82	0.70161	0.02738	52	1	1.924e-05	0.00013034	0.00033	0.00226	0.19625	0.01078	0.13653	0.00942	0.48812	0.00717	11.4753	0.25113	0.17051	0.00247	0.7541	2562.53	31.14	2562.61	24.44	0
9357-030.2	IP480-2	84.14	49.89	0.61253	0.01517	41	1	4.83e-05	8.46e-05	0.00084	0.00147	0.17224	0.00601	0.1202	0.00546	0.42748	0.0065	8.94572	0.18502	0.15177	0.00186	0.8089	2294.36	29.41	2366	21.07	3
9357-031.1	IP480-1	62.71	35.52	0.58518	0.01617	27	3	0.00015547	0.00011046	0.00269	0.00191	0.15499	0.00918	0.10279	0.00728	0.3881	0.01055	8.13585	0.28164	0.15204	0.00278	0.8516	2114.01	49.2	2369	31.54	10.8
9357-032.2	IP480-2	51.07	26.43	0.53467	0.02133	21	1	9.344e-05	9.864e-05	0.00162	0.00171	0.18181	0.0273	0.12401	0.01936	0.36469	0.00567	6.22969	0.15281	0.12389	0.00212	0.7215	2004.36	26.86	2013.02	30.68	0.4
9357-033.2	IP480-2	106.13	143.08	1.39281	0.03015	75	2	5.283e-05	3.345e-05	0.00092	0.00058	0.41525	0.01472	0.15279	0.00675	0.51249	0.00769	13.069	0.24702	0.18495	0.0018	0.8589	2667.26	32.88	2697.77	16.21	1.1
9357-034.1	IP480-1	72.35	75.46	1.0775	0.026	46	10	0.00033232	0.00010597	0.00576	0.00184	0.28084	0.01191	0.13043	0.00704	0.50041	0.01157	12.7741	0.37716	0.18514	0.00291	0.8495	2615.55	49.89	2699.48	26.17	3.1
9357-035.1	IP480-1	85.97	17.66	0.21223	0.00563	32	6	0.00020651	7.014e-05	0.00358	0.00122	0.05662	0.00721	0.09772	0.01284	0.36627	0.00674	6.24102	0.14853	0.12358	0.0016	0.8412	2011.83	31.88	2008.56	23.2	-0.2
9357-036.1	IP480-1	48.42	20.42	0.43573	0.01749	31	5	0.00020159	9.856e-05	0.00349	0.00171	0.10435	0.00627	0.13569	0.01012	0.5666	0.01048	17.1292	0.4107	0.21926	0.00288	0.8399	2893.83	43.28	2975.27	21.29	2.7
9357-038.1	IP480-1	158.23	238.66	1.55813	0.03368	93	4	7.628e-05	3.681e-05	0.00132	0.00064	0.43852	0.00689	0.1203	0.0041	0.42744	0.00907	9.08014	0.23061	0.15407	0.00178	0.8922	2294.15	41.08	2391.61	19.81	4.1
9357-039.1	IP480-1	44.43	76.25	1.77291	0.08183	32	3	0.00013401	0.00024786	0.00232	0.0043	0.46673	0.01847	0.13151	0.00925	0.49955	0.01766	12.9455	0.61159	0.18795	0.00512	0.8203	2611.88	76.37	2724.27	45.58	4.1
9357-040.2	IP480-2	168.22	74.3	0.45627	0.01058	79	3	4.091e-05	2.292e-05	0.00071	0.0004	0.13887	0.00706	0.12935	0.00748	0.42499	0.0063	8.63921	0.18379	0.14743	0.00199	0.7767	2283.11	28.58	2316.34	23.35	1.4
9357-041.2	IP480-2	49.47	56.42	1.17811	0.02777	31	3	0.00013241	9.749e-05	0.00229	0.00169	0.31349	0.02088	0.13059	0.00948	0.49076	0.00817	11.7476	0.30394	0.17361	0.0031	0.7293	2573.97	35.41	2592.76	30.07	0.7
9357-042.1	IP480-2	69.13	45.14	0.67456	0.01893	39	0	1.359e-05	0.00016345	0.00024	0.00283	0.20056	0.00826	0.14349	0.00756	0.48262	0.00829	11.2977	0.32332	0.16978	0.00354	0.691	2538.68	36.13	2555.45	35.33	0.7
9357-043.2	IP480-2	51.7	40.07	0.80083	0.02172	20	6	0.00041694	0.001182	0.00723	0.02049	0.19972	0.04497	0.08452	0.0193	0.33892	0.00885	5.50889	0.89963	0.11789	0.01862	0.2808	1881.45	42.73	1924.46	314.11	2.2
9357-044.2	IP480-2	21.28	20.65	1.00262	0.0291	14	3	0.00031001	0.00017324	0.00537	0.003	0.26562	0.03073	0.13485	0.01628	0.50902	0.00949	12.9156	0.40848	0.18403	0.00429	0.6817	2652.44	40.67	2689.5	39.08	1.4
9357-045.2	IP480-2	49.09	24.59	0.51745	0.0133	29	2	8.756e-05	0.00026208	0.00152	0.00454	0.13064	0.01156	0.13011	0.01218	0.51535	0.00833	13.4805	0.41133	0.18972	0.00454	0.6281	2679.42	35.55	2739.7	39.92	2.2
9357-047.1	IP480-1	166.73	106.45	0.65959	0.01553	91	3	3.78e-05	5.452e-05	0.00066	0.00094	0.15896	0.00682	0.11158	0.00587	0.46297	0.00897	13.5739	0.33341	0.21264	0.00273	0.8546	2452.65	39.66	2925.81	20.95	16.2
9357-048.1	IP480-1	80.08	115.77	1.49344	0.0373	31	3	0.00012979	0.0001916	0.00225	0.00332	0.42279	0.01892	0.08342	0.0046	0.29465	0.00599	4.83089	0.18582	0.11891	0.00359	0.6263	1664.74	29.87	1939.9	55.08	14.2
9357-049.1	IP480-1	128.53	45.02	0.36183	0.0122	40	3	8.702e-05	7.119e-05	0.00151	0.00123	0.10512	0.00535	0.08644	0.00551	0.29755	0.00545	4.96378	0.15005	0.12099	0.00264	0.6965	1679.13	27.14	1970.91	39.49	14.8
9357-050.1	IP480-1	146.63	125.4	0.88351	0.02084	57	4	0.00010666	0.00010374	0.00185	0.0018	0.2322	0.012	0.08659	0.00544	0.32948	0.00889	6.05369	0.27856	0.13326	0.00454	0.6786	1835.87	43.23	2141.31	60.8	14.3
9357-052.1	IP480-1	116.68	105.07	0.93021	0.02179	71	1	1.942e-05	3.53e-05	0.00034	0.00061	0.25051	0.01044	0.13163	0.007	0.48877	0.01138	12.5834	0.3493	0.18672	0.00233	0.8947	2565.37	49.45	2713.48	20.75	5.5
9357-053.1	IP480-1	193.45	154.47	0.8249	0.01825	95	1	1.391e-05	6.885e-05	0.00024	0.00119	0.21809	0.00787	0.1087	0.00514	0.41113	0.00862	9.3236	0.22675	0.16448	0.00164	0.9137	2220.07	39.52	2502.22	16.86	11.3
9357-055.1	IP480-1	39.03	38.34	1.0147	0.02818	24	13	0.00078437	0.0005437	0.01359	0.00942	0.2501	0.02674	0.12036	0.01384	0.48834	0.01565	12.3787	0.82449	0.18385	0.01002	0.5834	2563.49	68.13	2687.87	93.09	4.6
9357-058.1	IP480-1	63.34	36.22	0.59066	0.01699	35	4	0.00015863	0.00012454	0.00275	0.00216	0.1445	0.00815	0.11955	0.00806	0.48869	0.01127	12.1622	0.41934	0.1805	0.00413	0.752	2565.02	49	2657.46	38.48	3.5
9357-060.1	IP480-1	136.69	99.93	0.75525	0.01897	53	14	0.00034168	0.00011682	0.00592	0.00202	0.18638	0.00928	0.08416	0.00503	0.34105	0.00737	6.15648	0.19587	0.13092	0.00273	0.7607	1891.71	35.51	2110.38	36.97	10.4
9357-061.1	IP480-1	195.7	111.14	0.58668	0.01496	99	3	3.89e-05	5.879e-05	0.00067	0.00102	0.14233	0.00936	0.10858	0.00789	0.44753	0.00794	10.3227	0.23942	0.16729	0.00215	0.8348	2384.25	35.48	2530.72	21.76	5.8
9357-062.1	IP480-1	64.3	81.9	1.31583	0.04471	24	1	6.511e-05	0.0001059	0.00113	0.00184	0.38558	0.01511	0.08459	0.00481	0.28868	0.00669	4.9424	0.17605	0.12417	0.00302	0.7363	1634.92	33.58	2017.02	43.71	18.9
9357-063.1	IP480-1	103.93	73.92	0.73469	0.01797	36	6	0.00020617	0.00010568	0.00357	0.00183	0.20164	0.00845	0.08302	0.00434	0.30251	0.00592	5.04989	0.1798	0.12107	0.00332	0.646	1703.74	29.37	1972.07	49.65	13.6
9357-065.1	IP480-1	74.21	46.7	0.65016	0.01795	30	10	0.00042989	0.00028474	0.00745	0.00493	0.15018	0.01338	0.08408	0.00806	0.36399	0.00809	7.38593	0.31815	0.14717	0.00504	0.6151	2001.04	38.33	2313.3	59.95	13.5
9357-068.1	IP480-1	105.66	124.4	1.21627	0.03265	43	7	0.00025182	0.00011846	0.00436	0.00205	0.34847	0.00977	0.09129	0.00448	0.31862	0.00955	5.18527	0.19822	0.11803	0.00239	0.8506	1783	46.88	1926.62	36.75	7.5
9357-069.1	IP480-1	91.69	83.72	0.94333	0.02281	33	13	0.00053408	0.00035582	0.00926	0.00617	0.25502	0.01603	0.08248	0.00601	0.30509	0.00845	4.67842	0.29526	0.11122	0.00593	0.5446	1716.5	41.88	1819.4	100.12	5.7
9357-070.1	IP480-1	179.26	74.74	0.43073	0.01017	67	1	2.414e-05	4.096e-05	0.00042	0.00071	0.1184	0.00648	0.09534	0.00601	0.34681	0.00708	6.33866	0.15297	0.13256	0.0014	0.9008	1919.35	33.99	2132.12	18.6	10
9357-072.1	IP480-1	28.36	34.96	1.27351	0.03854	19	8	0.00060997	0.00025198	0.01057	0.00437	0.30263	0.02138	0.12292	0.01051	0.51724	0.01939	13.5357	0.71193	0.18979	0.00617	0.79	2687.48	82.92	2740.38	54.48	1.9
9357-074.1	IP480-1	117.21	132.24	1.16556	0.02675	71	12	0.00025096	7.52e-05	0.00435	0.0013	0.30661	0.01422	0.1261	0.00709	0.47937	0.01051	11.13	0.29035	0.16839	0.00196	0.8962	2524.52	45.95	2541.73	19.69	0.7
9357-075.1	IP480-1	119	89.9	0.78048	0.023	47	2	4.308e-05	6.772e-05	0.00075	0.00117	0.22054	0.00988	0.09646	0.00643	0.34137	0.01351	5.72557	0.33096	0.12165	0.00456	0.7656	1893.24	65.25	1980.5	68.29	4.4
9357-076.1	IP480-1	29.3	27.26	0.96111	0.02908	12	4	0.00049914	0.00031886	0.00865	0.00553	0.26399	0.03573	0.0968	0.01367	0.35243	0.00946	5.80725	0.34515	0.11951	0.00595	0.5561	1946.18	45.23	1948.89	91.76	0.1
9357-077.1	IP480-1	124.22	50.02	0.41601	0.0099	42	14	0.00039699	0.00081187	0.00688	0.01407	0.10522	0.03107	0.08187	0.02433	0.3237	0.00752	5.02856	0.59715	0.11267	0.0128	0.3152	1807.76	36.73	1842.91	221.22	1.9
9357-078.1	IP480-1	188.02	161.88	0.88944	0.01938	72	4	7.009e-05	0.00012814	0.00121	0.00222	0.23359	0.00706	0.0863	0.00359	0.3286	0.00613	5.20866	0.14929	0.11496	0.00225	0.736	1831.58	29.81	1879.32	35.67	2.5
9357-079.1	IP480-1	94.93	29.86	0.32498	0.0082	65	8	0.00016954	0.00012448	0.00294	0.00216	0.0857	0.00878	0.15841	0.01706	0.60067	0.01293	20.1563	0.54968	0.24337	0.00347	0.8547	3032.53	52.28	3142.17	22.85	3.5
9357-080.1	IP480-1	90.66	45.63	0.51987	0.01542	43	6	0.00017821	8.673e-05	0.00309	0.0015	0.13305	0.01183	0.10821	0.01041	0.42283	0.00914	9.47481	0.3716	0.16252	0.0049	0.6473	2273.3	41.55	2482.05	51.73	8.4
9357-081.1	IP480-1	134.15	72.03	0.55471	0.01366	60	7	0.00014827	7.091e-05	0.00257	0.00123	0.13739	0.00611	0.09948	0.00555	0.40167	0.0092	9.07608	0.24267	0.16388	0.00184	0.909	2176.72	42.44	2496.1	19.04	12.8
9357-083.1	IP480-1	140.94	70.12	0.51397	0.01269	49	22	0.00057048	0.00028046	0.00989	0.00486	0.10765	0.01187	0.06688	0.00779	0.3193	0.00897	6.48115	0.2928	0.14721	0.00472	0.7102	1786.32	43.96	2313.81	56.06	22.8
9357-084.1	IP480-1	160.47	119.72	0.77073	0.02206	115	1	1.268e-05	2.38e-05	0.00022	0.00041	0.19948	0.00808	0.15061	0.00811	0.58193	0.0122	18.4288	0.41857	0.22968	0.00149	0.9591	2956.6	49.93	3049.84	10.41	3.1
9357-085.1	IP480-1	156.42	84.04	0.55507	0.01643	82	9	0.00013741	4.794e-05	0.00238	0.00083	0.14584	0.00419	0.12188	0.0056	0.46387	0.00937	11.1414	0.26487	0.1742	0.00179	0.9036	2456.62	41.4	2598.39	17.21	5.5
9357-086.1	IP480-1	103.78	66.93	0.66628	0.01565	53	5	0.00012996	7.461e-05	0.00225	0.00129	0.18405	0.00579	0.12049	0.00529	0.4362	0.00858	9.94366	0.27379	0.16533	0.00281	0.7912	2333.6	38.61	2510.95	28.82	7.1
9357-088.1	IP480-1	36.24	21.39	0.60967	0.03212	19	2	0.00013025	0.00021779	0.00226	0.00377	0.16907	0.0145	0.12512	0.01305	0.4512	0.01234	10.1203	0.43219	0.16268	0.00481	0.7271	2400.59	55.07	2483.66	50.7	3.3
9357-089.1	IP480-1	12.35	9.31	0.77828	1.50321	5	11	0.00261236	0.00506304	0.04527	0.08775	0.15861	0.19605	0.07471	0.1715	0.3666	0.0382	6.4455	4.268	0.12751	0.08174	0.2784	2013.41	182.78	2063.98	2062.91	2.5
9357-092.1	IP480-1	55.04	35.69	0.6699	0.0236	40	6	0.00021195	9.965e-05	0.00367	0.00173	0.17121	0.00688	0.15232	0.00885	0.59599	0.01356	20.54	0.5635	0.24996	0.00318	0.8875	3013.65	55.01	3184.48	20.32	5.4
9357-095.1	IP480-1	48.56	26.65	0.5669	0.01706	25	0	1e-05	1e-05	0.00017	0.00017	0.16184	0.00678	0.12725	0.00701	0.44573	0.00865	9.90843	0.30438	0.16122	0.00347	0.7194	2376.25	38.7	2468.54	36.78	3.7
9357-096.1	IP480-1	84.8	131.47	1.60172	0.03722	41	11	0.00040636	0.000451	0.00704	0.00782	0.44885	0.02614	0.09917	0.00659	0.3539	0.00777	6.07932	0.39287	0.12459	0.00724	0.4522	1953.18	37.12	2022.95	106.7	3.4
9357-101.1	IP480-1	54.7	40.25	0.76023	0.02296	45	4	0.00012633	6.617e-05	0.00219	0.00115	0.18637	0.00618	0.1608	0.00807	0.65593	0.01479	24.7773	0.72023	0.27397	0.00431	0.8433	3251.32	57.82	3328.87	24.87	2.3
9357-102.1	IP480-1	94.93	95.62	1.04059	0.02759	55	8	0.00020937	0.00011032	0.00363	0.00191	0.27263	0.01755	0.1221	0.00897	0.46606	0.01093	11.2905	0.3402	0.1757	0.00285	0.8457	2466.25	48.25	2612.7	27.24	5.6
9357-103.1	IP480-1	140.11	92.11	0.67918	0.0159	67	4	8.559e-05	4.626e-05	0.00148	0.0008	0.18113	0.00449	0.11082	0.00456	0.41555	0.00956	9.30364	0.24195	0.16238	0.00156	0.9308	2240.26	43.69	2480.56	16.25	9.7
9357-104.1	IP480-1	118.11	134.72	1.17834	0.04411	44	4	0.00011414	8.909e-05	0.00198	0.00154	0.31536	0.01009	0.08099	0.00455	0.3026	0.00822	5.14314	0.20243	0.12327	0.00312	0.7703	1704.19	40.79	2004.09	45.62	15
9357-106.1	IP480-1	126.88	48.89	0.39805	0.00993	46	3	8.754e-05	5.773e-05	0.00152	0.001	0.1153	0.00494	0.09878	0.00538	0.34101	0.00773	6.09218	0.18271	0.12957	0.0022	0.8266	1891.52	37.26	2092.14	30.21	9.6
9357-107.1	IP480-1	104.38	76.61	0.7582	0.01771	57	9	0.00021888	6.875e-05	0.00379	0.00119	0.19368	0.00584	0.11895	0.00519	0.46565	0.0099	11.3906	0.28391	0.17741	0.00188	0.9065	2464.48	43.71	2628.82	17.74	6.3
9357-108.1	IP480-1	212.34	73.62	0.35816	0.01138	111	3	3.536e-05	3.835e-05	0.00061	0.00066	0.09622	0.00278	0.12783	0.00591	0.4758	0.00817	11.5958	0.22162	0.17676	0.00115	0.9414	2508.95	35.8	2622.67	10.85	4.3
9357-109.1	IP480-1	174.01	80.12	0.47567	0.0121	88	11	0.00016762	7.976e-05	0.0029	0.00138	0.12879	0.00455	0.12293	0.00583	0.45402	0.00852	10.1591	0.27224	0.16228	0.00275	0.7794	2413.12	37.9	2479.59	28.83	2.7
9357-112.1	IP480-1	79.26	65.5	0.85365	0.02235	33	3	0.0001077	0.00010012	0.00187	0.00174	0.24587	0.01186	0.10057	0.00601	0.34917	0.00824	5.74749	0.24036	0.11938	0.00378	0.659	1930.65	39.49	1946.98	57.78	0.8
9357-115.1	IP480-1	130.86	111.91	0.88349	0.02555	78	12	0.00022056	6.087e-05	0.00382	0.00106	0.24123	0.00537	0.13408	0.00538	0.49104	0.00815	11.7823	0.27525	0.17402	0.00252	0.7882	2575.18	35.34	2596.73	24.36	0.8
07RAT-18
9358-001.1	IP480-1	266.97	311.52	1.20546	0.0264	115	3	3.837e-05	1.411e-05	0.00066	0.00024	0.35694	0.00411	0.10061	0.00296	0.33977	0.00542	5.44721	0.0977	0.11627	0.00075	0.9345	1885.57	26.14	1899.73	11.61	0.7
9358-002.1	IP480-1	199.42	75.22	0.38966	0.00908	73	2	3.373e-05	2.392e-05	0.00058	0.00041	0.10082	0.00242	0.08983	0.00332	0.3472	0.00543	5.84534	0.106	0.1221	0.00091	0.9138	1921.24	26.04	1987.17	13.27	3.3
9358-003.1	IP480-1	111.1	78.56	0.73044	0.01607	94	0	4e-07	1.383e-05	1e-05	0.00024	0.17957	0.0033	0.16699	0.00556	0.67929	0.01149	25.4345	0.49285	0.27156	0.00206	0.9215	3341.63	44.24	3315.06	11.94	-0.8
9358-005.1	IP480-1	60.19	58.98	1.01217	0.02315	38	1	4.505e-05	0.00010848	0.00078	0.00188	0.27266	0.01184	0.13571	0.00714	0.5038	0.00954	12.8312	0.31543	0.18472	0.00249	0.8392	2630.1	41.04	2695.7	22.43	2.4
9358-006.1	IP480-1	182.11	112.01	0.63539	0.01347	70	6	0.00010911	3.653e-05	0.00189	0.00063	0.17278	0.00653	0.09452	0.00442	0.34759	0.00612	5.6318	0.12342	0.11751	0.0013	0.8666	1923.07	29.35	1918.72	19.9	-0.2
9358-007.1	IP480-1	166.54	75.47	0.46812	0.01013	60	2	4.08e-05	2.775e-05	0.00071	0.00048	0.13155	0.00497	0.09462	0.00441	0.33669	0.00555	5.32536	0.10163	0.11471	0.00089	0.9148	1870.73	26.83	1875.39	14.07	0.2
9358-010.1	IP480-1	154.53	83.38	0.55738	0.01456	84	3	3.958e-05	2.243e-05	0.00069	0.00039	0.15088	0.0073	0.12971	0.00748	0.47915	0.00836	10.8249	0.24132	0.16385	0.00194	0.8493	2523.57	36.54	2495.79	20.11	-1.1
9358-012.2	IP480-2	705.36	447.11	0.65483	0.01416	151	67	0.00053705	6.477e-05	0.00931	0.00112	0.09266	0.00327	0.02908	0.00169	0.2055	0.00837	3.24894	0.14359	0.11467	0.00147	0.958	1204.77	44.93	1874.66	23.22	35.7
9358-014.1	IP480-1	179.32	142.66	0.82186	0.01731	71	5	9.167e-05	3.224e-05	0.00159	0.00056	0.23239	0.00438	0.0957	0.00312	0.33844	0.00551	5.72571	0.12695	0.1227	0.00162	0.808	1879.18	26.57	1995.84	23.59	5.8
9358-015.1	IP480-1	109.9	40.02	0.37615	0.00951	39	0	7.48e-06	3.481e-05	0.00013	0.0006	0.10382	0.00369	0.09221	0.00434	0.33409	0.0059	5.39627	0.12948	0.11715	0.00166	0.8097	1858.17	28.56	1913.15	25.69	2.9
9358-016.1	IP480-1	80.21	44.73	0.5761	0.0143	43	3	9.785e-05	7.364e-05	0.0017	0.00128	0.15157	0.00487	0.12521	0.0055	0.47589	0.00797	11.2345	0.23157	0.17122	0.00173	0.8736	2509.35	34.9	2569.57	17	2.3
9358-018.1	IP480-1	36.91	21.15	0.59193	0.01671	21	6	0.00036888	0.00024151	0.00639	0.00419	0.16043	0.02036	0.1314	0.01733	0.48479	0.01073	11.401	0.41148	0.17056	0.00441	0.7029	2548.12	46.76	2563.17	43.95	0.6
9358-019.1	IP480-1	74.63	118.92	1.64613	0.03599	36	6	0.00027618	0.00013562	0.00479	0.00235	0.4394	0.00964	0.09478	0.00336	0.35506	0.0061	5.85746	0.16475	0.11965	0.00242	0.7006	1958.73	29.08	1950.96	36.59	-0.4
9358-020.1	IP480-1	245.67	149.38	0.62814	0.01427	99	2	2.277e-05	3.068e-05	0.00039	0.00053	0.17032	0.00373	0.09817	0.00346	0.36207	0.00564	6.15107	0.10789	0.12321	0.00078	0.9339	1991.98	26.77	2003.27	11.27	0.6
9358-021.1	IP480-1	145.97	61.94	0.43835	0.01142	57	4	9.567e-05	5.786e-05	0.00166	0.001	0.1204	0.00511	0.10027	0.00528	0.36507	0.00625	6.08342	0.12736	0.12086	0.00122	0.8776	2006.17	29.56	1968.9	18.15	-1.9
9358-022.1	IP480-1	68.96	23.16	0.34691	0.0105	24	6	0.00031452	9.385e-05	0.00545	0.00163	0.09666	0.006	0.09292	0.00666	0.33348	0.00637	5.23738	0.15503	0.11391	0.00232	0.7315	1855.22	30.88	1862.64	37.19	0.4
9358-025.1	IP480-1	158.52	40.01	0.26074	0.00597	83	3	4.763e-05	3.931e-05	0.00083	0.00068	0.07018	0.00235	0.13245	0.00578	0.49208	0.00795	11.6024	0.22039	0.171	0.0014	0.9044	2579.69	34.44	2567.5	13.73	-0.5
9358-026.1	IP480-1	330.56	180.69	0.56467	0.01169	175	4	3.039e-05	1.944e-05	0.00053	0.00034	0.15626	0.00211	0.1287	0.0038	0.4651	0.00752	10.4572	0.18474	0.16307	0.00088	0.953	2462.03	33.16	2487.72	9.12	1
9358-028.1	IP480-1	148.25	146.78	1.0228	0.02178	80	2	2.831e-05	3.177e-05	0.00049	0.00055	0.28071	0.0052	0.12025	0.00394	0.43815	0.00727	8.97487	0.17055	0.14856	0.0011	0.9218	2342.37	32.66	2329.41	12.77	-0.6
9358-029.1	IP480-1	109.8	59.23	0.55729	0.01274	57	1	2.827e-05	3.783e-05	0.00049	0.00066	0.14869	0.00672	0.12324	0.00676	0.46192	0.00976	10.3338	0.26208	0.16225	0.00189	0.8905	2448.01	43.18	2479.28	19.76	1.3
9358-033.1	IP480-1	142.26	46.3	0.33624	0.00772	51	0	8.97e-06	5.343e-05	0.00016	0.00093	0.09032	0.00498	0.0934	0.00579	0.34768	0.00571	5.74923	0.11625	0.11993	0.00119	0.8737	1923.53	27.38	1955.16	17.81	1.6
9358-034.1	IP480-1	184.61	189.02	1.05772	0.02366	80	5	9.315e-05	7.454e-05	0.00161	0.00129	0.28522	0.02239	0.09671	0.00804	0.35863	0.0057	5.86873	0.12544	0.11868	0.00148	0.8162	1975.69	27.09	1936.51	22.45	-2
9358-035.1	IP480-1	230.69	79.96	0.35809	0.00773	120	6	6.513e-05	2.256e-05	0.00113	0.00039	0.08354	0.00448	0.11266	0.00685	0.48292	0.00901	11.3217	0.22517	0.17003	0.00084	0.9694	2539.97	39.3	2557.98	8.26	0.7
9358-036.1	IP480-1	36.79	15.3	0.42958	0.01516	21	1	6.941e-05	6.36e-05	0.0012	0.0011	0.11462	0.00942	0.13613	0.01261	0.51019	0.01231	12.9485	0.41468	0.18407	0.00336	0.8245	2657.43	52.75	2689.91	30.51	1.2
9358-038.1	IP480-1	154.04	57.23	0.38378	0.01046	55	2	3.421e-05	3.332e-05	0.00059	0.00058	0.10382	0.00297	0.09134	0.00397	0.33764	0.00608	5.47654	0.14074	0.11764	0.00191	0.7793	1875.29	29.35	1920.68	29.39	2.4
9358-041.1	IP480-1	843.1	166.06	0.20347	0.00422	249	69	0.00032433	2.771e-05	0.00562	0.00048	0.05548	0.00264	0.08011	0.00444	0.29384	0.00575	4.57233	0.09531	0.11285	0.00058	0.9698	1660.71	28.72	1845.89	9.3	10
9358-043.1	IP480-1	202.39	80.55	0.41116	0.00919	71	5	9.002e-05	4.909e-05	0.00156	0.00085	0.11434	0.00473	0.09263	0.00464	0.3331	0.0057	5.27958	0.11884	0.11495	0.00145	0.8307	1853.39	27.63	1879.17	22.94	1.4
9358-045.1	IP480-1	51.34	23.91	0.4812	0.01664	20	2	0.00015072	6.947e-05	0.00261	0.0012	0.12485	0.00769	0.09221	0.00678	0.35538	0.00719	5.76589	0.16142	0.11767	0.002	0.7986	1960.26	34.29	1921.14	30.76	-2
9358-046.1	IP480-1	190.73	57.31	0.31043	0.00684	90	5	6.94e-05	4.123e-05	0.0012	0.00071	0.08058	0.00592	0.11499	0.00901	0.44299	0.00701	9.36577	0.19754	0.15334	0.00186	0.8216	2364.03	31.37	2383.46	20.79	0.8
9358-049.1	IP480-1	126.71	28.82	0.23494	0.00557	43	3	9.113e-05	4.937e-05	0.00158	0.00086	0.06246	0.00387	0.08977	0.00613	0.33767	0.00551	5.50761	0.13286	0.11829	0.00187	0.7585	1875.46	26.6	1930.63	28.65	2.9
9358-050.1	IP480-1	140.91	119.93	0.87922	0.02284	64	7	0.00015685	6.551e-05	0.00272	0.00114	0.24535	0.01114	0.10625	0.00585	0.38075	0.00658	6.86366	0.1532	0.13074	0.00159	0.8421	2079.78	30.79	2107.96	21.45	1.3
9358-051.1	IP480-1	240.63	101.39	0.43529	0.00966	91	0	3.53e-06	1.694e-05	6e-05	0.00029	0.11199	0.0027	0.09146	0.00338	0.35549	0.00605	6.0164	0.12059	0.12274	0.00107	0.903	1960.78	28.83	1996.5	15.5	1.8
9358-053.1	IP480-1	48.66	65.49	1.39042	0.03979	20	2	0.00018247	0.00016022	0.00316	0.00278	0.36859	0.01273	0.08538	0.00413	0.32207	0.00583	5.02357	0.17108	0.11312	0.00302	0.6298	1799.85	28.51	1850.21	49.01	2.7
9358-054.1	IP480-1	52.59	38.51	0.75641	0.01818	28	3	0.00012428	7.531e-05	0.00215	0.00131	0.19439	0.00665	0.11933	0.00552	0.46435	0.0092	10.3101	0.46835	0.16103	0.0062	0.542	2458.72	40.62	2466.55	66.49	0.3
9358-055.1	IP480-1	59.29	46.87	0.81662	0.02503	23	1	6.706e-05	5.191e-05	0.00116	0.0009	0.22763	0.00734	0.09424	0.00465	0.33807	0.00719	5.39167	0.1819	0.11567	0.00274	0.7185	1877.38	34.76	1890.32	43.19	0.7
9358-056.1	IP480-1	219.86	119.5	0.56152	0.01285	84	6	9.63e-05	4.493e-05	0.00167	0.00078	0.15972	0.00331	0.09901	0.00348	0.34806	0.00583	5.7919	0.12758	0.12069	0.00149	0.8306	1925.34	27.94	1966.41	22.21	2.1
9358-057.1	IP480-1	125.85	41.89	0.34384	0.00855	66	0	3.5e-07	2.667e-05	1e-05	0.00046	0.0899	0.00386	0.12635	0.00701	0.48322	0.01203	11.4672	0.50519	0.17211	0.00574	0.6599	2541.27	52.51	2578.3	56.83	1.4
9358-058.1	IP480-1	134.63	184.91	1.41889	0.03003	61	4	0.00010147	4.248e-05	0.00176	0.00074	0.39189	0.01081	0.09644	0.0037	0.34916	0.00564	5.59096	0.10928	0.11613	0.00107	0.8849	1930.58	27	1897.56	16.59	-1.7
9358-059.1	IP480-1	135.02	70.03	0.53581	0.01195	73	5	9.066e-05	2.607e-05	0.00157	0.00045	0.14142	0.00407	0.12694	0.00519	0.48095	0.00896	10.9399	0.2689	0.16497	0.00229	0.8287	2531.42	39.13	2507.25	23.51	-1
9358-060.1	IP480-1	105.41	45.15	0.44249	0.0132	51	2	4.715e-05	6.625e-05	0.00082	0.00115	0.11404	0.00413	0.11322	0.00565	0.43931	0.00747	9.71058	0.19721	0.16032	0.00147	0.8937	2347.53	33.54	2459	15.61	4.5
9358-061.1	IP480-1	104.58	58.72	0.58003	0.01764	58	9	0.00020302	4.767e-05	0.00352	0.00083	0.14878	0.00644	0.12605	0.00698	0.49141	0.00803	11.6093	0.21869	0.17134	0.0013	0.9172	2576.79	34.78	2570.77	12.7	-0.2
9358-063.1	IP480-1	1046.39	1204.26	1.18891	0.02869	549	78	0.00020507	2.867e-05	0.00355	0.0005	0.29034	0.00261	0.10332	0.00331	0.42309	0.00804	8.74023	0.18091	0.14983	0.00092	0.9556	2274.5	36.54	2343.94	10.56	3
9358-065.1	IP480-1	67.13	33.16	0.51028	0.01474	35	1	4.81e-05	7.065e-05	0.00083	0.00122	0.15955	0.00574	0.14303	0.00714	0.45745	0.0087	10.5584	0.24053	0.1674	0.00174	0.8921	2428.29	38.61	2531.81	17.51	4.1
9358-067.1	IP480-1	95.27	74.35	0.8062	0.02013	52	0	1e-05	1e-05	0.00017	0.00017	0.21296	0.00764	0.12153	0.00591	0.46006	0.00977	10.5592	0.29109	0.16646	0.00252	0.8389	2439.84	43.28	2522.37	25.63	3.3
9358-068.1	IP480-1	169.68	156.81	0.95472	0.02016	89	0	3.85e-06	1.896e-05	7e-05	0.00033	0.27349	0.0055	0.12249	0.00407	0.42759	0.00681	8.84163	0.15615	0.14997	0.00088	0.944	2294.85	30.84	2345.58	10.08	2.2
9358-069.1	IP480-1	106.72	61.72	0.59745	0.0155	41	6	0.00018014	7.341e-05	0.00312	0.00127	0.15545	0.00534	0.09149	0.00424	0.35162	0.00602	5.90096	0.1342	0.12171	0.00158	0.8242	1942.35	28.78	1981.51	23.29	2
9358-070.1	IP480-1	135.8	79.95	0.6082	0.01415	51	8	0.00020193	6.069e-05	0.0035	0.00105	0.16403	0.0047	0.09179	0.0038	0.34035	0.00639	5.35249	0.12973	0.11406	0.0015	0.8424	1888.36	30.8	1865.05	23.95	-1.2
9358-073.1	IP480-1	88.57	39.96	0.46615	0.0134	41	2	4.79e-05	0.00013636	0.00083	0.00236	0.12685	0.00703	0.11379	0.00749	0.41816	0.00865	10.0311	0.50565	0.17398	0.00756	0.5181	2252.13	39.44	2596.31	74.35	13.3
9358-074.2	IP480-2	160.65	46.3	0.29775	0.007	74	2	4.038e-05	3.63e-05	0.0007	0.00063	0.0876	0.00502	0.1267	0.00809	0.43064	0.00653	9.32829	0.16299	0.1571	0.0011	0.9177	2308.59	29.48	2424.73	11.92	4.8
9358-075.2	IP480-2	111.8	50.65	0.46798	0.0108	43	4	0.00012858	6.192e-05	0.00223	0.00107	0.12451	0.00482	0.09499	0.0045	0.35704	0.00519	5.82505	0.13328	0.11833	0.00189	0.7222	1968.11	24.69	1931.13	28.85	-1.9
9358-076.2	IP480-2	140.77	95.21	0.69871	0.02015	56	2	3.713e-05	5.207e-05	0.00064	0.0009	0.20374	0.00528	0.10279	0.00444	0.35252	0.00675	5.76341	0.15182	0.11857	0.00188	0.8025	1946.64	32.27	1934.84	28.63	-0.6
9358-078.1	IP480-1	122.5	66.09	0.55737	0.01378	52	2	6.019e-05	9.096e-05	0.00104	0.00158	0.14589	0.01099	0.10027	0.00815	0.38308	0.00687	7.84352	0.18658	0.1485	0.00201	0.8251	2090.65	32.1	2328.7	23.39	10.2
9358-080.1	IP480-1	61.23	69.41	1.1711	0.03017	25	0	2.234e-05	0.00012569	0.00039	0.00218	0.30158	0.01657	0.08454	0.00541	0.3283	0.00671	5.54897	0.16881	0.12259	0.00247	0.7543	1830.14	32.64	1994.2	36.23	8.2
9358-082.1	IP480-1	82.02	73.3	0.92328	0.02412	49	5	0.0001369	7.054e-05	0.00237	0.00122	0.23473	0.01281	0.12446	0.00782	0.48954	0.00836	12.1462	0.24862	0.17995	0.00169	0.8911	2568.69	36.26	2652.41	15.62	3.2
9358-083.1	IP480-1	148.69	97.22	0.67546	0.01471	80	1	1e-05	1e-05	0.00017	0.00017	0.17332	0.0034	0.11961	0.00404	0.46616	0.00781	11.1833	0.20561	0.174	0.001	0.9505	2466.68	34.43	2596.45	9.63	5
9358-087.1	IP480-1	157.54	193.09	1.26618	0.0272	67	3	7.615e-05	2.878e-05	0.00132	0.0005	0.35407	0.0067	0.09351	0.00311	0.33441	0.00566	5.43094	0.1072	0.11779	0.00098	0.9093	1859.7	27.38	1922.93	14.92	3.3
9358-089.1	IP480-1	105.52	83.85	0.82092	0.01835	59	5	0.00010705	8.232e-05	0.00186	0.00143	0.21753	0.01191	0.12369	0.00783	0.46678	0.01052	11.1899	0.3127	0.17387	0.00242	0.8689	2469.4	46.4	2595.21	23.44	4.8
9358-090.1	IP480-1	80	169.96	2.19467	0.06224	56	4	0.00013724	7.765e-05	0.00238	0.00135	0.60166	0.01259	0.12503	0.00501	0.45606	0.00868	11.7151	0.28955	0.18631	0.00253	0.8384	2422.13	38.53	2709.82	22.57	10.6
9358-091.1	IP480-1	95.26	45.73	0.49587	0.01168	55	4	0.00010041	6.884e-05	0.00174	0.00119	0.12795	0.00467	0.13003	0.00605	0.50393	0.00839	14.4207	0.31843	0.20755	0.00261	0.8249	2630.65	36.05	2886.49	20.57	8.9
9358-092.1	IP480-1	104.14	56.93	0.5648	0.0137	39	0	1.031e-05	0.00010464	0.00018	0.00181	0.1636	0.00729	0.09869	0.00556	0.3407	0.00839	6.04632	0.26423	0.12871	0.00427	0.6581	1890.05	40.45	2080.44	59.56	9.2
9358-093.1	IP480-1	78.78	38.03	0.49865	0.01385	26	4	0.00017514	0.00012351	0.00304	0.00214	0.14477	0.00902	0.08881	0.00629	0.30591	0.00579	5.06536	0.15337	0.12009	0.00257	0.7132	1720.53	28.64	1957.61	38.69	12.1
9358-095.1	IP480-1	124.87	79.59	0.65846	0.01515	63	3	7.026e-05	3.684e-05	0.00122	0.00064	0.18421	0.00622	0.1219	0.00541	0.43574	0.00755	10.1295	0.22883	0.1686	0.00211	0.8363	2331.53	34	2543.81	21.08	8.3
9358-096.1	IP480-1	101.13	13.19	0.13475	0.00442	26	4	0.00018997	0.00011942	0.00329	0.00207	0.03505	0.00542	0.0673	0.01071	0.25875	0.00479	4.06974	0.12003	0.11407	0.00237	0.7156	1483.43	24.58	1865.31	37.96	20.5
9358-097.1	IP480-1	52.29	15.82	0.31257	0.00961	19	1	6.105e-05	0.00015794	0.00106	0.00274	0.08208	0.01089	0.08987	0.01249	0.34224	0.0095	6.08198	0.24521	0.12889	0.00335	0.7689	1897.42	45.78	2082.88	46.45	8.9
9358-098.1	IP480-1	191.05	70.44	0.38089	0.00845	87	4	5.799e-05	2.37e-05	0.001	0.00041	0.09957	0.00258	0.1104	0.00418	0.42233	0.00696	9.15935	0.16883	0.15729	0.00101	0.9381	2271.04	31.63	2426.78	10.96	6.4
9358-099.1	IP480-1	137.14	51.38	0.38707	0.00981	48	3	7.456e-05	4.867e-05	0.00129	0.00084	0.10729	0.00395	0.09238	0.00443	0.33328	0.0058	5.63619	0.12426	0.12265	0.00141	0.8551	1854.28	28.12	1995.14	20.62	7.1
9358-102.2	IP480-2	49.29	19.67	0.41224	0.01792	30	1	5.722e-05	7.086e-05	0.00099	0.00123	0.11806	0.00583	0.1559	0.01055	0.5444	0.00859	14.8414	0.29717	0.19772	0.00208	0.8536	2801.83	35.95	2807.5	17.29	0.2
9358-103.1	IP480-1	61.3	53.43	0.90051	0.02561	22	3	0.00016426	0.00017355	0.00285	0.00301	0.23848	0.01131	0.08029	0.0047	0.3032	0.00577	4.86174	0.20953	0.1163	0.00423	0.5467	1707.15	28.58	1900.04	66.86	10.2
9358-105.2	IP480-2	130.59	27.23	0.2154	0.00601	53	8	0.0001727	6.422e-05	0.00299	0.00111	0.05101	0.00367	0.09503	0.00748	0.40127	0.00621	7.427	0.15522	0.13424	0.00164	0.8141	2174.89	28.65	2154.13	21.51	-1
9358-106.1	IP480-1	120.22	19	0.16324	0.00431	34	6	0.00022317	6.689e-05	0.00387	0.00116	0.03886	0.00365	0.06676	0.00662	0.28043	0.00498	4.53304	0.1346	0.11724	0.00254	0.689	1593.51	25.1	1914.55	39.44	16.8
9358-107.2	IP480-2	21.01	13.85	0.68126	0.02455	12	4	0.00040271	0.00019711	0.00698	0.00342	0.18832	0.01605	0.13617	0.01286	0.49258	0.00926	12.8564	0.42566	0.1893	0.00473	0.6623	2581.83	40.12	2736.06	41.75	5.6
9358-108.1	IP480-1	61.65	37	0.61994	0.0161	27	2	0.00010792	0.00011155	0.00187	0.00193	0.16285	0.00773	0.09962	0.00574	0.37924	0.00747	8.67869	0.2362	0.16597	0.00274	0.799	2072.73	34.99	2517.45	27.99	17.7
9358-109.2	IP480-2	110.94	76.19	0.70944	0.01632	63	0	8.74e-06	3.014e-05	0.00015	0.00052	0.19608	0.00552	0.13316	0.0053	0.48178	0.00781	11.204	0.24243	0.16866	0.0021	0.8212	2535.02	34.07	2544.43	21.01	0.4
9358-110.2	IP480-2	87.15	108.26	1.28328	0.03396	57	4	0.0001179	0.00010762	0.00204	0.00187	0.38074	0.00839	0.14495	0.00545	0.48854	0.00735	11.4047	0.23917	0.16931	0.00218	0.7937	2564.35	31.9	2550.84	21.7	-0.5
9358-111.2	IP480-2	91.44	65.94	0.74504	0.01975	53	4	0.00010858	7.755e-05	0.00188	0.00134	0.20925	0.00596	0.13429	0.00566	0.47816	0.00776	12.3944	0.27778	0.188	0.00255	0.7999	2519.25	33.94	2724.72	22.51	7.5
9358-112.2	IP480-2	109.23	62.63	0.59228	0.01443	56	1	3.496e-05	0.00021688	0.00061	0.00376	0.16813	0.0091	0.12708	0.00777	0.44767	0.00653	9.95079	0.28034	0.16121	0.0036	0.6169	2384.88	29.14	2468.42	38.24	3.4
9358-113.2	IP480-2	111.8	41.15	0.38019	0.01057	58	3	5.704e-05	5.146e-05	0.00099	0.00089	0.1201	0.00612	0.14763	0.01014	0.46735	0.01716	10.4417	0.58699	0.16204	0.00619	0.7381	2471.94	75.82	2477.06	65.99	0.2
9358-116.1	IP480-1	93.67	120.23	1.32598	0.0316	37	2	7.763e-05	0.00011677	0.00135	0.00202	0.36725	0.0099	0.08562	0.00347	0.30915	0.00577	5.09551	0.15626	0.11954	0.00264	0.6988	1736.51	28.48	1949.39	40.04	10.9
9358-117.1	IP480-1	61.05	38.94	0.65887	0.01702	30	3	0.00014515	0.00012799	0.00252	0.00222	0.17042	0.00889	0.11077	0.00677	0.42826	0.00799	10.6344	0.3023	0.18009	0.00346	0.7411	2297.88	36.18	2653.74	32.26	13.4
07RAT-12
9359-001.1	IP480-1	32.96	37.59	1.17806	0.03242	15	1	6.708e-05	0.00013129	0.00116	0.00228	0.35564	0.01646	0.10957	0.00638	0.36295	0.00803	6.38825	0.22302	0.12765	0.00311	0.7209	1996.14	38.08	2065.92	43.63	3.4
9359-002.1	IP480-1	179.92	187.53	1.07676	0.02449	72	10	0.00019032	0.00010714	0.0033	0.00186	0.19512	0.01259	0.06418	0.00453	0.35419	0.00603	5.956	0.14448	0.12196	0.00187	0.7801	1954.57	28.75	1985.1	27.47	1.5
9359-004.1	IP480-1	157.09	139.88	0.91989	0.02353	97	0	9.9e-07	1.528e-05	2e-05	0.00026	0.23333	0.01034	0.12879	0.00692	0.50775	0.00833	12.5371	0.25031	0.17908	0.0017	0.8814	2647.02	35.72	2644.35	15.87	-0.1
9359-005.1	IP480-1	47.79	16.59	0.35869	0.00964	25	2	0.00011354	0.00017062	0.00197	0.00296	0.09515	0.00773	0.12777	0.01141	0.48166	0.01229	11.467	0.43682	0.17267	0.00436	0.7529	2534.48	53.71	2583.66	42.82	1.9
9359-006.1	IP480-1	49.55	54.19	1.12974	0.03213	22	1	3.676e-05	0.00015392	0.00064	0.00267	0.30076	0.01899	0.09514	0.00689	0.35739	0.00761	6.24291	0.20293	0.12669	0.00279	0.7397	1969.78	36.24	2052.55	39.45	4
9359-008.1	IP480-1	199.15	470.09	2.43852	0.06773	65	8	0.00015195	4.967e-05	0.00263	0.00086	0.19195	0.00433	0.02283	0.00091	0.29009	0.00499	4.6096	0.1015	0.11525	0.00136	0.8481	1641.99	24.99	1883.74	21.33	12.8
9359-009.1	IP480-1	226.43	76.74	0.35009	0.00803	87	1	2.003e-05	6.004e-05	0.00035	0.00104	0.09252	0.00417	0.09677	0.00515	0.36618	0.00606	6.24674	0.14531	0.12372	0.00178	0.7884	2011.42	28.64	2010.61	25.81	0
9359-011.1	IP480-1	62.34	25.79	0.42731	0.01284	25	3	0.00014685	7.875e-05	0.00254	0.00136	0.12574	0.01204	0.11117	0.01137	0.37779	0.00745	6.63967	0.18983	0.12747	0.00234	0.7702	2065.96	34.96	2063.31	32.77	-0.1
9359-012.1	IP480-1	151.13	111.5	0.76218	0.01689	62	3	6.496e-05	2.834e-05	0.00113	0.00049	0.22784	0.00435	0.1056	0.00403	0.35324	0.00864	5.90401	0.15665	0.12122	0.00093	0.9577	1950.06	41.27	1974.26	13.78	1.2
9359-014.1	IP480-1	198.11	75.75	0.39501	0.00857	71	2	3.543e-05	6.056e-05	0.00061	0.00105	0.11032	0.00644	0.09439	0.00607	0.33797	0.00543	5.38199	0.1091	0.11549	0.00121	0.8575	1876.91	26.22	1887.61	19.04	0.6
9359-015.1	IP480-1	141.28	75.5	0.55206	0.01218	107	2	3.024e-05	2.715e-05	0.00052	0.00047	0.13866	0.00625	0.15946	0.00843	0.63489	0.01046	21.1194	0.37399	0.24126	0.00115	0.9639	3168.88	41.38	3128.3	7.57	-1.3
9359-016.1	IP480-1	123.14	59.77	0.50144	0.01188	44	2	7e-05	5.602e-05	0.00121	0.00097	0.14074	0.00956	0.09193	0.00679	0.32754	0.00547	5.15553	0.11111	0.11416	0.00133	0.8431	1826.44	26.63	1866.65	21.23	2.2
9359-017.1	IP480-1	104.12	78.19	0.77575	0.02103	42	0	1.69e-06	6.874e-05	3e-05	0.00119	0.22491	0.0398	0.1015	0.01826	0.35007	0.00621	5.74315	0.1414	0.11898	0.00178	0.7972	1934.95	29.74	1941.03	27.04	0.3
9359-019.1	IP480-1	157.38	33.13	0.21747	0.00559	55	3	6.318e-05	4.255e-05	0.0011	0.00074	0.05702	0.00361	0.0907	0.00639	0.3459	0.00581	5.58429	0.11258	0.11709	0.00108	0.8908	1914.97	27.9	1912.27	16.66	-0.1
9359-020.1	IP480-1	40.66	61.39	1.5598	0.04002	24	5	0.00032534	0.00010382	0.00564	0.0018	0.40453	0.01138	0.11397	0.00492	0.43946	0.0089	10.0292	0.27206	0.16552	0.0026	0.8186	2348.22	39.96	2512.83	26.64	6.6
9359-023.1	IP480-1	42.72	35.76	0.86463	0.03276	23	4	0.00026011	0.00010794	0.00451	0.00187	0.20349	0.01423	0.10893	0.00889	0.46284	0.00841	10.7038	0.28642	0.16773	0.00294	0.7607	2452.1	37.16	2535.08	29.67	3.3
9359-024.1	IP480-1	28.95	24.43	0.87168	0.02871	12	1	0.0001223	0.00020882	0.00212	0.00362	0.24676	0.02363	0.0964	0.01	0.34052	0.00763	5.93366	0.34258	0.12638	0.00638	0.4974	1889.15	36.8	2048.23	91.99	7.8
9359-025.1	IP480-1	34.36	36.11	1.08592	0.03682	15	9	0.00080545	0.00052059	0.01396	0.00902	0.24784	0.02209	0.08318	0.0082	0.36447	0.00915	5.91299	0.46574	0.11766	0.00842	0.4325	2003.32	43.39	1921.05	134.24	-4.3
9359-026.1	IP480-1	69.47	69.26	1.02995	0.02424	27	10	0.00052813	0.0001417	0.00915	0.00246	0.26031	0.01831	0.08229	0.00637	0.32561	0.00726	5.4561	0.20079	0.12153	0.00324	0.6961	1817.08	35.39	1978.8	48.2	8.2
9359-027.1	IP480-1	114.77	60.69	0.54631	0.01604	45	7	0.00018414	5.719e-05	0.00319	0.00099	0.13661	0.0057	0.09	0.00483	0.35992	0.00594	6.29044	0.13423	0.12676	0.00147	0.841	1981.81	28.2	2053.47	20.69	3.5
9359-030.1	IP480-1	53.74	22.72	0.43676	0.01782	17	5	0.00036945	0.00018424	0.0064	0.00319	0.1197	0.01142	0.07998	0.00843	0.29186	0.00544	4.20681	0.18782	0.10454	0.004	0.5251	1650.8	27.23	1706.23	72.21	3.2
9359-032.1	IP480-1	88.31	33.39	0.39061	0.00926	37	5	0.0001466	5.441e-05	0.00254	0.00094	0.03907	0.00296	0.04067	0.00334	0.40662	0.00874	8.75199	0.21995	0.15611	0.00166	0.9078	2199.44	40.16	2413.91	18.15	8.9
9359-034.1	IP480-1	165.17	86.31	0.53984	0.01225	58	3	5.715e-05	5.54e-05	0.00099	0.00096	0.14483	0.00814	0.08731	0.00556	0.32541	0.00642	5.18842	0.13419	0.11564	0.00167	0.8326	1816.11	31.3	1889.84	26.22	3.9
9359-035.1	IP480-1	155.09	51.74	0.34466	0.00847	58	6	0.00011786	0.0001214	0.00204	0.0021	0.08892	0.0058	0.09183	0.0066	0.35594	0.00626	6.10904	0.15783	0.12448	0.0021	0.7623	1962.9	29.83	2021.39	30.17	2.9
9359-036.1	IP480-1	223.37	143.6	0.66411	0.01485	177	2	1.685e-05	1.687e-05	0.00029	0.00029	0.17039	0.00426	0.16299	0.00624	0.63527	0.01175	24.4669	0.55776	0.27933	0.00313	0.8729	3170.4	46.49	3359.19	17.62	5.6
9359-037.1	IP480-1	128.94	60.7	0.4863	0.01492	58	3	5.546e-05	9.222e-05	0.00096	0.0016	0.12892	0.00532	0.10926	0.00591	0.41214	0.00692	8.12554	0.18839	0.14299	0.00201	0.7997	2224.68	31.66	2263.75	24.4	1.7
9359-039.1	IP480-1	101.23	52	0.53061	0.01247	35	4	0.00015475	0.00014862	0.00268	0.00258	0.14724	0.01129	0.0884	0.00727	0.31857	0.00588	5.04994	0.16809	0.11497	0.00293	0.65	1782.74	28.8	1879.4	46.66	5.1
9359-040.1	IP480-1	41.27	30.66	0.76763	0.02017	17	4	0.0002791	0.00012731	0.00484	0.00221	0.2084	0.0113	0.09583	0.00643	0.35299	0.01039	6.02777	0.26626	0.12385	0.00365	0.7499	1948.84	49.71	2012.42	53.19	3.2
9359-041.1	IP480-1	64.81	40.36	0.64338	0.01713	34	1	5.556e-05	9.391e-05	0.00096	0.00163	0.15959	0.00632	0.11276	0.00581	0.45459	0.00888	10.9491	0.28449	0.17469	0.0026	0.8234	2415.62	39.48	2603.06	24.98	7.2
9359-043.1	IP480-1	172.28	217.24	1.30267	0.02859	96	2	2.45e-05	2.809e-05	0.00042	0.00049	0.29599	0.00574	0.10063	0.00341	0.44288	0.00751	10.0215	0.20027	0.16411	0.00142	0.9028	2363.52	33.64	2498.5	14.66	5.4
9359-044.1	IP480-1	120.76	66.1	0.56544	0.01423	40	4	0.00012887	7.492e-05	0.00223	0.0013	0.15376	0.00813	0.08217	0.00501	0.3022	0.00508	4.76871	0.12081	0.11445	0.00194	0.7469	1702.21	25.18	1871.19	30.94	9
9359-045.1	IP480-1	73.89	95.96	1.34163	0.0357	29	2	0.0001199	7.218e-05	0.00208	0.00125	0.39846	0.02079	0.08966	0.00565	0.30188	0.00701	5.12881	0.17294	0.12322	0.00268	0.7689	1700.65	34.79	2003.34	39.1	15.1
9359-047.1	IP480-1	96.62	51.25	0.54791	0.01377	53	2	4.343e-05	4.799e-05	0.00075	0.00083	0.14086	0.00554	0.12346	0.00616	0.48025	0.00847	11.6229	0.266	0.17553	0.0022	0.8392	2528.35	36.99	2611.06	21.04	3.2
9359-048.1	IP480-1	95.51	43.83	0.47407	0.01835	49	2	4.772e-05	0.00010104	0.00083	0.00175	0.12583	0.01157	0.12086	0.01227	0.45532	0.00872	11.2765	0.30332	0.17962	0.00299	0.7894	2418.88	38.74	2649.35	27.88	8.7
9359-049.1	IP480-1	197.06	76.73	0.40225	0.0092	64	3	5.974e-05	5.34e-05	0.00104	0.00093	0.11077	0.01086	0.08463	0.00864	0.30734	0.00518	4.82485	0.10459	0.11386	0.00133	0.8449	1727.59	25.59	1861.9	21.26	7.2
9359-053.1	IP480-1	108.96	38.05	0.3608	0.00861	38	3	0.00011193	7.438e-05	0.00194	0.00129	0.09635	0.0046	0.08898	0.00502	0.33319	0.00608	5.34824	0.13156	0.11642	0.00167	0.8144	1853.83	29.45	1901.92	26.08	2.5
9359-055.1	IP480-1	296.57	170.83	0.59506	0.01247	114	3	3.601e-05	2.066e-05	0.00062	0.00036	0.16535	0.00324	0.09621	0.00316	0.34624	0.00552	5.69371	0.10378	0.11926	0.00084	0.9229	1916.63	26.48	1945.24	12.7	1.5
9359-056.1	IP480-1	36.37	32.36	0.91916	0.02521	15	5	0.00046262	0.00018206	0.00802	0.00316	0.18784	0.01227	0.07397	0.00549	0.36196	0.00797	6.23058	0.24063	0.12484	0.00363	0.6645	1991.47	37.85	2026.57	52.44	1.7
9359-057.1	IP480-1	148.54	79.45	0.55253	0.01507	57	4	8.211e-05	0.00010951	0.00142	0.0019	0.15225	0.00798	0.09647	0.00594	0.35008	0.00602	5.98151	0.15167	0.12392	0.00206	0.7605	1934.98	28.83	2013.43	29.73	3.9
9359-058.1	IP480-1	32.29	36.17	1.15714	0.03208	13	5	0.00057969	0.00025913	0.01005	0.00449	0.31483	0.02115	0.08964	0.00684	0.32946	0.00762	5.3586	0.27568	0.11796	0.00509	0.5543	1835.78	37.05	1925.58	79.43	4.7
9359-059.1	IP480-1	157.41	100.88	0.66204	0.01461	63	9	0.00017792	5.218e-05	0.00308	0.0009	0.17423	0.00476	0.09319	0.00378	0.35412	0.00719	6.31538	0.16338	0.12934	0.00177	0.8511	1954.24	34.33	2089.09	24.27	6.5
9359-061.1	IP480-1	69.16	31.39	0.46892	0.01192	46	3	9.013e-05	5.786e-05	0.00156	0.001	0.1187	0.00488	0.1446	0.00753	0.57125	0.01098	17.7477	0.50468	0.22533	0.00421	0.7579	2912.96	45.19	3019.15	30.33	3.5
9359-063.1	IP480-1	60.2	49.31	0.84618	0.0234	21	3	0.0001653	0.00014971	0.00286	0.00259	0.23492	0.01667	0.08295	0.00657	0.29879	0.00654	5.07575	0.22779	0.12321	0.0045	0.5898	1685.31	32.57	2003.16	66.33	15.9
9359-064.1	IP480-1	22.48	24.56	1.12904	0.03663	10	2	0.00033361	0.00022312	0.00578	0.00387	0.32	0.01652	0.0964	0.0064	0.34013	0.00891	5.87384	0.28779	0.12525	0.00479	0.6321	1887.27	42.99	2032.35	69.33	7.1
9359-066.1	IP480-1	202.6	247.36	1.26129	0.02665	152	4	3.606e-05	6.638e-05	0.00063	0.00115	0.25264	0.00439	0.11676	0.00375	0.58292	0.00983	19.2696	0.40871	0.23975	0.00262	0.8594	2960.63	40.15	3118.34	17.51	5.1
9359-068.1	IP480-1	61.82	43.07	0.71967	0.021	33	4	0.00017942	0.00018654	0.00311	0.00323	0.18914	0.01301	0.1204	0.00925	0.45814	0.00819	11.0232	0.30859	0.1745	0.00339	0.7253	2431.34	36.31	2601.32	32.75	6.5
9359-069.1	IP480-1	133.84	76.98	0.59419	0.01674	75	4	7.542e-05	7.113e-05	0.00131	0.00123	0.15708	0.00628	0.12994	0.00671	0.49152	0.00815	11.871	0.23412	0.17516	0.00154	0.8962	2577.25	35.3	2607.61	14.77	1.2
9359-071.1	IP480-1	80.39	84.69	1.08829	0.02504	38	3	0.00010372	0.00016368	0.0018	0.00284	0.28777	0.01642	0.1019	0.00683	0.38535	0.01025	7.41605	0.2895	0.13958	0.00355	0.7631	2101.21	47.89	2221.99	44.74	5.4
9359-072.1	IP480-1	26.72	29.09	1.12454	0.04447	11	1	7.675e-05	0.00019526	0.00133	0.00338	0.30373	0.01801	0.09074	0.00703	0.33596	0.01022	5.92616	0.30005	0.12793	0.00471	0.6917	1867.19	49.5	2069.79	66.42	9.8
9359-074.1	IP480-1	149.36	111.31	0.76983	0.01809	56	4	8.679e-05	7.24e-05	0.0015	0.00125	0.22665	0.01677	0.09564	0.00761	0.32485	0.00574	5.29946	0.12879	0.11832	0.00173	0.8025	1813.37	28	1930.96	26.41	6.1
9359-075.1	IP480-1	48.58	56.27	1.19661	0.03392	22	12	0.00078671	0.00034438	0.01363	0.00597	0.32815	0.02172	0.09677	0.00742	0.35286	0.00934	8.92037	0.45879	0.18335	0.0075	0.6139	1948.24	44.64	2683.4	69.32	27.4
9359-076.1	IP480-1	103.35	52.44	0.5242	0.01609	53	6	0.00014776	0.00011513	0.00256	0.002	0.13227	0.00797	0.11486	0.00816	0.45523	0.00986	10.8342	0.34832	0.17261	0.00366	0.7559	2418.46	43.81	2583.11	35.86	6.4
9359-077.1	IP480-1	64.4	49.58	0.79525	0.02029	24	17	0.00094445	0.00117073	0.01637	0.02029	0.18376	0.04462	0.07543	0.01854	0.32644	0.00907	5.22636	0.86793	0.11612	0.01861	0.2879	1821.08	44.22	1897.3	320.35	4
9359-078.1	IP480-1	29.21	22.84	0.80764	0.02542	12	3	0.00036281	0.00048505	0.00629	0.00841	0.20539	0.02155	0.09258	0.01036	0.36406	0.00831	6.39602	0.51675	0.12742	0.00952	0.3981	2001.41	39.39	2062.65	138.02	3
9359-079.1	IP480-1	110.52	49.81	0.46554	0.01245	42	4	0.0001101	0.00021317	0.00191	0.00369	0.1179	0.009	0.08953	0.00742	0.35353	0.00646	6.09531	0.23573	0.12505	0.00399	0.5758	1951.43	30.86	2029.45	57.53	3.8
9359-080.1	IP480-1	68.91	47.45	0.71127	0.02061	26	5	0.0002411	0.00013987	0.00418	0.00242	0.17527	0.02315	0.08278	0.01134	0.33593	0.00739	5.76006	0.23156	0.12436	0.00386	0.6433	1867.05	35.74	2019.7	56.03	7.6
9359-081.1	IP480-1	82.63	100.93	1.26192	0.036	47	7	0.0002274	0.00015268	0.00394	0.00265	0.33807	0.01677	0.11777	0.00703	0.43961	0.00744	9.17499	0.23915	0.15137	0.0027	0.7351	2348.91	33.42	2361.43	30.73	0.5
9359-083.1	IP480-1	35.72	78.59	2.2732	0.06581	14	13	0.00121342	0.00043811	0.02103	0.00759	0.2087	0.02139	0.03236	0.00356	0.35245	0.0095	6.00597	0.40938	0.12359	0.00733	0.5044	1946.29	45.46	2008.69	109.22	3.1
9359-085.1	IP480-1	148.54	144.61	1.00571	0.02183	83	2	4.266e-05	9.655e-05	0.00074	0.00167	0.26021	0.00579	0.11792	0.00424	0.45575	0.00827	10.7439	0.23997	0.17098	0.00187	0.874	2420.74	36.74	2567.23	18.41	5.7
9359-086.1	IP480-1	44.24	34.28	0.8005	0.02151	18	0	9.8e-06	0.00024286	0.00017	0.00421	0.23319	0.01316	0.10257	0.0068	0.3521	0.00781	6.2073	0.26415	0.12786	0.0043	0.62	1944.63	37.34	2068.74	60.54	6
9359-087.1	IP480-1	236.14	105.08	0.45969	0.01186	78	3	4.312e-05	5.865e-05	0.00075	0.00102	0.12293	0.00824	0.08292	0.00611	0.31008	0.00508	4.88729	0.10112	0.11431	0.00123	0.8571	1741.12	25.06	1869.05	19.51	6.8
9359-088.1	IP480-1	120.67	67.67	0.57928	0.01396	36	8	0.00028442	0.00011191	0.00493	0.00194	0.15591	0.01066	0.07466	0.00568	0.27741	0.00641	3.98289	0.1452	0.10413	0.00265	0.7211	1578.3	32.43	1699.01	47.65	7.1
9359-089.1	IP480-1	19.09	13.66	0.73892	0.04545	7	7	0.00124176	0.00050407	0.02152	0.00874	0.19982	0.03607	0.08934	0.01725	0.33036	0.00996	5.39181	0.57307	0.11837	0.01163	0.3992	1840.14	48.46	1931.76	187.21	4.7
9359-092.1	IP480-1	174.9	92.67	0.54737	0.01277	72	7	0.00012619	7.815e-05	0.00219	0.00135	0.08971	0.0067	0.06376	0.00511	0.38902	0.00673	7.39899	0.17582	0.13794	0.00197	0.8035	2118.28	31.33	2201.54	24.97	3.8
9359-093.1	IP480-1	134.78	59.55	0.45642	0.01313	63	12	0.00024164	6.206e-05	0.00419	0.00108	0.098	0.00526	0.09346	0.00593	0.43526	0.00783	9.4383	0.19869	0.15727	0.0014	0.9073	2329.39	35.26	2426.51	15.21	4
9359-095.1	IP480-1	135.07	78.03	0.5968	0.01325	52	3	6.303e-05	0.00011389	0.00109	0.00197	0.17433	0.00771	0.10156	0.00528	0.34768	0.00547	5.81168	0.14288	0.12123	0.00206	0.7263	1923.53	26.21	1974.43	30.66	2.6
9359-096.1	IP480-1	51.64	37.46	0.74943	0.02162	22	3	0.0001784	0.00010862	0.00309	0.00188	0.21389	0.01194	0.10496	0.00683	0.36776	0.00622	6.29624	0.20008	0.12417	0.00309	0.63	2018.86	29.38	2016.98	44.77	-0.1
9359-097.1	IP480-1	191.79	97.81	0.52683	0.0114	82	3	4.842e-05	3.089e-05	0.00084	0.00054	0.14923	0.00604	0.10955	0.00527	0.38672	0.00555	7.11321	0.1196	0.1334	0.00095	0.907	2107.6	25.86	2143.25	12.53	1.7
9359-098.1	IP480-2	99.53	93.56	0.97106	0.02186	44	25	0.00079085	0.00013605	0.01371	0.00236	0.29011	0.00876	0.10931	0.00445	0.36589	0.00566	6.3523	0.16658	0.12592	0.00243	0.6825	2010.01	26.79	2041.73	34.56	1.6
9359-101.1	IP480-2	287.84	21.32	0.07653	0.00196	104	8	8.583e-05	2.411e-05	0.00149	0.00042	0.01493	0.00154	0.07157	0.00767	0.36689	0.00523	6.43919	0.10523	0.12729	0.00081	0.9219	2014.74	24.73	2060.89	11.3	2.2
9359-104.1	IP480-2	65.93	78.94	1.23696	0.02856	30	0	1e-05	1e-05	0.00017	0.00017	0.35901	0.01889	0.10291	0.0064	0.35457	0.00842	5.85548	0.23458	0.11977	0.00352	0.6847	1956.39	40.2	1952.83	53.53	-0.2
9359-106.1	IP480-2	194.97	25.08	0.1329	0.0035	96	7	9.146e-05	7.13e-05	0.00159	0.00124	0.03623	0.00306	0.12917	0.01161	0.47384	0.00722	11.0931	0.25021	0.16979	0.00252	0.7581	2500.38	31.67	2555.6	25.04	2.2
9359-107.1	IP480-2	110.11	115.18	1.08054	0.0245	70	5	0.00011243	5.931e-05	0.00195	0.00103	0.29677	0.00672	0.13705	0.00509	0.499	0.00937	12.8524	0.27528	0.1868	0.00153	0.9248	2609.49	40.43	2714.23	13.61	3.9
9359-110.1	IP480-2	35.34	44.29	1.29488	0.04581	17	2	0.00017594	0.00042163	0.00305	0.00731	0.38527	0.02289	0.10793	0.00817	0.36276	0.01118	6.11517	0.44989	0.12226	0.00771	0.5259	1995.25	53.09	1989.48	116.66	-0.3
9359-112.1	IP480-2	129.64	107.23	0.85449	0.01871	77	1	1e-05	1e-05	0.00017	0.00017	0.24383	0.00995	0.1379	0.00672	0.48327	0.00736	11.9326	0.21185	0.17908	0.00133	0.9098	2541.48	32.06	2644.36	12.38	3.9
9359-113.1	IP480-2	25.95	16.35	0.65096	0.02052	10	2	0.0002242	0.00024196	0.00389	0.00419	0.19886	0.01461	0.10788	0.00889	0.35314	0.00709	6.30105	0.26301	0.12941	0.00442	0.583	1949.56	33.84	2089.98	61.36	6.7
9359-114.1	IP480-2	122.4	102.55	0.86556	0.02294	102	2	2.53e-05	4.608e-05	0.00044	0.0008	0.23061	0.00514	0.17294	0.00661	0.64913	0.01053	23.697	0.44907	0.26477	0.00211	0.9086	3224.79	41.29	3275.29	12.6	1.5
94LAA-R34
9238-003.1	IP431-1	89.9	79.48	0.91334	0.01923	34	1	5.143e-05	4.443e-05	0.00089	0.00077	0.26636	0.0032	0.09315	0.00263	0.3194	0.0046	4.98681	0.09524	0.11324	0.00123	0.8249	1786.78	22.5	1852.02	19.81	3.5
9238-005.1	IP431-1	66.64	30.86	0.47835	0.01032	37	0	1e-05	1.373e-05	0.00017	0.00024	0.13494	0.00162	0.13772	0.00394	0.48821	0.00708	11.7245	0.21478	0.17417	0.00166	0.8569	2562.94	30.76	2598.17	15.95	1.4
9238-006.1	IP431-1	46.75	31.56	0.69743	0.11426	21	2	9.769e-05	4.173e-05	0.00169	0.00072	0.18584	0.00586	0.10279	0.01721	0.38575	0.00557	7.24492	0.14596	0.13622	0.00168	0.7938	2103.09	25.98	2179.63	21.66	3.5
9238-007.1	IP431-1	295.42	216.32	0.75645	0.0153	110	2	2.203e-05	1.086e-05	0.00038	0.00019	0.21293	0.00132	0.09145	0.00225	0.32488	0.00407	5.03616	0.07083	0.11243	0.00057	0.9348	1813.53	19.82	1839.02	9.14	1.4
9238-008.1	IP431-1	24.68	17.79	0.74473	0.0185	12	0	2.311e-05	8.022e-05	0.0004	0.00139	0.21089	0.00623	0.12211	0.00522	0.43122	0.00789	8.99904	0.22338	0.15135	0.00222	0.8106	2311.23	35.62	2361.27	25.23	2.1
9238-010.1	IP431-1	72.38	37.01	0.52823	0.01335	54	1	2.431e-05	1.714e-05	0.00042	0.0003	0.1408	0.00215	0.16686	0.00549	0.62603	0.00911	21.3885	0.38943	0.24779	0.0023	0.8632	3133.87	36.24	3170.7	14.76	1.2
9238-011.1	IP431-1	22.5	29.38	1.34893	0.07863	9	0	4.941e-05	8.952e-05	0.00086	0.00155	0.37919	0.01124	0.08511	0.00577	0.30277	0.0054	4.28749	0.12736	0.10271	0.00222	0.6913	1705.02	26.77	1673.58	40.53	-1.9
9238-012.1	IP431-1	130.21	48.21	0.38248	0.00809	64	3	5.31e-05	1.57e-05	0.00092	0.00027	0.10796	0.00164	0.12743	0.00378	0.45146	0.00638	9.7855	0.15491	0.1572	0.00088	0.9363	2401.73	28.38	2425.81	9.53	1
9238-014.1	IP431-1	119.92	55.58	0.47878	0.01113	63	2	4.89e-05	1.469e-05	0.00085	0.00025	0.13368	0.00142	0.13044	0.00382	0.46714	0.00669	10.5519	0.16314	0.16383	0.0007	0.9614	2471.01	29.48	2495.54	7.24	1
9238-015.1	IP431-1	104.6	40.42	0.39915	0.00907	57	2	3.39e-05	1.352e-05	0.00059	0.00023	0.10763	0.00173	0.1337	0.00416	0.49585	0.00692	11.8306	0.18559	0.17304	0.00097	0.9349	2595.94	29.91	2587.3	9.4	-0.3
9238-016.1	IP431-1	64.62	62.76	1.00322	0.02125	23	1	7.239e-05	5.235e-05	0.00125	0.00091	0.29708	0.00581	0.08829	0.00308	0.29816	0.00584	4.24075	0.12021	0.10316	0.00188	0.7708	1682.17	29.05	1681.67	33.99	0
9238-017.1	IP431-1	42.34	37.84	0.92327	0.02018	17	1	7.387e-05	9.081e-05	0.00128	0.00157	0.26068	0.00629	0.09368	0.00342	0.33179	0.0055	5.09069	0.12676	0.11128	0.00185	0.7495	1847.04	26.69	1820.42	30.46	-1.5
9238-018.1	IP431-1	20.83	12.34	0.61188	0.01541	8	1	0.00010053	0.00014263	0.00174	0.00247	0.17571	0.00966	0.10398	0.00686	0.3621	0.0095	6.16917	0.25635	0.12357	0.0036	0.719	1992.11	45.12	2008.34	52.59	0.8
9238-021.1	IP431-1	200.18	135.09	0.69716	0.02147	73	2	3.347e-05	2.176e-05	0.00058	0.00038	0.2016	0.0018	0.09345	0.00343	0.32318	0.00581	5.01142	0.10226	0.11247	0.00086	0.9276	1805.22	28.35	1839.64	13.97	1.9
9238-022.1	IP431-1	23.17	16.55	0.73787	0.01871	14	1	0.0001115	6.548e-05	0.00193	0.00113	0.20102	0.00412	0.13529	0.00512	0.49659	0.00955	11.9691	0.33053	0.17481	0.00307	0.7758	2599.13	41.26	2604.22	29.56	0.2
9238-023.1	IP431-1	43.22	20.96	0.501	0.01097	21	1	7.694e-05	7.163e-05	0.00133	0.00124	0.15033	0.00338	0.12868	0.00446	0.42885	0.00629	8.75018	0.1895	0.14798	0.0021	0.7593	2300.51	28.44	2322.76	24.56	1
9238-024.1	IP431-1	160	65.1	0.4203	0.0167	67	2	3.95e-05	2.098e-05	0.00068	0.00036	0.10216	0.00149	0.09565	0.00432	0.39354	0.00619	7.75847	0.17588	0.14299	0.00207	0.7734	2139.2	28.68	2263.67	25.2	5.5
9238-026.1	IP431-2	263.89	342.7	1.34157	0.05331	99	31	0.00042267	6.343e-05	0.00733	0.0011	0.23331	0.00888	0.05607	0.00369	0.32242	0.01167	5.15789	0.28048	0.11602	0.00421	0.7489	1801.54	57.12	1895.84	66.8	5
9238-029.1	IP431-1	22.68	23.09	1.05189	0.02674	8	1	0.00018864	0.00023398	0.00327	0.00406	0.27675	0.01204	0.07657	0.00421	0.29101	0.00636	4.1667	0.20284	0.10384	0.00424	0.554	1646.59	31.85	1693.92	77.27	2.8
9238-030.1	IP431-1	77.71	50.74	0.67463	0.01466	40	1	5.002e-05	4.874e-05	0.00087	0.00084	0.18876	0.01429	0.12447	0.01042	0.44484	0.01259	9.64981	0.29498	0.15733	0.00135	0.9607	2372.28	56.41	2427.17	14.57	2.3
9238-031.1	IP431-2	19.95	26.19	1.35635	0.0424	7	4	0.00078639	0.00038198	0.01363	0.00662	0.36044	0.01759	0.07669	0.00488	0.28861	0.00761	3.74149	0.28649	0.09402	0.00646	0.4563	1634.56	38.17	1508.59	135.59	-8.4
9238-032.1	IP431-2	116.12	54.35	0.48349	0.01057	63	5	9.652e-05	3.211e-05	0.00167	0.00056	0.1288	0.00207	0.12969	0.00409	0.48682	0.00782	11.5162	0.20818	0.17157	0.00112	0.9334	2556.9	33.98	2573.02	10.97	0.6
9238-032.1	IP431-1	156.74	83.82	0.55246	0.01284	86	6	8.899e-05	3.773e-05	0.00154	0.00065	0.15404	0.00355	0.13316	0.00491	0.47757	0.00813	11.6018	0.2354	0.17619	0.0016	0.8953	2516.68	35.58	2617.34	15.24	3.8
9238-033.1	IP431-1	91.68	37.68	0.42461	0.01257	45	4	0.00010708	6.066e-05	0.00186	0.00105	0.11712	0.00315	0.12245	0.00565	0.44395	0.01019	9.90229	0.28462	0.16177	0.00237	0.8623	2368.32	45.65	2474.24	24.98	4.3
9238-035.1	IP431-1	109.2	76.21	0.72095	0.01522	54	1	1.655e-05	1.991e-05	0.00029	0.00035	0.20779	0.00235	0.12234	0.00347	0.42449	0.00643	8.85641	0.17541	0.15132	0.00167	0.8338	2280.84	29.15	2360.86	18.94	3.4
9238-037.1	IP431-1	27.54	28.79	1.08011	0.03144	21	1	9.408e-05	5.049e-05	0.00163	0.00088	0.30303	0.00594	0.16145	0.0068	0.57546	0.01341	16.758	0.46401	0.21121	0.0026	0.8972	2930.2	55.1	2914.81	20.1	-0.5
9238-038.1	IP431-1	101.87	100.69	1.0211	0.02206	40	3	9.18e-05	4.115e-05	0.00159	0.00071	0.29695	0.0049	0.09392	0.00311	0.32294	0.00611	5.00237	0.13338	0.11234	0.00186	0.7872	1804.07	29.84	1837.69	30.32	1.8
9238-039.1	IP431-1	37.32	36.16	1.00071	0.03042	13	1	0.00013929	8.457e-05	0.00241	0.00147	0.28281	0.0065	0.08403	0.00361	0.29734	0.00588	4.19721	0.15955	0.10238	0.00308	0.6188	1678.12	29.26	1667.65	56.73	-0.6
9238-040.1	IP431-1	151.98	104.37	0.70947	0.01477	55	1	2.514e-05	2.722e-05	0.00044	0.00047	0.20803	0.00263	0.09382	0.00266	0.31996	0.00464	5.04077	0.09709	0.11426	0.00126	0.8237	1789.56	22.68	1868.24	19.99	4.2
9238-041.1	IP431-1	137.99	63.04	0.47195	0.01078	75	1	1.043e-05	6.34e-06	0.00018	0.00011	0.13106	0.00183	0.13542	0.00419	0.48767	0.00752	11.4738	0.22538	0.17064	0.00177	0.8515	2560.6	32.68	2563.92	17.47	0.1
9238-042.1	IP431-1	271.34	105.16	0.40035	0.00845	133	3	2.616e-05	1.008e-05	0.00045	0.00017	0.10992	0.00138	0.12334	0.00367	0.44923	0.00756	9.98088	0.18456	0.16114	0.00094	0.9495	2391.84	33.71	2467.63	9.91	3.1
9238-043.1	IP431-2	18.81	23.55	1.29316	0.03203	7	5	0.0010581	0.00032937	0.01834	0.00571	0.33287	0.02035	0.07597	0.00529	0.29513	0.00655	3.76798	0.25823	0.0926	0.00575	0.437	1667.13	32.67	1479.63	122.62	-12.7
9238-044.1	IP431-1	61.96	31.3	0.52182	0.01442	30	3	0.00012995	4.951e-05	0.00225	0.00086	0.14744	0.00627	0.12127	0.00659	0.42922	0.00841	9.21234	0.242	0.15566	0.00237	0.8181	2302.19	38.03	2409.11	26.1	4.4
9238-045.1	IP431-2	135.44	114.46	0.873	0.01834	54	1	3.68e-05	4.583e-05	0.00064	0.00079	0.25174	0.00321	0.09723	0.00282	0.3372	0.00522	5.51477	0.10498	0.11861	0.0011	0.8749	1873.18	25.23	1935.46	16.73	3.2
9238-046.1	IP431-1	209.63	154.94	0.76354	0.03081	80	4	6.268e-05	4.247e-05	0.00109	0.00074	0.22139	0.00354	0.09572	0.00515	0.33013	0.01051	5.30634	0.17848	0.11657	0.00089	0.9746	1839.03	51.13	1904.35	13.71	3.4
9238-047.1	IP431-1	83.28	74	0.91797	0.02002	44	2	7.009e-05	3.049e-05	0.00121	0.00053	0.25669	0.00354	0.12172	0.00546	0.43529	0.01597	8.89906	0.35553	0.14827	0.00176	0.9553	2329.53	72.11	2326.1	20.53	-0.1
9238-048.1	IP431-1	41.82	41.78	1.03199	0.02766	15	4	0.00034028	0.00010112	0.0059	0.00175	0.30548	0.00808	0.08514	0.00381	0.28763	0.00693	4.18285	0.15945	0.10547	0.00281	0.7196	1629.65	34.79	1722.59	49.83	5.4
9238-049.1	IP431-1	265.76	159.98	0.62188	0.0133	97	3	4.022e-05	1.735e-05	0.0007	0.0003	0.17323	0.0029	0.09145	0.00278	0.3283	0.00446	5.24523	0.08147	0.11588	0.0007	0.9228	1830.12	21.67	1893.56	10.89	3.4
9238-052.1	IP431-2	105.94	29.16	0.28431	0.00644	49	4	9.134e-05	3.786e-05	0.00158	0.00066	0.0783	0.00339	0.12065	0.0062	0.4381	0.00694	9.29433	0.42514	0.15387	0.0063	0.4583	2342.12	31.19	2389.35	71.49	2
9238-053.1	IP431-2	16.2	24.42	1.55764	0.03952	6	2	0.000576	0.00024974	0.00998	0.00433	0.44733	0.01529	0.08375	0.00415	0.29162	0.00742	4.03485	0.26953	0.10035	0.00589	0.4909	1649.63	37.16	1630.53	113.18	-1.2
9238-055.1	IP431-1	95.93	55.22	0.59466	0.01249	43	2	5.728e-05	4.531e-05	0.00099	0.00079	0.16789	0.00367	0.11164	0.00485	0.39543	0.01232	7.55338	0.25322	0.13854	0.00126	0.963	2147.96	57.15	2209.02	15.88	2.8
9238-055.1	IP431-2	92.82	52.14	0.58027	0.01277	45	0	1e-05	1e-05	0.00017	0.00017	0.15872	0.00355	0.11822	0.0042	0.43221	0.00719	9.04519	0.18108	0.15178	0.00141	0.8885	2315.69	32.43	2366.09	15.89	2.1
9238-056.1	IP431-1	93.41	65.58	0.72523	0.01592	48	3	6.852e-05	3.52e-05	0.00119	0.00061	0.16106	0.00269	0.10115	0.00319	0.45545	0.00695	10.2145	0.18419	0.16266	0.00128	0.901	2419.42	30.86	2483.5	13.36	2.6
9238-057.1	IP431-1	81.48	229.46	2.90925	0.06114	44	1	5.264e-05	4.425e-05	0.00091	0.00077	0.83923	0.01244	0.09261	0.00297	0.32103	0.00613	4.88512	0.12867	0.11036	0.00176	0.8005	1794.76	29.99	1805.41	29.21	0.6
9238-059.1	IP431-2	1756.91	242.99	0.14288	0.00293	395	67	0.00019507	1.946e-05	0.00338	0.00034	0.05193	0.00085	0.08251	0.00251	0.22698	0.00349	3.14322	0.05164	0.10043	0.00042	0.967	1318.67	18.34	1632.13	7.86	19.2
9238-061.1	IP431-2	167.63	77.78	0.47932	0.01051	81	3	4.024e-05	3.136e-05	0.0007	0.00054	0.13508	0.00197	0.12341	0.00381	0.4379	0.00705	9.32622	0.16806	0.15446	0.00098	0.9376	2341.25	31.7	2395.94	10.78	2.3
9238-062.1	IP431-2	53.1	79.57	1.5482	0.06186	21	2	0.00013226	0.00015882	0.00229	0.00275	0.44026	0.00954	0.08286	0.0045	0.2914	0.00866	4.15104	0.18384	0.10332	0.00303	0.7541	1648.53	43.4	1684.52	55.11	2.1
9238-062.1.2	IP431-2	50.69	69.53	1.41687	0.03184	19	3	0.00024413	0.00011827	0.00423	0.00205	0.42222	0.01333	0.08696	0.0037	0.29182	0.00512	4.16811	0.11743	0.10359	0.00207	0.7118	1650.61	25.62	1689.44	37.25	2.3
9238-062.1.3	IP431-2	44.94	60.37	1.3878	0.03016	17	3	0.00028679	0.00013095	0.00497	0.00227	0.39441	0.00913	0.08176	0.00311	0.2877	0.00603	4.07404	0.13512	0.1027	0.00238	0.7193	1630.04	30.25	1673.52	43.55	2.6
9238-062.3.1	IP431-2	50.88	73.69	1.49607	0.03366	19	5	0.00035873	0.00013632	0.00622	0.00236	0.42671	0.00814	0.08271	0.00361	0.28997	0.0093	4.09218	0.17255	0.10235	0.00242	0.8311	1641.39	46.67	1667.21	44.38	1.5
9238-062.3.2	IP431-2	41.34	54.24	1.35529	0.03108	15	3	0.00030188	0.00013798	0.00523	0.00239	0.37962	0.00803	0.07984	0.0029	0.28505	0.00532	3.93589	0.13198	0.10014	0.00257	0.6521	1616.77	26.75	1626.71	48.42	0.6
9238-063.1	IP431-1	206.23	166.12	0.83214	0.01795	78	3	4.831e-05	1.328e-05	0.00084	0.00023	0.23962	0.00212	0.09389	0.00256	0.32605	0.00459	5.00819	0.08311	0.1114	0.0008	0.9021	1819.21	22.34	1822.42	13.15	0.2
9238-064.1	IP431-1	99.36	61.61	0.64058	0.01342	47	1	2.668e-05	2.271e-05	0.00046	0.00039	0.18017	0.00213	0.11559	0.00327	0.41095	0.00615	8.22502	0.15198	0.14516	0.00133	0.8716	2219.27	28.16	2289.67	15.79	3.1
9238-065.1	IP431-1	134.82	54.08	0.41435	0.00863	50	2	4.381e-05	1.7e-05	0.00076	0.00029	0.11689	0.00133	0.09921	0.00272	0.35168	0.00482	5.79252	0.08902	0.11946	0.00065	0.936	1942.63	23.02	1948.13	9.78	0.3
9238-066.1	IP431-1	183.31	146.11	0.82345	0.01804	92	1	1.937e-05	1.19e-05	0.00034	0.00021	0.20631	0.00154	0.10757	0.00287	0.42936	0.0057	8.90609	0.13485	0.15044	0.00088	0.9242	2302.82	25.74	2350.95	9.99	2
9238-068.1	IP431-2	149.35	61.64	0.42633	0.00921	75	4	5.998e-05	4.261e-05	0.00104	0.00074	0.10983	0.00213	0.11856	0.00389	0.46023	0.00702	10.241	0.17758	0.16139	0.00106	0.927	2440.56	31.07	2470.25	11.11	1.2
9238-069.1	IP431-2	37.6	47.8	1.31332	0.03349	14	5	0.00054037	0.0001987	0.00937	0.00344	0.36928	0.0122	0.08221	0.00379	0.29237	0.00569	4.05086	0.16697	0.10049	0.00342	0.5749	1653.34	28.42	1633.16	64.52	-1.2
9238-070.1	IP431-2	131.84	65.7	0.51484	0.01103	63	5	0.00010227	4.28e-05	0.00177	0.00074	0.14435	0.00412	0.12005	0.0047	0.42819	0.00689	8.95211	0.16764	0.15163	0.00118	0.9117	2297.53	31.2	2364.42	13.3	2.8
9238-073.1	IP431-2	175.57	130.54	0.76812	0.01739	86	8	0.00012422	2.92e-05	0.00215	0.00051	0.2071	0.00404	0.11317	0.00383	0.41974	0.00668	8.8583	0.15937	0.15306	0.00102	0.9305	2259.3	30.4	2380.43	11.36	5.1
9238-075.1	IP431-2	109.75	71.56	0.67357	0.01592	63	4	8.37e-05	4.728e-05	0.00145	0.00082	0.17389	0.00288	0.12699	0.00421	0.49191	0.00803	11.651	0.22577	0.17178	0.00148	0.8979	2578.95	34.79	2575.07	14.44	-0.2
9238-076.1	IP431-2	99.2	79.41	0.82693	0.02049	37	5	0.00016514	6.163e-05	0.00286	0.00107	0.23456	0.00414	0.09081	0.00319	0.32016	0.00563	4.93255	0.10953	0.11174	0.00129	0.8568	1790.52	27.55	1827.88	21.07	2
9238-078.1	IP431-2	165.97	77.95	0.48523	0.0108	84	3	4.972e-05	2.119e-05	0.00086	0.00037	0.1309	0.00181	0.12266	0.00377	0.4547	0.00728	10.1344	0.32159	0.16165	0.00412	0.605	2416.12	32.35	2472.97	43.64	2.3
9238-079.1	IP431-2	392.37	1005.32	2.64686	0.05775	219	16	0.00013441	2.431e-05	0.00233	0.00042	0.75363	0.00324	0.09838	0.00261	0.34552	0.00498	5.63682	0.08963	0.11832	0.00061	0.9476	1913.17	23.93	1931.02	9.2	0.9
9238-080.1	IP431-2	94.87	48.95	0.53306	0.01317	53	2	5.028e-05	5.06e-05	0.00087	0.00088	0.14902	0.00292	0.13677	0.00479	0.48926	0.00747	11.7394	0.20618	0.17402	0.00122	0.9187	2567.48	32.4	2596.7	11.71	1.1
9238-081.1	IP431-2	94.21	63.84	0.70001	0.01512	34	5	0.0001763	5.948e-05	0.00306	0.00103	0.1961	0.00553	0.08975	0.00361	0.3204	0.00603	4.87588	0.13521	0.11037	0.002	0.7608	1791.68	29.52	1805.55	33.35	0.8
9238-082.1	IP431-2	227.61	209.36	0.95023	0.02066	87	3	4.131e-05	2.011e-05	0.00072	0.00035	0.27694	0.00589	0.09362	0.00379	0.32124	0.00861	4.94252	0.15281	0.11159	0.00139	0.917	1795.76	42.14	1825.46	22.72	1.6
9238-083.1	IP431-2	98.72	91.49	0.95742	0.02043	37	2	7.435e-05	6.362e-05	0.00129	0.0011	0.2767	0.00409	0.09187	0.00279	0.31787	0.005	4.85302	0.10894	0.11073	0.00157	0.7798	1779.31	24.51	1811.42	25.96	1.8
9238-084.1	IP431-2	199.42	95.27	0.49352	0.01042	104	2	2.895e-05	2.397e-05	0.0005	0.00042	0.13314	0.00167	0.12608	0.00359	0.46733	0.00674	10.4747	0.16396	0.16256	0.00074	0.9577	2471.83	29.68	2482.49	7.67	0.4
9238-085.1	IP431-2	106.07	69.65	0.67829	0.01468	60	2	5.633e-05	3.429e-05	0.00098	0.00059	0.19512	0.00387	0.13847	0.00481	0.48136	0.00895	11.7123	0.28121	0.17647	0.0023	0.8423	2533.21	39.07	2619.96	21.87	3.3
9238-086.1	IP431-2	85.29	36.27	0.43929	0.00978	43	0	7.16e-06	3.325e-05	0.00012	0.00058	0.12899	0.00241	0.13157	0.00441	0.44808	0.00746	10.0863	0.19629	0.16326	0.00134	0.9086	2386.7	33.32	2489.7	13.87	4.1
9238-087.1	IP431-2	52.44	53.56	1.05515	0.02655	21	2	0.00015232	0.00018374	0.00264	0.00318	0.30121	0.01055	0.09295	0.00429	0.32562	0.0054	4.97097	0.16944	0.11072	0.00308	0.5881	1817.13	26.3	1811.26	51.36	-0.3
9238-091.1	IP431-2	63.87	19.82	0.32061	0.00788	26	3	0.00012349	0.00024833	0.00214	0.0043	0.09142	0.00951	0.11056	0.01196	0.38776	0.00644	7.42044	0.26323	0.13879	0.00407	0.5719	2112.44	30.01	2212.18	51.78	4.5
9238-093.1	IP431-2	99.54	102.51	1.06386	0.02459	41	0	1e-05	1e-05	0.00017	0.00017	0.30372	0.00838	0.09682	0.00384	0.33914	0.0056	5.19161	0.12296	0.11102	0.00167	0.777	1882.55	27.03	1816.25	27.54	-3.7
9238-094.1	IP431-2	163.61	96.84	0.61143	0.01326	85	6	8.842e-05	3.699e-05	0.00153	0.00064	0.15931	0.00381	0.11931	0.00428	0.45793	0.00715	10.2195	0.18482	0.16186	0.0012	0.9143	2430.42	31.69	2475.15	12.52	1.8
9238-095.1	IP431-2	20.08	21.5	1.10641	0.04406	8	2	0.00042615	0.00026255	0.00739	0.00455	0.33583	0.01402	0.09139	0.00611	0.3011	0.0102	4.35721	0.26108	0.10496	0.00476	0.66	1696.74	50.74	1713.53	85.85	1
9238-098.1	IP431-2	115.84	51.42	0.45857	0.01083	59	2	5.257e-05	2.782e-05	0.00091	0.00048	0.1235	0.00211	0.12422	0.00414	0.46123	0.00748	10.0669	0.18884	0.1583	0.00121	0.9151	2444.98	33.08	2437.57	12.97	-0.3
9238-100.1	IP431-2	100.97	67.59	0.6915	0.01552	50	1	2.043e-05	7.266e-05	0.00035	0.00126	0.19385	0.00411	0.12086	0.00423	0.43111	0.00711	8.86195	0.18531	0.14909	0.00163	0.8541	2310.73	32.1	2335.47	18.89	1.1
9238-101.1	IP431-2	86.87	68.31	0.81229	0.01795	44	3	8.371e-05	6.531e-05	0.00145	0.00113	0.22257	0.00401	0.11771	0.00382	0.42958	0.00668	8.93979	0.17125	0.15093	0.00142	0.8736	2303.85	30.21	2356.49	16.14	2.2
9238-102.1	IP431-2	140.13	68.38	0.50409	0.01193	49	2	4.508e-05	3.694e-05	0.00078	0.00064	0.14268	0.0024	0.09108	0.00298	0.32178	0.00489	4.94597	0.09174	0.11148	0.00099	0.8791	1798.43	23.88	1823.65	16.25	1.4
9238-104.1	IP431-2	315.75	416.12	1.36147	0.23039	129	13	0.00012953	2.642e-05	0.00224	0.00046	0.13968	0.00178	0.03772	0.00643	0.36766	0.00607	7.68307	0.1466	0.15156	0.00117	0.9158	2018.38	28.67	2363.61	13.24	14.6
9238-108.1	IP431-2	1115.25	294.6	0.27289	0.00556	524	15	3.463e-05	6.11e-06	0.0006	0.00011	0.06807	0.00069	0.11446	0.00319	0.45885	0.00739	7.79354	0.13328	0.12319	0.0005	0.9718	2434.47	32.75	2002.89	7.23	-21.5
9238-110.1	IP431-2	117.73	103.63	0.90937	0.02085	64	1	2.567e-05	0.00010653	0.00044	0.00185	0.25448	0.00498	0.12377	0.00433	0.44227	0.00786	10.0296	0.22681	0.16448	0.00196	0.852	2360.77	35.23	2502.19	20.23	5.7
9238-111.1	IP431-2	157.44	81.59	0.53534	0.01145	75	2	3.394e-05	6.285e-05	0.00059	0.00109	0.15136	0.003	0.12057	0.00407	0.42645	0.00726	8.91412	0.17801	0.1516	0.00129	0.9062	2289.7	32.91	2364.08	14.6	3.1
9238-114.1	IP431-2	146.22	190.05	1.34272	0.02824	64	10	0.00023045	7.71e-05	0.00399	0.00134	0.38277	0.00732	0.09639	0.00325	0.33813	0.00616	5.39491	0.12681	0.11572	0.00148	0.8426	1877.67	29.73	1891.08	23.14	0.7
9238-115.1	IP431-2	85.37	71.97	0.87096	0.01952	46	9	0.00026048	6.035e-05	0.00451	0.00105	0.23583	0.00395	0.12158	0.00395	0.449	0.00743	8.94153	0.25947	0.14443	0.00316	0.6647	2390.81	33.16	2281.02	38.12	-4.8
9238-116.1	IP431-2	59.69	38.96	0.67428	0.01548	31	9	0.0003755	0.00014087	0.00651	0.00244	0.15724	0.00902	0.10648	0.00702	0.45661	0.01042	10.0197	0.3125	0.15915	0.00296	0.8061	2424.55	46.27	2446.66	31.83	0.9
9238-117.1	IP431-2	137.23	106.42	0.80114	0.01726	51	4	9.792e-05	3.659e-05	0.0017	0.00063	0.23398	0.00514	0.09417	0.00332	0.32242	0.00557	4.96884	0.10642	0.11177	0.00119	0.8689	1801.55	27.21	1828.41	19.5	1.5
9238-118.1	IP431-2	224.04	200.91	0.92639	0.02057	82	5	8.082e-05	5.365e-05	0.0014	0.00093	0.26449	0.00442	0.08812	0.00314	0.30863	0.00686	4.78499	0.14923	0.11244	0.00217	0.79	1733.98	33.88	1839.29	35.31	5.7
9238-119.1	IP431-2	133.1	101.92	0.79102	0.02843	49	2	4.35e-05	3.306e-05	0.00075	0.00057	0.2297	0.00387	0.09211	0.00407	0.31719	0.00616	4.95246	0.11743	0.11324	0.00129	0.8789	1775.98	30.21	1852.06	20.76	4.1
9238-124.1	IP431-2	54.82	42.61	0.80302	0.01866	27	1	4.45e-05	9.504e-05	0.00077	0.00165	0.23541	0.00644	0.12252	0.00505	0.41793	0.00846	8.85624	0.23641	0.15369	0.00231	0.8289	2251.09	38.58	2387.37	25.86	5.7
9238-125.1	IP431-2	50	55.76	1.15213	0.02646	19	5	0.00038818	0.00021387	0.00673	0.00371	0.33013	0.01036	0.08931	0.00398	0.31169	0.00681	4.64682	0.19868	0.10813	0.00369	0.611	1749.02	33.57	1768.08	63.65	1.1
Spot name follows the convention x-y.z; where x = sample number, y = grain number and = spot number. Multiple analyses in an individual spot are labelled as x-y.z.z
Uncertainties reported at 1s (absolute) and are calculated by numerical propagation of all known sources of error using Prawn and Lead data reduction software.
f206204 refers to mole fraction of total 206Pb that is due to common Pb, calculated using the 204Pb-method; common Pb composition used is the surface blank (4/6: 0.05770; 7/6: 0.89500; 8/6: 2.13840)
* refers to radiogenic Pb (corrected for common Pb)
Pb/U ratios calibrated using 206Pb/270UO2 vs 254UO/238U method relative to the 6266 reference zircon with a 206Pb/238U age of 559 Ma and a U concentration of 910 (ppm)
Discordance relative to origin = 100 * (1-(206Pb/238U age)/(207Pb/206Pb age))
Sessional Calibration details
Session IP431-1 spot size is ~25µm (K120 aperture), sessional uncertainty in Pb/U calibration is 1.5%, calibration.
Session IP431-2 spot size is ~25µm (K120 aperture), sessional uncertainty in Pb/U calibration is 1.3%, calibration.
Session IP452-1 spot size is ~25µm (K120 aperture), sessional uncertainty in Pb/U calibration is 1.0%, calibration.
Session IP449-1 spot size is ~25µm (K120 aperture), sessional uncertainty in Pb/U calibration is 1.2%, calibration.
Session IP480-2 spot size is ~25µm (K120 aperture), sessional uncertainty in Pb/U calibration is 1.5%, calibration.
Session IP480-2 spot size is ~25µm (K120 aperture), sessional uncertainty in Pb/U calibration is 1.3%, calibration.
